# Supplementary material for: The Escherichia coli Phosphotyrosine Proteome Relates to Core Pathways and Virulence
Source: PLoS Pathog. 2013 Jun 13;9(6):e1003403. doi: 10.1371/journal.ppat.1003403 (PMC3681748; doi:10.1371/journal.ppat.1003403)
Supplement: Table S4 — Phosphotyrosine site motifs defined from sites identified in human proteins. Phosphotyrosine site motifs from 7551 tyrosine phosphorylation sites in human proteins that showed significant overrepresentation were defined using Motif-X [83]. Peptide sequences containing one of the 13 defined phosphotyrosine site motifs and the identity of the corresponding proteins are shown. The occurrence of each motif and the number of proteins containing the motifs are indicated. (XLS) [file ppat.1003403.s010.xls]

## Sheet: Sheet 1
Peptides from human proteins containing one of the 13 pTyr site motifs
RefSeq Accession	GI No.	Site	Residue	Peptide	pTyr site motif
NP_055792.1	7662238	668	Y	RDSSTSyTETKDP	RxxSxxpYxxxxxx
NP_005474.2	50513245	780	Y	RSPSTTyLHTPTP	RxxSxxpYxxxxxx
NP_037425.1	9558733	87	Y	RSRSRSyTPEYRR	RxxSxxpYxxxxxx
NP_004584.1	4759098	86	Y	RSRSRSySRDYRR	RxxSxxpYxxxxxx
NP_008987.2	133922600	432	Y	RSRSRRySRSRSR	RxxSxxpYxxxxxx
NP_001468.1	4503889	10	Y	RGRSTYyWPRPRR	RxxSxxpYxxxxxx
NP_982284.1	44955929	408	Y	RSSSMSyVDGFIG	RxxSxxpYxxxxxx
NP_004584.1	4759098	269	Y	RSPSPYySRGGYR	RxxSxxpYxxxxxx
NP_003760.1	4506903	192	Y	RSTSYGySRSRSG	RxxSxxpYxxxxxx
NP_002963.2	239735519	1777	Y	RSTSTLySQFQTA	RxxSxxpYxxxxxx
NP_057042.2	117190262	30	Y	RRCSRVyLEAYTS	RxxSxxpYxxxxxx
NP_001070862.1	117190326	30	Y	RRCSRVyLEAYTS	RxxSxxpYxxxxxx
NP_001070863.1	117190324	30	Y	RRCSRVyLEAYTS	RxxSxxpYxxxxxx
NP_001271.1	4502847	151	Y	RSQSGGySDRSSG	RxxSxxpYxxxxxx
NP_037425.1	9558733	265	Y	RSPSPYySRYRSR	RxxSxxpYxxxxxx
NP_055995.4	118918403	4111	Y	RRGSMSyLAAVEE	RxxSxxpYxxxxxx
NP_878918.2	118918407	4111	Y	RRGSMSyLAAVEE	RxxSxxpYxxxxxx
NP_006377.2	38201710	602	Y	RRDSASyRDRSET	RxxSxxpYxxxxxx
NP_112020.1	13787204	56	Y	RRDSASyRDRSET	RxxSxxpYxxxxxx
NP_001091974.1	148613856	604	Y	RRDSASyRDRSET	RxxSxxpYxxxxxx
NP_001091975.1	148613858	54	Y	RRDSASyRDRSET	RxxSxxpYxxxxxx
NP_976050.1	42558264	234	Y	RVSSGVyEPVVIE	RxxSxxpYxxxxxx
NP_001030331.1	78191787	376	Y	RVSSGVyEPVVIE	RxxSxxpYxxxxxx
NP_002826.3	196114951	42	Y	RRLSTKyRTEKIY	RxxSxxpYxxxxxx
NP_004604.2	39777597	219	Y	RRSSPVyVGRVVS	RxxSxxpYxxxxxx
NP_945189.1	39777599	219	Y	RRSSPVyVGRVVS	RxxSxxpYxxxxxx
NP_055885.3	116008442	359	Y	RTPSPSyQRTLTP	RxxSxxpYxxxxxx
NP_149079.2	56790935	62	Y	RKDSEGySESPDL	RxxSxxpYxxxxxx
NP_055820.1	61742808	1174	Y	RSGSARyTSTTQT	RxxSxxpYxxxxxx
NP_056176.2	31543535	145	Y	RDSSQEyTDSTGI	RxxSxxpYxxxxxx
NP_002604.1	4505695	9	Y	RTTSQLyDAVPIQ	RxxSxxpYxxxxxx
NP_112558.2	47680169	9	Y	RTTSQLyDAVPIQ	RxxSxxpYxxxxxx
NP_003932.3	51702526	255	Y	RETSKVyYDFIEK	RxxSxxpYxxxxxx
NP_115571.1	21040314	2297	Y	RFASRLySSRFWW	RxxSxxpYxxxxxx
NP_055474.3	66932992	730	Y	RQKSGRyDISKIP	RxxSxxpYxxxxxx
NP_001019634.1	66932994	730	Y	RQKSGRyDISKIP	RxxSxxpYxxxxxx
NP_003310.3	110349715	19758	Y	RNDSGKyTLTIQN	RxxSxxpYxxxxxx
NP_596869.3	110349719	26255	Y	RNDSGKyTLTIQN	RxxSxxpYxxxxxx
NP_597676.2	110349713	19883	Y	RNDSGKyTLTIQN	RxxSxxpYxxxxxx
NP_597681.2	110349717	19950	Y	RNDSGKyTLTIQN	RxxSxxpYxxxxxx
NP_000825.2	167003331	932	Y	RRESSVyDISEHR	RxxSxxpYxxxxxx
NP_006566.2	14589909	31	Y	RVGSGTyGDVYKA	RxxSxxpYxxxxxx
NP_942089.1	38570135	31	Y	RVGSGTyGDVYKA	RxxSxxpYxxxxxx
NP_000251.3	189083798	1885	Y	RNGSRKyPPHLVE	RxxSxxpYxxxxxx
NP_005616.2	56243522	91	Y	RPSSINyMVAPVT	RxxSxxpYxxxxxx
NP_001007068.1	55749490	91	Y	RPSSINyMVAPVT	RxxSxxpYxxxxxx
NP_001007069.1	55749504	85	Y	RPSSINyMVAPVT	RxxSxxpYxxxxxx
NP_001007070.1	55749515	90	Y	RPSSINyMVAPVT	RxxSxxpYxxxxxx
NP_001007071.1	55749523	90	Y	RPSSINyMVAPVT	RxxSxxpYxxxxxx
NP_055717.2	34335253	369	Y	RMRSGSyIKAMGD	RxxSxxpYxxxxxx
NP_000499.1	4503689	277	Y	RGGSTSyGTGSET	RxxSxxpYxxxxxx
NP_068657.1	11761629	277	Y	RGGSTSyGTGSET	RxxSxxpYxxxxxx
NP_056155.1	7661872	611	Y	RLPSGQyLQREEV	RxxSxxpYxxxxxx
NP_775813.2	229093316	374	Y	RFNSGTyNNQWMI	RxxSxxpYxxxxxx
NP_001363.2	114155133	567	Y	RDTSDKyLVLIQM	RxxSxxpYxxxxxx
NP_996744.2	150418009	164	Y	RDSSTPyQEIAAV	RxxSxxpYxxxxxx
NP_001438.1	13787217	2911	Y	RFASEEyRGSVVE	RxxSxxpYxxxxxx
NP_002574.2	55769533	226	Y	RTVSGRyKSTTSV	RxxSxxpYxxxxxx
NP_001348.2	100913206	1241	Y	RGPSGGyRGSGGF	RxxSxxpYxxxxxx
NP_085077.1	13514822	206	Y	RGPSGGyRGSGGF	RxxSxxpYxxxxxx
NP_001035889.1	109633019	175	Y	RKRSIKyDSLLEQ	RxxSxxpYxxxxxx
NP_579877.1	19913348	175	Y	RKRSIKyDSLLEQ	RxxSxxpYxxxxxx
NP_055734.1	19913346	175	Y	RKRSIKyDSLLEQ	RxxSxxpYxxxxxx
NP_579889.1	19913356	175	Y	RKRSIKyDSLLEQ	RxxSxxpYxxxxxx
NP_015627.1	6594683	175	Y	RKRSIKyDSLLEQ	RxxSxxpYxxxxxx
NP_579878.1	19913350	175	Y	RKRSIKyDSLLEQ	RxxSxxpYxxxxxx
NP_579879.1	19913352	175	Y	RKRSIKyDSLLEQ	RxxSxxpYxxxxxx
NP_579888.1	19913354	175	Y	RKRSIKyDSLLEQ	RxxSxxpYxxxxxx
NP_579890.1	19913358	175	Y	RKRSIKyDSLLEQ	RxxSxxpYxxxxxx
NP_003983.2	153791372	70	Y	RRDSDTyRCEERS	RxxSxxpYxxxxxx
NP_001283.1	4557479	70	Y	RRDSDTyRCEERS	RxxSxxpYxxxxxx
NP_000924.2	33469933	623	Y	RQMSRIyPKGGRV	RxxSxxpYxxxxxx
NP_877949.1	33469939	623	Y	RQMSRIyPKGGRV	RxxSxxpYxxxxxx
NP_057023.2	19923475	172	Y	RILSIMyYAREPG	RxxSxxpYxxxxxx
AAN32667.1	23451123	779	Y	RKLSLGyYDNDAG	RxxSxxpYxxxxxx
NP_073585.8	65288071	779	Y	RKLSLGyYDNDAG	RxxSxxpYxxxxxx
NP_056364.1	55749621	688	Y	RRESLSyIPKGLV	RxxSxxpYxxxxxx
NP_758872.1	27437001	420	Y	RNNSWLyQLAMDI	RxxSxxpYxxxxxx
NP_002229.1	4504831	393	Y	RNNSWLyQLAMDI	RxxSxxpYxxxxxx
NP_060757.4	26986534	243	Y	RPDSPVyANLQEL	RxxSxxpYxxxxxx
NP_958931.1	41871960	611	Y	RAASLNyLNQPSA	RxxSxxpYxxxxxx
NP_958929.1	41871946	593	Y	RAASLNyLNQPSA	RxxSxxpYxxxxxx
NP_958930.1	41871955	593	Y	RAASLNyLNQPSA	RxxSxxpYxxxxxx
NP_000866.1	4557665	1281	Y	REVSFYySEENKL	RxxSxxpYxxxxxx
NP_077001.1	13129100	141	Y	RSSSRKyTELPHG	RxxSxxpYxxxxxx
NP_892014.1	150378449	380	Y	RYLSLAyNKIAKE	RxxSxxpYxxxxxx
NP_055554.1	7661958	150	Y	SRSSSPySKSPVS	xxSxxxpYxxxxxx
NP_001070908.1	117938251	148	Y	SRSSSPySKSPVS	xxSxxxpYxxxxxx
NP_001070909.1	117938254	150	Y	SRSSSPySKSPVS	xxSxxxpYxxxxxx
NP_115285.1	15055543	160	Y	RYSRSPySRSPYS	xxSxxxpYxxxxxx
NP_057591.2	157817023	327	Y	GRSPSPyGRRRSS	xxSxxxpYxxxxxx
NP_037425.1	9558733	264	Y	RRSPSPyYSRYRS	xxSxxxpYxxxxxx
NP_057591.2	157817023	295	Y	TRSPSPySRRQRS	xxSxxxpYxxxxxx
NP_919223.1	34740329	360	Y	RSSGSPyGGGYGS	xxSxxxpYxxxxxx
NP_640337.3	189217897	678	Y	YGSNDPyRREPRS	xxSxxxpYxxxxxx
NP_003371.2	62414289	53	Y	STSRSLyASSPGG	xxSxxxpYxxxxxx
AAH42943.1	27695568	804	Y	SPSGYPySGPPPP	xxSxxxpYxxxxxx
NP_001073960.1	122937432	821	Y	SPSGYPySGPPPP	xxSxxxpYxxxxxx
NP_005427.2	46852390	356	Y	VSSPIPyTPSPSS	xxSxxxpYxxxxxx
NP_653205.3	255652953	695	Y	SGSGSSySGSSSR	xxSxxxpYxxxxxx
NP_002130.2	56699409	327	Y	GGSRDSySSSRSD	xxSxxxpYxxxxxx
NP_004584.1	4759098	268	Y	RRSPSPyYSRGGY	xxSxxxpYxxxxxx
NP_055554.1	7661958	133	Y	SRSRRSyRSSRSP	xxSxxxpYxxxxxx
NP_001070908.1	117938251	131	Y	SRSRRSyRSSRSP	xxSxxxpYxxxxxx
NP_001070909.1	117938254	133	Y	SRSRRSyRSSRSP	xxSxxxpYxxxxxx
NP_055452.3	224994160	30	Y	LWSRKPyGSSRSI	xxSxxxpYxxxxxx
BAC04560.1	21754769	37	Y	GSSGGGyGASKKK	xxSxxxpYxxxxxx
NP_919257.2	42822884	37	Y	GSSGGGyGASKKK	xxSxxxpYxxxxxx
NP_001092287.1	149408119	37	Y	GSSGGGyGASKKK	xxSxxxpYxxxxxx
NP_002130.2	56699409	320	Y	SSSRDGyGGSRDS	xxSxxxpYxxxxxx
NP_055885.3	116008442	374	Y	RRSASPyPSHSLS	xxSxxxpYxxxxxx
AAH45534.1	28278128	217	Y	SSSSEPyEEDEFN	xxSxxxpYxxxxxx
NP_064544.2	190358534	217	Y	SSSSEPyEEDEFN	xxSxxxpYxxxxxx
NP_037434.1	9558749	468	Y	SYSNRKyESDEDS	xxSxxxpYxxxxxx
NP_004987.2	134142337	920	Y	LSSSSSySGDISR	xxSxxxpYxxxxxx
NP_063956.1	9955958	878	Y	LSSSSSySGDISR	xxSxxxpYxxxxxx
NP_063957.1	9955960	871	Y	LSSSSSySGDISR	xxSxxxpYxxxxxx
NP_063953.2	134142345	864	Y	LSSSSSySGDISR	xxSxxxpYxxxxxx
NP_063915.2	134142340	861	Y	LSSSSSySGDISR	xxSxxxpYxxxxxx
NP_063955.2	134142335	920	Y	LSSSSSySGDISR	xxSxxxpYxxxxxx
NP_063954.2	134142342	805	Y	LSSSSSySGDISR	xxSxxxpYxxxxxx
NP_003039.2	15529998	667	Y	STSTSRyLSLPKN	xxSxxxpYxxxxxx
NP_631961.1	21327701	437	Y	RSSGGGySGDRSG	xxSxxxpYxxxxxx
NP_003478.1	4507353	434	Y	RSSGGGySGDRSG	xxSxxxpYxxxxxx
NP_005069.2	157384982	238	Y	KDSLSRyDSDGDK	xxSxxxpYxxxxxx
NP_476519.1	17432433	34	Y	AYSNPGySSFPSP	xxSxxxpYxxxxxx
NP_001017368.1	62865649	34	Y	AYSNPGySSFPSP	xxSxxxpYxxxxxx
NP_006734.1	5803137	118	Y	YGSGRYyDSRPGG	xxSxxxpYxxxxxx
NP_004030.1	4757756	238	Y	YKSYSPyDMLESI	xxSxxxpYxxxxxx
NP_001002858.1	50845388	256	Y	YKSYSPyDMLESI	xxSxxxpYxxxxxx
NP_001002857.1	50845386	238	Y	YKSYSPyDMLESI	xxSxxxpYxxxxxx
NP_055312.2	21626468	514	Y	SRSPMHyMYRPRS	xxSxxxpYxxxxxx
NP_001014972.1	62526045	514	Y	SRSPMHyMYRPRS	xxSxxxpYxxxxxx
BAA18998.1	1912057	87	Y	PQSSSPyYGSSAK	xxSxxxpYxxxxxx
NP_002850.2	170932516	87	Y	PQSSSPyYGSSAK	xxSxxxpYxxxxxx
NP_000284.1	4505783	29	Y	KRSGSVyEPLKSI	xxSxxxpYxxxxxx
NP_072174.3	66529407	796	Y	GRSYSPyDYQPCL	xxSxxxpYxxxxxx
AAH09107.1	14318618	720	Y	IKSGTPyRTPKSV	xxSxxxpYxxxxxx
NP_116233.2	172073175	719	Y	IKSGTPyRTPKSV	xxSxxxpYxxxxxx
NP_060300.1	8923427	73	Y	LSSHPKyGSIPKL	xxSxxxpYxxxxxx
NP_001073308.1	119874205	73	Y	LSSHPKyGSIPKL	xxSxxxpYxxxxxx
NP_001073309.1	119874207	73	Y	LSSHPKyGSIPKL	xxSxxxpYxxxxxx
NP_001073310.1	119874209	73	Y	LSSHPKyGSIPKL	xxSxxxpYxxxxxx
NP_001073311.1	119874211	73	Y	LSSHPKyGSIPKL	xxSxxxpYxxxxxx
NP_001007793.1	56118210	640	Y	GMSRDIySTDYYR	xxSxxxpYxxxxxx
NP_001012331.1	59889558	670	Y	GMSRDIySTDYYR	xxSxxxpYxxxxxx
NP_001027005.1	73611906	22	Y	LRSGSVyEPLKSI	xxSxxxpYxxxxxx
NP_361013.3	216548085	799	Y	TSSITIyPSDSSS	xxSxxxpYxxxxxx
NP_057417.3	118572613	996	Y	SGSISPyPKVKAQ	xxSxxxpYxxxxxx
NP_005648.1	5032189	522	Y	MLSTSEySQSPKM	xxSxxxpYxxxxxx
NP_004396.1	4758168	122	Y	YTSYAPyGTSSSP	xxSxxxpYxxxxxx
NP_006171.2	21361306	718	Y	GMSRDVySTDYYR	xxSxxxpYxxxxxx
NP_001018074.1	65506745	702	Y	GMSRDVySTDYYR	xxSxxxpYxxxxxx
NP_005076.3	33946327	1145	Y	MGSSVPySTAKTP	xxSxxxpYxxxxxx
NP_002028.1	4503823	30	Y	QSSGYRyGTDPTP	xxSxxxpYxxxxxx
NP_694592.1	23510362	30	Y	QSSGYRyGTDPTP	xxSxxxpYxxxxxx
NP_694593.1	23510364	30	Y	QSSGYRyGTDPTP	xxSxxxpYxxxxxx
NP_002339.2	55925578	626	Y	ESSATIyCSIRKP	xxSxxxpYxxxxxx
NP_071394.2	21735569	843	Y	EDSQDLyNASPEP	xxSxxxpYxxxxxx
NP_149106.2	34147456	669	Y	GRSSAPyFSAECP	xxSxxxpYxxxxxx
NP_065812.1	22094987	723	Y	LRSVSSyGNIRAV	xxSxxxpYxxxxxx
NP_055857.1	71725360	1269	Y	SYSFSPyGSKVSG	xxSxxxpYxxxxxx
NP_958782.1	41322916	4393	Y	VGSSSSyPISPAV	xxSxxxpYxxxxxx
NP_958785.1	41322914	4260	Y	VGSSSSyPISPAV	xxSxxxpYxxxxxx
NP_958786.1	41322923	4256	Y	VGSSSSyPISPAV	xxSxxxpYxxxxxx
NP_958780.1	41322912	4242	Y	VGSSSSyPISPAV	xxSxxxpYxxxxxx
NP_958781.1	41322908	4234	Y	VGSSSSyPISPAV	xxSxxxpYxxxxxx
NP_958783.1	41322910	4224	Y	VGSSSSyPISPAV	xxSxxxpYxxxxxx
NP_958784.1	41322919	4256	Y	VGSSSSyPISPAV	xxSxxxpYxxxxxx
NP_006173.2	62420884	736	Y	GMSRNLySGDYYR	xxSxxxpYxxxxxx
NP_001014796.1	62420886	736	Y	GMSRNLySGDYYR	xxSxxxpYxxxxxx
NP_000425.1	4557791	251	Y	GVSGIPyGQPKQE	xxSxxxpYxxxxxx
BAA18998.1	1912057	88	Y	QSSSPVyGSSAKT	xxSxxxpYxxxxxx
NP_002850.2	170932516	88	Y	QSSSPVyGSSAKT	xxSxxxpYxxxxxx
NP_060918.2	21361794	980	Y	LISGSSyARSSVV	xxSxxxpYxxxxxx
NP_683723.2	156671217	196	Y	GGSPASyHGSTSP	xxSxxxpYxxxxxx
NP_004584.1	4759098	68	Y	RSSRRHyTRSRSR	xxSxxxpYxxxxxx
NP_112420.1	14043070	341	Y	GRSSGPyGGGGQY	xxSxxxpYxxxxxx
NP_002127.1	4504445	289	Y	GRSSGPyGGGGQY	xxSxxxpYxxxxxx
NP_001011724.1	58761496	289	Y	GRSSGPyGGGGQY	xxSxxxpYxxxxxx
NP_001011725.1	58761498	289	Y	GRSSGPyGGGGQY	xxSxxxpYxxxxxx
NP_003137.1	4507241	311	Y	NMSGSLyEMVSRV	xxSxxxpYxxxxxx
NP_112214.1	13569922	267	Y	QISNGAyREPPKP	xxSxxxpYxxxxxx
NP_006097.1	5174751	357	Y	GLSMSSySVPRTP	xxSxxxpYxxxxxx
NP_077003.1	13129104	164	Y	PGSPEPyPGQQAP	xxSxxxpYxxxxxx
NP_031370.2	33356179	231	Y	KSSNREyETLAMP	xxSxxxpYxxxxxx
NP_005424.1	4885661	32	Y	STSVSHyGAEPTT	xxSxxxpYxxxxxx
NP_116114.1	14249338	320	Y	KNSKYEyDPDISP	xxSxxxpYxxxxxx
NP_000217.2	55956899	497	Y	GGSGGSyGGGGSG	xxSxxxpYxxxxxx
NP_061174.1	24308179	447	Y	SASSPGyQSSYQV	xxSxxxpYxxxxxx
NP_005900.2	153945728	1923	Y	SDSGYSyETIGKT	xxSxxxpYxxxxxx
NP_114399.1	14165456	1797	Y	SDSGYSyETIGKT	xxSxxxpYxxxxxx
NP_054700.2	83977452	798	Y	GMSRNLyAGDYYR	xxSxxxpYxxxxxx
NP_054699.2	83977450	792	Y	GMSRNLyAGDYYR	xxSxxxpYxxxxxx
NP_001945.3	38327632	755	Y	GMSRNLyAGDYYR	xxSxxxpYxxxxxx
NP_975010.1	42544182	224	Y	SNSKKIyGSQPNF	xxSxxxpYxxxxxx
NP_001712.1	4502435	224	Y	SNSKKIyGSQPNF	xxSxxxpYxxxxxx
NP_066124.1	10862703	900	Y	GLSRDVyEEDSYV	xxSxxxpYxxxxxx
NP_065681.1	10862701	900	Y	GLSRDVyEEDSYV	xxSxxxpYxxxxxx
NP_060561.3	23510283	202	Y	HTSNNIyEAVKYS	xxSxxxpYxxxxxx
NP_620305.1	21040326	1020	Y	ERSMMSyERSMMS	xxSxxxpYxxxxxx
NP_620303.1	21040320	701	Y	ERSMMSyERSMMS	xxSxxxpYxxxxxx
NP_115571.1	21040314	1020	Y	ERSMMSyERSMMS	xxSxxxpYxxxxxx
NP_620304.1	21040322	1020	Y	ERSMMSyERSMMS	xxSxxxpYxxxxxx
NP_478063.2	21040318	1020	Y	ERSMMSyERSMMS	xxSxxxpYxxxxxx
NP_003094.4	38146099	980	Y	ERSMMSyERSMMS	xxSxxxpYxxxxxx
NP_056518.2	25092725	23	Y	IPSPLGyAAIPIK	xxSxxxpYxxxxxx
NP_005547.3	67782365	40	Y	LGSSSLyGLGASR	xxSxxxpYxxxxxx
NP_037392.1	9994179	14	Y	LSSLAVyAEDSEP	xxSxxxpYxxxxxx
NP_002471.1	4505317	890	Y	TDSISRyETSSTS	xxSxxxpYxxxxxx
NP_003932.3	51702526	256	Y	ETSKVIyDFIEKT	xxSxxxpYxxxxxx
NP_009217.3	40353727	340	Y	VRSPPSySVLYPS	xxSxxxpYxxxxxx
NP_001103444.1	158303333	340	Y	VRSPPSySVLYPS	xxSxxxpYxxxxxx
NP_000217.2	55956899	485	Y	GGSGGSyGRGSRG	xxSxxxpYxxxxxx
NP_892006.2	154277116	8032	Y	SSSGVIyTVAKEE	xxSxxxpYxxxxxx
NP_598411.2	154277120	194	Y	SSSGVIyTVAKEE	xxSxxxpYxxxxxx
NP_149062.1	23097308	7961	Y	SSSGVIyTVAKEE	xxSxxxpYxxxxxx
NP_056108.2	154277118	2556	Y	SSSGVIyTVAKEE	xxSxxxpYxxxxxx
NP_001966.1	5803011	44	Y	GASTGIyEALELR	xxSxxxpYxxxxxx
NP_001419.1	4503571	44	Y	GASTGIyEALELR	xxSxxxpYxxxxxx
NP_001967.2	153267427	44	Y	GASTGIyEALELR	xxSxxxpYxxxxxx
NP_443739.2	153267448	44	Y	GASTGIyEALELR	xxSxxxpYxxxxxx
NP_005376.2	6631100	414	Y	SWSYNGyYSDLST	xxSxxxpYxxxxxx
NP_975010.1	42544182	216	Y	STSLAQyDSNSKK	xxSxxxpYxxxxxx
NP_001712.1	4502435	216	Y	STSLAQyDSNSKK	xxSxxxpYxxxxxx
NP_036466.2	154354979	1429	Y	HNSLDYyKSSEKN	xxSxxxpYxxxxxx
NP_002651.2	33598948	519	Y	TSSKIYySEETSS	xxSxxxpYxxxxxx
NP_877963.1	33598946	519	Y	TSSKIYySEETSS	xxSxxxpYxxxxxx
NP_062565.2	21361831	719	Y	RISHSLySGIEGL	xxSxxxpYxxxxxx
NP_997269.2	211904177	506	Y	SASNNSyATLGQS	xxSxxxpYxxxxxx
NP_680780.1	27262649	277	Y	DSSLSSyTVPLEK	xxSxxxpYxxxxxx
NP_009176.2	27262647	277	Y	DSSLSSyTVPLEK	xxSxxxpYxxxxxx
NP_059867.2	27262643	277	Y	DSSLSSyTVPLEK	xxSxxxpYxxxxxx
NP_663760.1	27262645	277	Y	DSSLSSyTVPLEK	xxSxxxpYxxxxxx
NP_680781.1	27262651	277	Y	DSSLSSyTVPLEK	xxSxxxpYxxxxxx
NP_680782.1	27262653	277	Y	DSSLSSyTVPLEK	xxSxxxpYxxxxxx
NP_001166.3	56676393	24	Y	LDSKLNyKPPPQK	xxSxxxpYxxxxxx
NP_065901.1	40538736	362	Y	PKSQDSyPGSPSL	xxSxxxpYxxxxxx
NP_006334.2	66932918	749	Y	GLSKKIySGDYYR	xxSxxxpYxxxxxx
NP_002095.1	4504235	187	Y	CNSQSYyNGDPFI	xxSxxxpYxxxxxx
NP_005900.2	153945728	1974	Y	EVSGYSyEKTERS	xxSxxxpYxxxxxx
NP_114399.1	14165456	1848	Y	EVSGYSyEKTERS	xxSxxxpYxxxxxx
NP_060896.1	55769589	106	Y	GDSHDRyERLTSV	xxSxxxpYxxxxxx
NP_000440.1	4557843	161	Y	GQSKYCySGIRRK	xxSxxxpYxxxxxx
NP_001020774.1	71040090	161	Y	GQSKYCySGIRRK	xxSxxxpYxxxxxx
NP_001322.1	10835010	96	Y	DHSHLLySTIPRM	xxSxxxpYxxxxxx
NP_001078927.1	146231940	96	Y	DHSHLLySTIPRM	xxSxxxpYxxxxxx
NP_001078928.1	146231962	96	Y	DHSHLLySTIPRM	xxSxxxpYxxxxxx
NP_001078929.1	146231938	96	Y	DHSHLLySTIPRM	xxSxxxpYxxxxxx
NP_001078930.1	146231968	96	Y	DHSHLLySTIPRM	xxSxxxpYxxxxxx
NP_001078931.1	146231942	96	Y	DHSHLLySTIPRM	xxSxxxpYxxxxxx
NP_689737.4	229892306	778	Y	KDSGNLyDSEIQN	xxSxxxpYxxxxxx
NP_060674.3	148664244	598	Y	NVSTTPyLQSVKK	xxSxxxpYxxxxxx
NP_001091995.1	148664201	599	Y	NVSTTPyLQSVKK	xxSxxxpYxxxxxx
NP_114432.1	14042978	921	Y	KYSTPPyLLEAAS	xxSxxxpYxxxxxx
NP_004730.2	14141170	437	Y	AQSLSPyTTSANR	xxSxxxpYxxxxxx
NP_542970.1	18426911	496	Y	EPSFSEyASVQVP	xxSxxxpYxxxxxx
NP_001035111.1	91105764	496	Y	EPSFSEyASVQVP	xxSxxxpYxxxxxx
NP_001035112.1	91105767	496	Y	EPSFSEyASVQVP	xxSxxxpYxxxxxx
NP_001558.3	222136583	671	Y	RGSRDTyAWHKQK	xxSxxxpYxxxxxx
NP_000415.2	119395754	66	Y	YGSRSLyNLGGSK	xxSxxxpYxxxxxx
NP_003529.1	4504301	52	Y	RISGLIyEETRGV	xxSxxxpYxxxxxx
NP_658988.2	146260268	418	Y	LISVGSyKSSVES	xxSxxxpYxxxxxx
NP_000015.1	4501969	350	Y	RSSLKAyGNGYSS	xxSxxxpYxxxxxx
NP_037418.3	54607124	566	Y	RNSLEGySRSVRS	xxSxxxpYxxxxxx
NP_009298.1	6382062	568	Y	SSSVVPyLPRLPI	xxSxxxpYxxxxxx
NP_005149.3	153266757	532	Y	SSSVVPyLPRLPI	xxSxxxpYxxxxxx
NP_062556.2	21361809	288	Y	RDSYESyGNSRSA	xxSxxxpYxxxxxx
NP_057023.2	19923475	173	Y	ILSIMYyAREPGK	xxSxxxpYxxxxxx
NP_005900.2	153945728	1830	Y	AASAEPyGFRASV	xxSxxxpYxxxxxx
NP_114399.1	14165456	1704	Y	AASAEPyGFRASV	xxSxxxpYxxxxxx
NP_003310.3	110349715	13084	Y	DASKAAyARDPQY	xxSxxxpYxxxxxx
NP_596869.3	110349719	19581	Y	DASKAAyARDPQY	xxSxxxpYxxxxxx
NP_597676.2	110349713	13209	Y	DASKAAyARDPQY	xxSxxxpYxxxxxx
NP_597681.2	110349717	13276	Y	DASKAAyARDPQY	xxSxxxpYxxxxxx
NP_004701.1	4759202	203	Y	GASVDNyQQPPFT	xxSxxxpYxxxxxx
NP_065394.1	10092597	218	Y	LESSSSyKNLTLK	xxSxxxpYxxxxxx
NP_510880.2	28416946	2035	Y	NTSRPRySHSYLS	xxSxxxpYxxxxxx
NP_976063.1	42794779	2020	Y	NTSRPRySHSYLS	xxSxxxpYxxxxxx
NP_003889.1	26190608	130	Y	LSSGVFyFSWPND	xxSxxxpYxxxxxx
NP_149014.3	42475970	251	Y	PTSFRPyEVGPAA	xxSxxxpYxxxxxx
NP_062565.2	21361831	489	Y	GGSAPIyVKNILP	xxSxxxpYxxxxxx
NP_060710.3	166295173	621	Y	PSSRAVyYADYRA	xxSxxxpYxxxxxx
NP_003028.1	4506969	281	Y	KKSLTIyAQVQKP	xxSxxxpYxxxxxx
NP_001894.2	55770844	619	Y	DASRLVyDGIRDI	xxSxxxpYxxxxxx
NP_003028.1	4506969	327	Y	TNSITVyASVTLP	xxSxxxpYxxxxxx
NP_004437.2	62241042	827	Y	LESKSLyDEVAAQ	xxSxxxpYxxxxxx
NP_079100.2	40804742	531	Y	VPSPPGyMSDQEE	xxSxxxpYxxxxxx
NP_056051.2	163792198	795	Y	EFSNKVyLADPVV	xxSxxxpYxxxxxx
NP_002264.1	4504919	25	Y	AFSSRSyTSGPGS	xxSxxxpYxxxxxx
NP_000199.2	119395736	999	Y	ASSNPEyLSASDV	xxSxxxpYxxxxxx
NP_001073285.1	119395738	987	Y	ASSNPEyLSASDV	xxSxxxpYxxxxxx
NP_055417.1	23943912	1291	Y	SPSVSYyRKIIEG	xxSxxxpYxxxxxx
NP_056976.2	45505173	221	Y	TNSYVLySKRFRS	xxSxxxpYxxxxxx
NP_001092108.1	148839382	697	Y	KGSVDQyLLRSSN	xxSxxxpYxxxxxx
NP_054782.2	21361670	140	Y	KASGANySFHKES	xxSxxxpYxxxxxx
NP_001014436.1	62198235	140	Y	KASGANySFHKES	xxSxxxpYxxxxxx
NP_003160.2	20149524	717	Y	RISQGPyKGYIGV	xxSxxxpYxxxxxx
NP_004888.2	19923761	383	Y	LLSLMGyFKDKEP	xxSxxxpYxxxxxx
NP_006833.2	55749531	806	Y	MGSTHIyDMSTVM	xxSxxxpYxxxxxx
NP_056185.1	7657194	15	Y	DPSIPIyGLRQSI	xxSxxxpYxxxxxx
NP_001448.2	105990514	2501	Y	RSSTETyYSAIPK	xxSxxxpYxxxxxx
NP_003243.1	4507499	50	Y	HTSNDPyCFVEFY	xxSxxxpYxxxxxx
NP_001029097.1	77695912	67	Y	HTSNDPyCFVEFY	xxSxxxpYxxxxxx
NP_060089.1	40538732	159	Y	LNSCLKyMYPPPS	xxSxxxpYxxxxxx
NP_006102.2	167614485	127	Y	SMSQAPyCVRNVR	xxSxxxpYxxxxxx
NP_644805.1	21618340	705	Y	PGSAAPyLKTKFI	xxSxxxpYxxxxxx
NP_998827.1	47458820	705	Y	PGSAAPyLKTKFI	xxSxxxpYxxxxxx
NP_056646.1	7710112	164	Y	ASSLDVyDGRFLV	xxSxxxpYxxxxxx
NP_000656.1	4557239	164	Y	ASSLDVyDGRFLV	xxSxxxpYxxxxxx
NP_000368.1	4507909	291	Y	ETSKLIyDFIEDQ	xxSxxxpYxxxxxx
NP_002989.2	40548378	191	Y	KPSSAAyQKAPTK	xxSxxxpYxxxxxx
NP_060436.4	57863314	284	Y	GASGPGyPLRGGR	xxSxxxpYxxxxxx
NP_006280.3	223029410	26	Y	EPSTMVyDACRII	xxSxxxpYxxxxxx
NP_001606.1	4501889	363	Y	WISKPEyDEAGPS	xxSxxxpYxxxxxx
NP_004971.2	27436984	441	Y	TGSSNAyLHSKRN	xxSxxxpYxxxxxx
NP_751948.1	27436986	441	Y	TGSSNAyLHSKRN	xxSxxxpYxxxxxx
NP_068592.1	11141893	44	Y	ASSQETyGKSPFW	xxSxxxpYxxxxxx
NP_001026882.2	94420683	44	Y	ASSQETyGKSPFW	xxSxxxpYxxxxxx
NP_000465.1	4507741	103	Y	GGSPQSyEELQTQ	xxSxxxpYxxxxxx
NP_057211.4	42476193	117	Y	VVSCEGyESSEDQ	xxSxxxpYxxxxxx
NP_005772.3	56549666	859	Y	KVSSTHyYLLPER	xxSxxxpYxxxxxx
NP_001010938.1	58331191	937	Y	KVSSTHyYLLPER	xxSxxxpYxxxxxx
NP_061821.1	10047086	394	Y	KVSSTHyYLLPER	xxSxxxpYxxxxxx
NP_061848.2	52627149	32	Y	GSSMSFyVRPSPA	xxSxxxpYxxxxxx
CAB66809.1	12053255	198	Y	SGSVQVyTIDNST	xxSxxxpYxxxxxx
NP_065880.1	75832029	198	Y	SGSVQVyTIDNST	xxSxxxpYxxxxxx
NP_005772.3	56549666	860	Y	VSSTHYyLLPERP	xxSxxxpYxxxxxx
NP_001010938.1	58331191	938	Y	VSSTHYyLLPERP	xxSxxxpYxxxxxx
NP_061821.1	10047086	395	Y	VSSTHYyLLPERP	xxSxxxpYxxxxxx
NP_000620.2	46488932	481	Y	SSSIDEyFSEQPL	xxSxxxpYxxxxxx
NP_072174.3	66529407	1404	Y	AGSLPNyATINGK	xxSxxxpYxxxxxx
NP_055928.3	73747881	2411	Y	ILSIMLySSKKEI	xxSxxxpYxxxxxx
NP_003512.1	4504263	43	Y	SYSVYVyKVLKQV	xxSxxxpYxxxxxx
NP_001007793.1	56118210	645	Y	IYSTDYyRVGGRT	xxSxxxpYxxxxxx
NP_001012331.1	59889558	675	Y	IYSTDYyRVGGRT	xxSxxxpYxxxxxx
NP_055885.3	116008442	905	Y	KESSRRyEEQELK	xxSxxxpYxxxxxx
NP_003212.2	118582289	246	Y	LSSTSKyKVTVGE	xxSxxxpYxxxxxx
NP_000928.1	4505939	1853	Y	SPSSPEyTPTSPK	xxSxxxpYxxxxxx
NP_060414.3	71774197	748	Y	EQSPVSySKRTAY	xxSxxxpYxxxxxx
NP_872363.1	32698936	1487	Y	LDSQMGyLPAPGG	xxSxxxpYxxxxxx
NP_001272.2	50428925	114	Y	TISQEAyDQRQDT	xxSxxxpYxxxxxx
NP_057376.2	155722983	366	Y	GSSVALySRKVLI	xxSxxxpYxxxxxx
NP_003225.2	189458817	503	Y	SASPLLyTLIEKT	xxSxxxpYxxxxxx
NP_056111.1	24308029	917	Y	LRSYVKyAYKAEP	xxSxxxpYxxxxxx
NP_000204.3	54607035	1469	Y	TTSAAAyGTHLSP	xxSxxxpYxxxxxx
NP_001005619.1	54607027	1399	Y	TTSAAAyGTHLSP	xxSxxxpYxxxxxx
NP_001005731.1	54607033	1399	Y	TTSAAAyGTHLSP	xxSxxxpYxxxxxx
NP_002825.3	33356177	580	Y	EDSARVyENVGLM	xxSxxxpYxxxxxx
NP_001541.2	55953129	116	Y	LASKMLyEFILER	xxSxxxpYxxxxxx
NP_001007246.1	55953131	116	Y	LASKMLyEFILER	xxSxxxpYxxxxxx
NP_004863.2	20070191	209	Y	SLSKMSyLQMRNS	xxSxxxpYxxxxxx
NP_059143.3	154426302	83	Y	KLSKSTyEEVKTI	xxSxxxpYxxxxxx
NP_056272.2	41152072	533	Y	EPSPVRyDNLSRH	xxSxxxpYxxxxxx
NP_003168.2	21361553	323	Y	TVSFNPyEPELAP	xxSxxxpYxxxxxx
NP_056981.2	24850133	274	Y	SYSVALyLVRQLT	xxSxxxpYxxxxxx
NP_690869.1	23097254	91	Y	LNSTSMyLVSGGL	xxSxxxpYxxxxxx
NP_003473.3	148762969	2299	Y	GASSPSyGPPNLG	xxSxxxpYxxxxxx
NP_002600.1	4505683	1009	Y	DTSSVLyTAVQPN	xxSxxxpYxxxxxx
NP_001008701.1	57165355	1451	Y	RPSHEGyLAAPGL	xxSxxxpYxxxxxx
NP_055736.2	41281557	1446	Y	RPSHEGyLAAPGL	xxSxxxpYxxxxxx
NP_004318.3	82546843	360	Y	SPSPTTyRMFRDK	xxSxxxpYxxxxxx
NP_067585.2	82546845	360	Y	SPSPTTyRMFRDK	xxSxxxpYxxxxxx
NP_115834.1	28557677	124	Y	KPSQGIyMVYCRK	xxSxxxpYxxxxxx
NP_001015877.1	62865858	124	Y	KPSQGIyMVYCRK	xxSxxxpYxxxxxx
NP_115711.2	63478060	124	Y	KPSQGIyMVYCRK	xxSxxxpYxxxxxx
NP_002447.4	65301117	261	Y	GGSSLSyTNPAVA	xxSxxxpYxxxxxx
NP_001018016.1	67189007	252	Y	GGSSLSyTNPAVA	xxSxxxpYxxxxxx
NP_001018017.1	67189069	243	Y	GGSSLSyTNPAVA	xxSxxxpYxxxxxx
NP_001037855.1	113206024	191	Y	GGSSLSyTNPAVA	xxSxxxpYxxxxxx
NP_001037856.1	113206026	138	Y	GGSSLSyTNPAVA	xxSxxxpYxxxxxx
NP_001037857.1	113206028	147	Y	GGSSLSyTNPAVA	xxSxxxpYxxxxxx
NP_006716.3	194018748	629	Y	TSSGEWyQNFQPP	xxSxxxpYxxxxxx
NP_006173.2	62420884	741	Y	LYSGDYyRIQGRA	xxSxxxpYxxxxxx
NP_057518.1	7706541	175	Y	SRSCHFyNNVEEK	xxSxxxpYxxxxxx
NP_116575.2	91984775	175	Y	SRSCHFyNNVEEK	xxSxxxpYxxxxxx
NP_689914.2	31657092	4548	Y	LLSLFGyATLPWM	xxSxxxpYxxxxxx
NP_060519.1	8922333	118	Y	RRSLIFyRNEIRK	xxSxxxpYxxxxxx
NP_055977.3	27477105	138	Y	HISYSQyYLLARR	xxSxxxpYxxxxxx
NP_055417.1	23943912	1038	Y	TRSILTySRIGGR	xxSxxxpYxxxxxx
NP_055855.2	121583483	92	Y	VRSPTPyKKQLNE	xxSxxxpYxxxxxx
NP_689884.1	22749359	92	Y	VRSPTPyKKQLNE	xxSxxxpYxxxxxx
NP_115558.3	148529023	173	Y	NTSQQEyKVSSVP	xxSxxxpYxxxxxx
NP_115833.1	14589935	933	Y	SPSMGRyRSVNGG	xxSxxxpYxxxxxx
NP_115832.1	14589933	980	Y	SPSMGRyRSVNGG	xxSxxxpYxxxxxx
NP_002580.2	14589931	980	Y	SPSMGRyRSVNGG	xxSxxxpYxxxxxx
NP_000409.1	4557669	713	Y	LGSGIVySALTCH	xxSxxxpYxxxxxx
NP_004983.1	4826830	120	Y	GRSAGKyDVYLIN	xxSxxxpYxxxxxx
AAN32667.1	23451123	780	Y	KLSLGQyDNDAGG	xxSxxxpYxxxxxx
NP_073585.8	65288071	780	Y	KLSLGQyDNDAGG	xxSxxxpYxxxxxx
NP_076416.2	226443007	106	Y	SSSSSQyKANMHF	xxSxxxpYxxxxxx
NP_002071.2	73486658	420	Y	TSSNVGyLAHAIH	xxSxxxpYxxxxxx
NP_005745.1	5031703	174	Y	DDSGTFyDQAVVS	xxSxxxpYxxxxxx
NP_938405.1	38327552	174	Y	DDSGTFyDQAVVS	xxSxxxpYxxxxxx
NP_006334.2	66932918	754	Y	IYSGDYyRQGRIA	xxSxxxpYxxxxxx
AAD42222.1	5353738	509	Y	LGSKFRySGRTQA	xxSxxxpYxxxxxx
NP_976218.1	42716289	474	Y	LGSKFRySGRTQA	xxSxxxpYxxxxxx
NP_976217.1	42716291	300	Y	LGSKFRySGRTQA	xxSxxxpYxxxxxx
NP_004428.1	4758274	300	Y	LGSKFRySGRTQA	xxSxxxpYxxxxxx
NP_000862.1	4504545	125	Y	LISLDRyLLILSP	xxSxxxpYxxxxxx
NP_004652.2	118402596	308	Y	TFSNLLyVRSMKS	xxSxxxpYxxxxxx
NP_009114.1	6005830	327	Y	LPSAVKyLMASDP	xxSxxxpYxxxxxx
NP_009114.1	6005830	84	Y	GTSRGQyHTLQAG	xxSxxxpYxxxxxx
NP_008965.2	6631085	252	Y	DGSNIIyTAKISL	xxSxxxpYxxxxxx
NP_060255.3	157388975	508	Y	EKSVSIyTPVVSL	xxSxxxpYxxxxxx
NP_940682.2	114520607	679	Y	RGSLQAyTFEEQP	xxSxxxpYxxxxxx
NP_006145.2	114520609	332	Y	RGSLQAyTFEEQP	xxSxxxpYxxxxxx
NP_001408.2	50053795	593	Y	FSSASKyAALSVD	xxSxxxpYxxxxxx
NP_036440.1	16306580	1094	Y	VGSSTRySLTELN	xxSxxxpYxxxxxx
NP_036552.1	6912630	133	Y	LSSPSNyKLECPE	xxSxxxpYxxxxxx
NP_055615.8	18765700	216	Y	LNSHDLyQKVAQE	xxSxxxpYxxxxxx
NP_660205.3	262118306	108	Y	HWSLLVyLQDKNS	xxSxxxpYxxxxxx
NP_055839.3	154448892	573	Y	QKSSKLyRRLSEV	xxSxxxpYxxxxxx
NP_064522.3	46592991	672	Y	SISSFSyREILRE	xxSxxxpYxxxxxx
NP_997555.1	46593000	593	Y	SISSFSyREILRE	xxSxxxpYxxxxxx
NP_005808.3	255958282	95	Y	IASASEyAHRGLD	xxSxxxpYxxxxxx
NP_004290.2	42490749	287	Y	LVSGVLyYKCGAQ	xxSxxxpYxxxxxx
NP_003487.1	4507691	892	Y	SISHVAyRVLGKF	xxSxxxpYxxxxxx
NP_004062.2	67551261	345	Y	LVSTRHyRAPEVI	xxSxxxpYxxxxxx
NP_891988.1	33636742	437	Y	ALSPDGyYARSED	xxSxxxpYxxxxxx
NP_000926.2	62739166	437	Y	ALSPDGyYARSED	xxSxxxpYxxxxxx
NP_006247.1	5453974	635	Y	PQSGLEySGIQEL	xxSxxxpYxxxxxx
NP_055873.1	57863271	741	Y	AVSAPIyNAHEKM	xxSxxxpYxxxxxx
NP_001009814.1	57863273	741	Y	AVSAPIyNAHEKM	xxSxxxpYxxxxxx
NP_062536.2	50843820	244	Y	DESRNVyYELNDV	xxSxxxpYxxxxxx
NP_001091970.1	148612813	164	Y	DESRNVyYELNDV	xxSxxxpYxxxxxx
NP_001091971.1	148612857	244	Y	DESRNVyYELNDV	xxSxxxpYxxxxxx
NP_036442.3	116686122	1020	Y	PDSSFEyVPPKPK	xxSxxxpYxxxxxx
NP_055524.3	110347427	3415	Y	NSSVKEyRMEVPS	xxSxxxpYxxxxxx
NP_003371.2	62414289	30	Y	PSSSRSyVTTSTR	xxSxxxpYxxxxxx
NP_056128.1	7662088	546	Y	KSSTMQyVILMYM	xxSxxxpYxxxxxx
NP_005535.1	5031805	896	Y	PKSPGEyVNIEFG	xxSxxxpYxxxxxx
NP_000015.1	4501969	141	Y	ITSPFKyQSLLTK	xxSxxxpYxxxxxx
NP_006013.1	5174729	68	Y	VKSHLMyAVREEV	xxSxxxpYxxxxxx
NP_009058.2	194394237	60	Y	TASSLSyDIHYWI	xxSxxxpYxxxxxx
NP_001073895.1	122937243	589	Y	DVSLTAyQAWKLK	xxSxxxpYxxxxxx
NP_006171.2	21361306	723	Y	VYSTDYyRVGGHT	xxSxxxpYxxxxxx
NP_001018074.1	65506745	707	Y	VYSTDYyRVGGHT	xxSxxxpYxxxxxx
CAA77669.1	35119	1876	Y	LLSLPGyRPTTRS	xxSxxxpYxxxxxx
NP_006176.2	71361682	1876	Y	LLSLPGyRPTTRS	xxSxxxpYxxxxxx
NP_002784.1	4506193	125	Y	MLSTILySRRFFP	xxSxxxpYxxxxxx
NP_000089.1	4503023	202	Y	PSSLSWyGAYLVN	xxSxxxpYxxxxxx
NP_003310.3	110349715	17784	Y	LSSGQEyQFRVKA	xxSxxxpYxxxxxx
NP_596869.3	110349719	24281	Y	LSSGQEyQFRVKA	xxSxxxpYxxxxxx
NP_597676.2	110349713	17909	Y	LSSGQEyQFRVKA	xxSxxxpYxxxxxx
NP_597681.2	110349717	17976	Y	LSSGQEyQFRVKA	xxSxxxpYxxxxxx
NP_006716.3	194018748	327	Y	SLSGRMyYSCNGE	xxSxxxpYxxxxxx
NP_653224.2	68448501	598	Y	QGSNRRyQVSALH	xxSxxxpYxxxxxx
NP_001034589.2	210147462	881	Y	QGSNRRyQVSALH	xxSxxxpYxxxxxx
NP_848658.1	42558243	483	Y	DRSKTLyLQQRIF	xxSxxxpYxxxxxx
NP_002822.2	18104989	61	Y	QNSGDFyDLYGGE	xxSxxxpYxxxxxx
NP_536858.1	18104991	63	Y	QNSGDFyDLYGGE	xxSxxxpYxxxxxx
NP_536859.1	18104993	61	Y	QNSGDFyDLYGGE	xxSxxxpYxxxxxx
AAH07560.1	14043145	171	Y	PTSAPVyQQPQQQ	xxSxxxpYxxxxxx
NP_006139.1	5453710	171	Y	PTSAPVyQQPQQQ	xxSxxxpYxxxxxx
NP_004534.2	115527120	6340	Y	NISSVLyKENLGK	xxSxxxpYxxxxxx
NP_060808.2	31377846	497	Y	DCSVRIyDFASKT	xxSxxxpYxxxxxx
NP_006357.1	5453593	316	Y	PTSPKSyPSQKHA	xxSxxxpYxxxxxx
NP_000381.1	9966761	237	Y	LVSKLLySRGLLI	xxSxxxpYxxxxxx
NP_060611.2	16554607	127	Y	LQSVHIyKKHRVQ	xxSxxxpYxxxxxx
NP_060604.2	229892326	187	Y	INSRKEyLLLKQT	xxSxxxpYxxxxxx
NP_005426.2	50959191	1097	Y	NSSQLLyQEYSDV	xxSxxxpYxxxxxx
NP_000106.1	4557547	200	Y	ALSIDRyRAVASW	xxSxxxpYxxxxxx
NP_003982.1	4503467	200	Y	ALSIDRyRAVASW	xxSxxxpYxxxxxx
NP_055181.3	45593130	194	Y	LESWLNyLKKELP	xxSxxxpYxxxxxx
NP_996561.1	45643127	182	Y	LESWLNyLKKELP	xxSxxxpYxxxxxx
NP_996562.1	45643129	182	Y	LESWLNyLKKELP	xxSxxxpYxxxxxx
NP_057234.2	18252778	222	Y	VESKNAyGITPLF	xxSxxxpYxxxxxx
NP_680780.1	27262649	309	Y	IESSPQyRLRIAM	xxSxxxpYxxxxxx
NP_009176.2	27262647	309	Y	IESSPQyRLRIAM	xxSxxxpYxxxxxx
NP_059867.2	27262643	309	Y	IESSPQyRLRIAM	xxSxxxpYxxxxxx
NP_663760.1	27262645	309	Y	IESSPQyRLRIAM	xxSxxxpYxxxxxx
NP_680781.1	27262651	309	Y	IESSPQyRLRIAM	xxSxxxpYxxxxxx
NP_680782.1	27262653	309	Y	IESSPQyRLRIAM	xxSxxxpYxxxxxx
NP_006582.1	38492356	101	Y	TASIHVySIQKAM	xxSxxxpYxxxxxx
NP_060844.2	40254893	50	Y	DVSQFPyVEFTGR	xxSxxxpYxxxxxx
NP_112241.2	45238849	8	Y	NPSTPSyPTASLY	xxSxxxpYxxxxxx
NP_000108.1	4557553	167	Y	YQSITHyRPVSAS	xxSxxxpYxxxxxx
NP_061872.2	80861486	315	Y	VTSTLGyRMVHPS	xxSxxxpYxxxxxx
NP_758953.1	27312029	392	Y	TKSFGRyPSLMEN	xxSxxxpYxxxxxx
NP_115941.2	94967023	917	Y	LLSTLQyPRPSSG	xxSxxxpYxxxxxx
NP_619723.1	41281683	821	Y	LLSTLQyPRPSSG	xxSxxxpYxxxxxx
NP_003571.2	31543297	397	Y	HYSSPGyVLFYLV	xxSxxxpYxxxxxx
NP_003033.3	188528618	107	Y	ECSLGQyTSIGGL	xxSxxxpYxxxxxx
NP_001021.1	4506711	31	Y	VQSPNSyFMDVKC	xxSxxxpYxxxxxx
NP_113664.1	13899332	283	Y	KTSAVNyMTQVVR	xxSxxxpYxxxxxx
NP_006753.1	5803056	57	Y	KLSQMGyLRIADL	xxSxxxpYxxxxxx
NP_060204.1	8923243	257	Y	SKSPTEyHEPVYA	xxSxxxpYxxxxxx
NP_005632.1	5032147	606	Y	PGSVQKyIVVSLP	xxSxxxpYxxxxxx
NP_620834.1	21536355	596	Y	PGSVQKyIVVSLP	xxSxxxpYxxxxxx
NP_620835.1	21536357	596	Y	PGSVQKyIVVSLP	xxSxxxpYxxxxxx
NP_647476.1	21536359	606	Y	PGSVQKyIVVSLP	xxSxxxpYxxxxxx
NP_003449.2	91208420	2090	Y	EASLAQySATTAR	xxSxxxpYxxxxxx
NP_055238.1	7656879	502	Y	IPSSQGyKKEGRE	xxSxxxpYxxxxxx
NP_056120.2	224282153	351	Y	CASPVEyFRPGLE	xxSxxxpYxxxxxx
NP_005408.1	4885609	216	Y	LDSGGFyITSRTQ	xxSxxxpYxxxxxx
NP_938033.1	38202217	216	Y	LDSGGFyITSRTQ	xxSxxxpYxxxxxx
NP_004801.1	4758476	45	Y	LGSQEGyVPKNFI	xxSxxxpYxxxxxx
NP_115545.3	38505218	28	Y	SKSLEAyLNQHLS	xxSxxxpYxxxxxx
NP_060606.3	126116596	2136	Y	HQSRISyHTMRKA	xxSxxxpYxxxxxx
NP_005637.3	110825988	1289	Y	NFSVRLyALVALK	xxSxxxpYxxxxxx
NP_055872.3	126116565	380	Y	KKSWLGyAQGYLL	xxSxxxpYxxxxxx
NP_002600.1	4505683	716	Y	PPSAELySNALPV	xxSxxxpYxxxxxx
NP_004438.3	56682953	484	Y	EHSSVSyYHPADG	xxSxxxpYxxxxxx
NP_955356.1	40807496	394	Y	EESRLLyEIQNRD	xxSxxxpYxxxxxx
NP_055891.1	30387611	296	Y	NSSLIKyMEKHKV	xxSxxxpYxxxxxx
NP_391987.1	19743817	400	Y	TISYKSyCKNGVN	xxSxxxpYxxxxxx
NP_002202.2	19743813	400	Y	TISYKSyCKNGVN	xxSxxxpYxxxxxx
NP_389647.1	19743815	400	Y	TISYKSyCKNGVN	xxSxxxpYxxxxxx
NP_391988.1	19743819	400	Y	TISYKSyCKNGVN	xxSxxxpYxxxxxx
NP_391989.1	19743821	400	Y	TISYKSyCKNGVN	xxSxxxpYxxxxxx
NP_596867.1	19743823	400	Y	TISYKSyCKNGVN	xxSxxxpYxxxxxx
NP_055937.1	29789054	141	Y	PKSRENyLNRCMD	xxSxxxpYxxxxxx
AAH07560.1	14043145	122	Y	QISNIKyHEEFEK	xxSxxxpYxxxxxx
NP_006139.1	5453710	122	Y	QISNIKyHEEFEK	xxSxxxpYxxxxxx
NP_001059.2	19913408	1448	Y	LFSFPSySQKSED	xxSxxxpYxxxxxx
NP_060288.3	224586777	131	Y	SVSYIKyPKACLQ	xxSxxxpYxxxxxx
NP_997202.2	47271500	11	Y	RYSVKVyVLNEDE	xxSxxxpYxxxxxx
NP_004757.1	4758032	354	Y	MGSCEIyPQTIQH	xxSxxxpYxxxxxx
NP_036585.1	7549793	104	Y	FSSNGKyLATCAD	xxSxxxpYxxxxxx
NP_003745.1	4503519	216	Y	RMSIKAyVSTLMG	xxSxxxpYxxxxxx
NP_055606.1	7661974	122	Y	IVSAVAyVHSQGY	xxSxxxpYxxxxxx
NP_115814.1	55770870	453	Y	HFSWDKyLEETNS	xxSxxxpYxxxxxx
NP_001007103.1	55770872	428	Y	HFSWDKyLEETNS	xxSxxxpYxxxxxx
NP_115796.2	27754773	456	Y	SDSKKKyFLQTTT	xxSxxxpYxxxxxx
NP_002578.2	27754771	456	Y	SDSKKKyFLQTTT	xxSxxxpYxxxxxx
NP_114432.1	14042978	1011	Y	FNSLGQyFTGKIP	xxSxxxpYxxxxxx
NP_004965.1	4826782	415	Y	IVSNFNyFYHRET	xxSxxxpYxxxxxx
NP_004590.2	27477113	840	Y	FSSALEyLKLLHS	xxSxxxpYxxxxxx
NP_653259.3	145699123	1506	Y	EASALLyLLMRNN	xxSxxxpYxxxxxx
NP_003839.2	157779135	153	Y	DISRETyLAILMD	xxSxxxpYxxxxxx
NP_116750.1	14589920	642	Y	QESYTFyVKAEDG	xxSxxxpYxxxxxx
NP_116751.1	14589922	642	Y	QESYTFyVKAEDG	xxSxxxpYxxxxxx
NP_116749.1	14589918	642	Y	QESYTFyVKAEDG	xxSxxxpYxxxxxx
NP_055337.1	7657443	642	Y	QESYTFyVKAEDG	xxSxxxpYxxxxxx
NP_001073901.1	122937263	199	Y	IKSRAAyNVTLLN	xxSxxxpYxxxxxx
NP_009153.3	63079680	289	Y	VNSIPTyNAALDN	xxSxxxpYxxxxxx
NP_001017926.1	63079683	289	Y	VNSIPTyNAALDN	xxSxxxpYxxxxxx
NP_002750.1	4506103	101	Y	GLSMGNyIGLINR	xxSxxxpYxxxxxx
NP_006491.2	71274107	202	Y	VESSGLyTLQSIL	xxSxxxpYxxxxxx
NP_055109.1	7657655	246	Y	YFSNEKyQKGFSL	xxSxxxpYxxxxxx
NP_004563.2	148664226	86	Y	TSSVPEyVYNLHL	xxSxxxpYxxxxxx
NP_001005242.2	148664186	86	Y	TSSVPEyVYNLHL	xxSxxxpYxxxxxx
NP_006258.3	150418007	2609	Y	EESSINyTFKTPE	xxSxxxpYxxxxxx
NP_001340.2	45439306	253	Y	AQSPQLyKQMCIC	xxSxxxpYxxxxxx
NP_006089.1	5174447	246	Y	CFSPNRyWLCAAT	xxSxxxpYxxxxxx
NP_003595.1	4504733	700	Y	EDEDDPyVPMRPG	xxxDxxpYxxxxxx
NP_002600.1	4505683	740	Y	GESDGGyMDMSKD	xxxDxxpYxxxxxx
NP_003293.2	91208423	122	Y	RRPDRQyYEPPPP	xxxDxxpYxxxxxx
NP_991403.1	45545424	535	Y	RSRDDLyDQDDSR	xxxDxxpYxxxxxx
NP_057009.3	45505163	516	Y	RSRDDLyDQDDSR	xxxDxxpYxxxxxx
NP_991404.1	45593136	467	Y	RSRDDLyDQDDSR	xxxDxxpYxxxxxx
NP_003206.2	130977759	519	Y	YVLDDQyTSSSGA	xxxDxxpYxxxxxx
NP_003277.1	11225260	125	Y	EPEDDGyFVPPKE	xxxDxxpYxxxxxx
NP_003319.2	148596974	420	Y	YVLDDEyVSSFGA	xxxDxxpYxxxxxx
NP_004209.2	190358517	8	Y	GTRDDEyDYLFKV	xxxDxxpYxxxxxx
NP_004654.1	4758984	8	Y	GTRDDEyDYLFKV	xxxDxxpYxxxxxx
NP_000064.1	4557429	171	Y	DREDDQySHLQGN	xxxDxxpYxxxxxx
NP_116114.1	14249338	494	Y	SERDELyAQWGKG	xxxDxxpYxxxxxx
NP_005179.2	52426745	700	Y	GEEDTEyMTPSSR	xxxDxxpYxxxxxx
NP_005598.3	27886593	598	Y	YMEDSTyYKASKG	xxxDxxpYxxxxxx
NP_722560.1	24476013	576	Y	YMEDSTyYKASKG	xxxDxxpYxxxxxx
NP_001387.2	18765758	145	Y	GYDDDNyDYIVKN	xxxDxxpYxxxxxx
NP_569120.1	18765752	136	Y	GYDDDNyDYIVKN	xxxDxxpYxxxxxx
NP_567824.1	18765750	145	Y	GYDDDNyDYIVKN	xxxDxxpYxxxxxx
NP_569121.1	18765754	145	Y	GYDDDNyDYIVKN	xxxDxxpYxxxxxx
NP_569122.1	18765756	145	Y	GYDDDNyDYIVKN	xxxDxxpYxxxxxx
NP_919261.2	51702222	597	Y	DDDDDEyDSEMED	xxxDxxpYxxxxxx
NP_003740.2	38683860	653	Y	LGADDGyMPMTPG	xxxDxxpYxxxxxx
NP_001973.2	54792100	1197	Y	EDEDEEyEYMNRR	xxxDxxpYxxxxxx
NP_055855.2	121583483	1772	Y	RGADSAyYQVGQT	xxxDxxpYxxxxxx
NP_001002881.1	50881950	1453	Y	RGADSAyYQVGQT	xxxDxxpYxxxxxx
NP_005537.3	15718680	512	Y	FVLDDQyTSSTGT	xxxDxxpYxxxxxx
NP_975010.1	42544182	566	Y	YVLDDQyVSSVGT	xxxDxxpYxxxxxx
NP_001712.1	4502435	566	Y	YVLDDQyVSSVGT	xxxDxxpYxxxxxx
NP_079050.2	40254967	367	Y	SKADDRySQSVIR	xxxDxxpYxxxxxx
NP_001070254.1	115647981	606	Y	SKADDRySQSVIR	xxxDxxpYxxxxxx
NP_005535.1	5031805	612	Y	LHTDDGyMPMSPG	xxxDxxpYxxxxxx
NP_065821.1	16262452	1184	Y	EEFDSVyDPSSIA	xxxDxxpYxxxxxx
NP_055382.2	44662836	653	Y	DSPDGQyENSEGG	xxxDxxpYxxxxxx
NP_003875.3	40805843	729	Y	RDPDQLySTLKSI	xxxDxxpYxxxxxx
NP_001224.1	4557413	19	Y	FMDDDSySHHSGL	xxxDxxpYxxxxxx
NP_937855.1	38176292	19	Y	FMDDDSySHHSGL	xxxDxxpYxxxxxx
NP_060923.2	117938268	106	Y	RYYDDIyFDSDSE	xxxDxxpYxxxxxx
NP_056060.2	140161500	454	Y	REEDEHyYELLLT	xxxDxxpYxxxxxx
NP_940892.1	50234889	15	Y	GDPDEQyDFLFKL	xxxDxxpYxxxxxx
NP_116219.2	186928847	188	Y	MIVDRQyMGVSKR	xxxDxxpYxxxxxx
NP_065390.1	10092619	42	Y	SMKDEEyEQMVKE	xxxDxxpYxxxxxx
NP_000052.1	4557377	551	Y	YVLDDEyTSSVGS	xxxDxxpYxxxxxx
NP_055317.1	7657381	329	Y	SSSDDQyWAFSDI	xxxDxxpYxxxxxx
NP_009114.1	6005830	195	Y	GGLDDRySLVSEQ	xxxDxxpYxxxxxx
NP_000959.2	16579885	264	Y	RKLDELyGTWRKA	xxxDxxpYxxxxxx
NP_015561.1	6466466	115	Y	DREDGNyCPPVKR	xxxDxxpYxxxxxx
NP_003615.2	194097487	115	Y	DREDGNyCPPVKR	xxxDxxpYxxxxxx
NP_015559.2	194097489	47	Y	DREDGNyCPPVKR	xxxDxxpYxxxxxx
NP_005598.3	27886593	947	Y	RSNDKVyENVTGL	xxxDxxpYxxxxxx
NP_722560.1	24476013	925	Y	RSNDKVyENVTGL	xxxDxxpYxxxxxx
NP_115758.3	186928841	268	Y	IPNDDPyFHITKT	xxxDxxpYxxxxxx
NP_057424.3	256600194	1501	Y	PKKDDRyREPPPT	xxxDxxpYxxxxxx
NP_061849.2	21361602	28	Y	SNSDFNySYPTKQ	xxxDxxpYxxxxxx
NP_006197.1	5453870	849	Y	IMHDSNyVSKGST	xxxDxxpYxxxxxx
NP_689637.3	124244056	471	Y	PNSDEGyYDSTTP	xxxDxxpYxxxxxx
NP_976225.1	42741684	124	Y	EESDGEyDEFGRK	xxxDxxpYxxxxxx
NP_005446.2	42741682	124	Y	EESDGEyDEFGRK	xxxDxxpYxxxxxx
NP_055238.1	7656879	712	Y	SEPDDRyPLIVKI	xxxDxxpYxxxxxx
NP_001973.2	54792100	1262	Y	PDEDYEyMNRQRD	xxxDxxpYxxxxxx
NP_056988.3	84043963	593	Y	MSSDSEyDSDDDR	xxxDxxpYxxxxxx
NP_003362.2	40549448	172	Y	DGGDDIyEDIIKV	xxxDxxpYxxxxxx
NP_000108.1	4557553	95	Y	GYNDDYyEESYFT	xxxDxxpYxxxxxx
NP_991403.1	45545424	551	Y	RSRDPHyDDFRSR	xxxDxxpYxxxxxx
NP_057009.3	45505163	532	Y	RSRDPHyDDFRSR	xxxDxxpYxxxxxx
NP_991404.1	45593136	483	Y	RSRDPHyDDFRSR	xxxDxxpYxxxxxx
NP_003904.3	89276756	848	Y	ADNDITyYLVSRF	xxxDxxpYxxxxxx
NP_789770.1	28872759	848	Y	ADNDITyYLVSRF	xxxDxxpYxxxxxx
NP_777568.1	28372509	145	Y	AYADSYyYEDGGM	xxxDxxpYxxxxxx
NP_001996.1	4503687	713	Y	EEADGVyAASGGL	xxxDxxpYxxxxxx
NP_002003.1	4503719	114	Y	HRNDSIyEELQKH	xxxDxxpYxxxxxx
NP_003841.1	11321583	84	Y	KSPDEAyAIAKKL	xxxDxxpYxxxxxx
NP_001078935.1	146231977	803	Y	KSLDNNySTPNER	xxxDxxpYxxxxxx
NP_001078936.1	146231994	797	Y	KSLDNNySTPNER	xxxDxxpYxxxxxx
NP_001078937.1	146231948	797	Y	KSLDNNySTPNER	xxxDxxpYxxxxxx
NP_001078938.1	146231975	797	Y	KSLDNNySTPNER	xxxDxxpYxxxxxx
NP_001078927.1	146231940	904	Y	KSLDNNySTPNER	xxxDxxpYxxxxxx
NP_001078928.1	146231962	898	Y	KSLDNNySTPNER	xxxDxxpYxxxxxx
NP_001078929.1	146231938	898	Y	KSLDNNySTPNER	xxxDxxpYxxxxxx
NP_001078930.1	146231968	898	Y	KSLDNNySTPNER	xxxDxxpYxxxxxx
NP_001078931.1	146231942	898	Y	KSLDNNySTPNER	xxxDxxpYxxxxxx
NP_001078932.1	146231970	803	Y	KSLDNNySTPNER	xxxDxxpYxxxxxx
NP_001078933.1	146231991	797	Y	KSLDNNySTPNER	xxxDxxpYxxxxxx
NP_005853.2	62243696	689	Y	ADDDDIyNVLSTL	xxxDxxpYxxxxxx
NP_004434.2	17975768	792	Y	DPSDPTyTSSLGG	xxxDxxpYxxxxxx
NP_612410.1	24308440	204	Y	RRNDSIyEASSLY	xxxDxxpYxxxxxx
NP_004439.2	54792096	876	Y	LDIDETyYHADGG	xxxDxxpYxxxxxx
NP_001005862.1	54792098	846	Y	LDIDETyYHADGG	xxxDxxpYxxxxxx
NP_848018.1	41281911	145	Y	AYADSYyYEDGDQ	xxxDxxpYxxxxxx
NP_000236.2	42741655	1234	Y	DMYDKEyYSVHNK	xxxDxxpYxxxxxx
NP_054864.3	42476068	29	Y	SSTDDGyIDLQFK	xxxDxxpYxxxxxx
NP_001009923.1	58331120	92	Y	SSTDDGyIDLQFK	xxxDxxpYxxxxxx
NP_001009924.1	58331122	29	Y	SSTDDGyIDLQFK	xxxDxxpYxxxxxx
NP_001009925.1	58331124	29	Y	SSTDDGyIDLQFK	xxxDxxpYxxxxxx
NP_001070.2	31455611	492	Y	LGADDSyYTARSA	xxxDxxpYxxxxxx
NP_997402.1	46488944	185	Y	LGADDSyYTARSA	xxxDxxpYxxxxxx
NP_002264.1	4504919	204	Y	KDVDEAyMNKVEL	xxxDxxpYxxxxxx
NP_004955.2	13128860	237	Y	GIDDESyEAIFKP	xxxDxxpYxxxxxx
NP_004881.2	118344454	103	Y	EDDDCRyVMIFKK	xxxDxxpYxxxxxx
NP_001555.1	4504695	56	Y	RELDNKyQETLKE	xxxDxxpYxxxxxx
NP_002030.2	46370073	447	Y	EELDENyVPMNPN	xxxDxxpYxxxxxx
NP_997006.1	46370071	447	Y	EELDENyVPMNPN	xxxDxxpYxxxxxx
NP_002600.1	4505683	857	Y	IMRDSNyISKGST	xxxDxxpYxxxxxx
NP_005018.1	4826908	464	Y	REYDQLyEEYTRT	xxxDxxpYxxxxxx
NP_852664.1	32455248	467	Y	REYDRLyEEYTRT	xxxDxxpYxxxxxx
NP_852556.2	32455252	197	Y	REYDRLyEEYTRT	xxxDxxpYxxxxxx
NP_852665.1	32455250	167	Y	REYDRLyEEYTRT	xxxDxxpYxxxxxx
NP_004435.3	32528301	774	Y	NSSDPTyTSSLGG	xxxDxxpYxxxxxx
NP_892113.4	194239662	349	Y	EPPDHQyYNDFPG	xxxDxxpYxxxxxx
NP_003020.2	32261324	239	Y	EPPDHQyYNDFPG	xxxDxxpYxxxxxx
NP_005900.2	153945728	1940	Y	EDGDYSyEIIEKT	xxxDxxpYxxxxxx
NP_114399.1	14165456	1814	Y	EDGDYSyEIIEKT	xxxDxxpYxxxxxx
NP_005223.4	221316650	781	Y	DDFDGTyETQGGK	xxxDxxpYxxxxxx
NP_067677.4	51871374	738	Y	KAEDVGyQSSSRS	xxxDxxpYxxxxxx
NP_004586.2	21264341	147	Y	YDEDSPyQNIKIL	xxxDxxpYxxxxxx
NP_004110.2	121114304	842	Y	IMSDSNyVVRGNA	xxxDxxpYxxxxxx
NP_003362.2	40549448	142	Y	ENDDDVyRSLEEL	xxxDxxpYxxxxxx
NP_055022.2	166197668	453	Y	SHVDNEySQPPRN	xxxDxxpYxxxxxx
NP_563615.3	54792129	749	Y	PAPDELyYQVPQS	xxxDxxpYxxxxxx
NP_067077.1	11037061	264	Y	ENDDDAyLNSPWA	xxxDxxpYxxxxxx
NP_112506.2	144953898	330	Y	PFIDNTySCSGKL	xxxDxxpYxxxxxx
NP_006453.1	5454168	288	Y	PFIDNTySCSGKL	xxxDxxpYxxxxxx
NP_937862.1	38201667	44	Y	REIDAKyQEILKE	xxxDxxpYxxxxxx
NP_002218.2	102469034	1034	Y	IETDKEyYTVKDD	xxxDxxpYxxxxxx
NP_004439.2	54792096	1004	Y	SPLDSTyYRSLLE	xxxDxxpYxxxxxx
NP_001005862.1	54792098	974	Y	SPLDSTyYRSLLE	xxxDxxpYxxxxxx
NP_057396.1	7706501	236	Y	RDEDMLySPELAQ	xxxDxxpYxxxxxx
NP_005219.2	29725609	1125	Y	PSRDPHyQDPHST	xxxDxxpYxxxxxx
NP_036419.3	187608516	750	Y	QPGDETyQDIFRD	xxxDxxpYxxxxxx
NP_004473.2	153266878	355	Y	RRKDETyPIKTPT	xxxDxxpYxxxxxx
NP_000723.1	4502669	160	Y	DRDDAQySHLGGN	xxxDxxpYxxxxxx
NP_001035741.1	98985801	116	Y	DRDDAQySHLGGN	xxxDxxpYxxxxxx
NP_001372.1	4503357	315	Y	PSQDSLySDPLDS	xxxDxxpYxxxxxx
NP_055848.1	38524622	522	Y	ESPDGSyTEEQSQ	xxxDxxpYxxxxxx
NP_005202.2	27262659	809	Y	IMNDSNyIVKGNA	xxxDxxpYxxxxxx
NP_006112.3	119395750	295	Y	KDVDGAyMTKVDL	xxxDxxpYxxxxxx
NP_055244.3	221625538	634	Y	TDSDVEyISETKI	xxxDxxpYxxxxxx
NP_055228.2	11125768	38	Y	EGPDPEyDESDVP	xxxDxxpYxxxxxx
NP_066564.2	153791535	734	Y	KDPDQLyTTLKNL	xxxDxxpYxxxxxx
NP_002600.1	4505683	934	Y	HASDEIyEIMQKC	xxxDxxpYxxxxxx
NP_008909.1	5902158	249	Y	VYEDENyEVGSDD	xxxDxxpYxxxxxx
NP_003917.1	4505119	35	Y	GHRDVFyYSPSGK	xxxDxxpYxxxxxx
NP_000064.1	4557429	160	Y	LPNDQLyQPLKDR	xxxDxxpYxxxxxx
NP_004097.1	4758344	65	Y	EKSDGVyTGLSTR	xxxDxxpYxxxxxx
NP_055265.1	7657577	188	Y	SFPDQAyANSQPA	xxxDxxpYxxxxxx
NP_005900.2	153945728	1921	Y	SPSDSGySYETIG	xxxDxxpYxxxxxx
NP_114399.1	14165456	1795	Y	SPSDSGySYETIG	xxxDxxpYxxxxxx
NP_002010.2	156104876	1213	Y	SSDDVRyVNAFKF	xxxDxxpYxxxxxx
NP_005547.3	67782365	205	Y	KDVDAAyMSKVEL	xxxDxxpYxxxxxx
NP_000723.1	4502669	149	Y	LRNDQVyQPLRDR	xxxDxxpYxxxxxx
NP_001035741.1	98985801	105	Y	LRNDQVyQPLRDR	xxxDxxpYxxxxxx
NP_004439.2	54792096	1221	Y	PAFDNLyYWDQDP	xxxDxxpYxxxxxx
NP_001005862.1	54792098	1191	Y	PAFDNLyYWDQDP	xxxDxxpYxxxxxx
Q8NFH8	34098575	558	Y	AKKDVLySQPPSK	xxxDxxpYxxxxxx
NP_004717.2	125625326	558	Y	AKKDVLySQPPSK	xxxDxxpYxxxxxx
NP_001074444.1	125625322	557	Y	AKKDVLySQPPSK	xxxDxxpYxxxxxx
NP_062565.2	21361831	1127	Y	HMMDALyAQVKKP	xxxDxxpYxxxxxx
NP_072174.3	66529407	903	Y	AASDGQyENQSPE	xxxDxxpYxxxxxx
NP_872634.1	33188449	330	Y	NDQDGEyCPEVKL	xxxDxxpYxxxxxx
NP_872633.1	33188447	319	Y	NDQDGEyCPEVKL	xxxDxxpYxxxxxx
NP_067051.2	226509740	238	Y	HPTDEAySPPPAP	xxxDxxpYxxxxxx
NP_005383.3	117190342	877	Y	KDSDYVyPSLESD	xxxDxxpYxxxxxx
NP_078793.1	24797091	877	Y	KDSDYVyPSLESD	xxxDxxpYxxxxxx
NP_659498.4	260763910	280	Y	EKSDAEyTNSPLV	xxxDxxpYxxxxxx
NP_002071.2	73486658	96	Y	KNLDKEyLPIGGL	xxxDxxpYxxxxxx
NP_005868.1	5032087	456	Y	QSDDEVyAPGLDI	xxxDxxpYxxxxxx
NP_001005409.1	53831995	391	Y	QSDDEVyAPGLDI	xxxDxxpYxxxxxx
NP_067674.2	50511936	287	Y	ETADGGyMTLNPR	xxxDxxpYxxxxxx
NP_004575.1	4759022	28	Y	RIGDELyLEPLED	xxxDxxpYxxxxxx
NP_861447.3	170932524	187	Y	SSSDAEyDKLPDA	xxxDxxpYxxxxxx
NP_002030.2	46370073	373	Y	SDTDSSyCIPTAG	xxxDxxpYxxxxxx
NP_997006.1	46370071	373	Y	SDTDSSyCIPTAG	xxxDxxpYxxxxxx
NP_001742.1	10835051	260	Y	KIVDNGyGYVSNG	xxxDxxpYxxxxxx
NP_644802.1	21269877	260	Y	KIVDNGyGYVSNG	xxxDxxpYxxxxxx
NP_001014437.1	62240992	343	Y	KIVDNGyGYVSNG	xxxDxxpYxxxxxx
NP_001014438.1	62240994	250	Y	KIVDNGyGYVSNG	xxxDxxpYxxxxxx
NP_001036194.1	112382241	412	Y	LIKDDEyNPCQGS	xxxDxxpYxxxxxx
NP_001036212.1	112382244	412	Y	LIKDDEyNPCQGS	xxxDxxpYxxxxxx
NP_003803.1	4501913	707	Y	DDTDVGyVEDGTP	xxxDxxpYxxxxxx
NP_932170.1	37595565	142	Y	KGHDGLyQGLSTA	xxxDxxpYxxxxxx
NP_000725.1	4557431	141	Y	KGHDGLyQGLSTA	xxxDxxpYxxxxxx
NP_004595.2	20149560	115	Y	EEADENyNSVNTR	xxxDxxpYxxxxxx
NP_004438.3	56682953	525	Y	RHIDRNyEPLKTQ	xxxDxxpYxxxxxx
NP_065089.2	55769585	329	Y	LDEDVSyKVPSSF	xxxDxxpYxxxxxx
NP_005419.2	7108367	174	Y	AEGDEIyEDLMRS	xxxDxxpYxxxxxx
NP_892009.3	161169013	1179	Y	QNQDDGyLALSSR	xxxDxxpYxxxxxx
NP_660093.2	38044282	1179	Y	QNQDDGyLALSSR	xxxDxxpYxxxxxx
NP_060627.2	95113666	467	Y	GRGDNWySEDEDT	xxxDxxpYxxxxxx
NP_060276.2	157388906	200	Y	AQVDVLySRVCKP	xxxDxxpYxxxxxx
NP_005498.1	5031635	68	Y	QTVDDPyATFVKM	xxxDxxpYxxxxxx
NP_004406.2	58530840	28	Y	SGPDLRyEVTSGG	xxxDxxpYxxxxxx
NP_001008844.1	58530842	28	Y	SGPDLRyEVTSGG	xxxDxxpYxxxxxx
NP_006370.1	5454048	67	Y	EDQDRIyVGSKDH	xxxDxxpYxxxxxx
NP_002625.1	4505773	249	Y	AAEDIAyQLSRSR	xxxDxxpYxxxxxx
NP_003613.2	29294627	336	Y	KGKDGEyEELLNS	xxxDxxpYxxxxxx
NP_060218.1	8923271	74	Y	EKLDWMyQGPGGM	xxxDxxpYxxxxxx
NP_006494.1	5729991	164	Y	QKPDVMyADIGGM	xxxDxxpYxxxxxx
NP_694546.1	24430155	133	Y	QKPDVMyADIGGM	xxxDxxpYxxxxxx
NP_003740.2	38683860	742	Y	SPEDSGyMRMWCG	xxxDxxpYxxxxxx
NP_071496.1	11559923	12	Y	TYDDRAySSFGGG	xxxDxxpYxxxxxx
NP_114381.1	14702180	12	Y	TYDDRAySSFGGG	xxxDxxpYxxxxxx
NP_000468.1	4502027	521	Y	LEVDETyVPKEFN	xxxDxxpYxxxxxx
NP_002028.1	4503823	420	Y	LIEDNEyTARQGA	xxxDxxpYxxxxxx
NP_694592.1	23510362	417	Y	LIEDNEyTARQGA	xxxDxxpYxxxxxx
NP_694593.1	23510364	365	Y	LIEDNEyTARQGA	xxxDxxpYxxxxxx
NP_005424.1	4885661	426	Y	LIEDNEyTARQGA	xxxDxxpYxxxxxx
NP_938033.1	38202217	419	Y	LIEDNEyTARQGA	xxxDxxpYxxxxxx
NP_000652.2	15431303	180	Y	KFLDGIyVSEKGT	xxxDxxpYxxxxxx
NP_001020092.1	67944630	180	Y	KFLDGIyVSEKGT	xxxDxxpYxxxxxx
NP_001456.3	42476118	697	Y	DMGDEVyDDVDTS	xxxDxxpYxxxxxx
NP_955367.1	40788007	651	Y	DMGDEVyDDVDTS	xxxDxxpYxxxxxx
NP_005073.2	68160937	278	Y	SKFDTIyQILLKK	xxxDxxpYxxxxxx
NP_001979.2	156104874	360	Y	SNLDAKySPAPGG	xxxDxxpYxxxxxx
NP_001973.2	54792100	1327	Y	SAFDNPyYWHSRL	xxxDxxpYxxxxxx
NP_005347.3	112789546	394	Y	LIEDNEyTAREGA	xxxDxxpYxxxxxx
NP_001036236.1	112789548	394	Y	LIEDNEyTAREGA	xxxDxxpYxxxxxx
NP_060018.1	8923710	244	Y	LQLDNQyAVLENQ	xxxDxxpYxxxxxx
NP_001646.2	11863154	310	Y	RISDDKyGRIRLH	xxxDxxpYxxxxxx
NP_006436.3	91208426	254	Y	DLVDDNyFYLFDL	xxxDxxpYxxxxxx
NP_473357.1	16905517	138	Y	RSFDYNyRRSYSP	xxxDxxpYxxxxxx
NP_006616.1	5730079	138	Y	RSFDYNyRRSYSP	xxxDxxpYxxxxxx
NP_055828.2	58761546	136	Y	LSEDEYySEEERN	xxxDxxpYxxxxxx
NP_001009999.1	58761544	136	Y	LSEDEYySEEERN	xxxDxxpYxxxxxx
NP_076416.2	226443007	207	Y	LSRDSTyKLLKSV	xxxDxxpYxxxxxx
NP_002904.3	32528306	1094	Y	PSLDSEyNEELNE	xxxDxxpYxxxxxx
NP_006197.1	5453870	1018	Y	LSADSGyIIPLPD	xxxDxxpYxxxxxx
NP_062565.2	21361831	388	Y	FSPDSQyIDNRSV	xxxDxxpYxxxxxx
NP_001087.2	38569421	682	Y	RTTDGVyEGVAIG	xxxDxxpYxxxxxx
NP_942127.1	38569423	672	Y	RTTDGVyEGVAIG	xxxDxxpYxxxxxx
NP_002341.1	4505055	501	Y	SVLDDFyTATEGQ	xxxDxxpYxxxxxx
NP_000617.1	11038674	196	Y	MEEDHTyEGLDID	xxxDxxpYxxxxxx
NP_067613.1	11038676	92	Y	MEEDHTyEGLDID	xxxDxxpYxxxxxx
NP_061918.3	45238858	800	Y	FSHDFTyLVSGSE	xxxDxxpYxxxxxx
NP_963888.1	42491354	56	Y	AAEDGAyTVRPSS	xxxDxxpYxxxxxx
NP_060910.3	63054864	181	Y	MVEDCLyETVKEI	xxxDxxpYxxxxxx
NP_001895.1	4503131	86	Y	ADIDGQyAMTRAQ	xxxDxxpYxxxxxx
AAK69431.1	14582259	1164	Y	SVSDFNySRTSPS	xxxDxxpYxxxxxx
NP_061165.1	8923909	1164	Y	SVSDFNySRTSPS	xxxDxxpYxxxxxx
NP_001006600.1	55770895	1164	Y	SVSDFNySRTSPS	xxxDxxpYxxxxxx
NP_001834.2	28373117	972	Y	IPRDGEyVVEVRA	xxxDxxpYxxxxxx
NP_778203.1	28373119	961	Y	IPRDGEyVVEVRA	xxxDxxpYxxxxxx
NP_064504.2	27477136	637	Y	SNVDSSyLESLYQ	xxxDxxpYxxxxxx
NP_078901.3	27477138	637	Y	SNVDSSyLESLYQ	xxxDxxpYxxxxxx
NP_059145.2	111118978	780	Y	DTSDPTyTSALGG	xxxDxxpYxxxxxx
NP_004433.2	21396504	781	Y	DTSDPTyTSALGG	xxxDxxpYxxxxxx
NP_002131.2	14165439	234	Y	NFYDETyDYGGFT	xxxDxxpYxxxxxx
NP_112552.1	14165435	234	Y	NFYDETyDYGGFT	xxxDxxpYxxxxxx
NP_112553.1	14165437	234	Y	NFYDETyDYGGFT	xxxDxxpYxxxxxx
NP_006274.2	170763517	533	Y	PEEDLEyFECSNV	xxxDxxpYxxxxxx
NP_000108.1	4557553	161	Y	YGRDSAyQSITHY	xxxDxxpYxxxxxx
NP_055382.2	44662836	115	Y	PQPDSVyLVPTPS	xxxDxxpYxxxxxx
NP_005175.2	58218968	99	Y	FDKDGNyYISAAE	xxxDxxpYxxxxxx
NP_004577.1	4759050	356	Y	RPEDTFyFDPEFT	xxxDxxpYxxxxxx
NP_065101.1	9966799	43	Y	SPGDTSyYQDQVD	xxxDxxpYxxxxxx
NP_919259.3	68077168	315	Y	ELYDDLyCPACDK	xxxDxxpYxxxxxx
NP_001012339.2	68077166	315	Y	ELYDDLyCPACDK	xxxDxxpYxxxxxx
NP_005772.3	56549666	284	Y	PQNDDHyVMQEHR	xxxDxxpYxxxxxx
NP_001010938.1	58331191	347	Y	PQNDDHyVMQEHR	xxxDxxpYxxxxxx
NP_004963.1	4826776	1007	Y	LPQDKEyYKVKEP	xxxDxxpYxxxxxx
NP_004443.3	238550159	356	Y	ANSDSMyIEDLEA	xxxDxxpYxxxxxx
NP_008816.3	118498345	2209	Y	RNKDSPyNFSNPP	xxxDxxpYxxxxxx
BAD18671.1	47077575	641	Y	FQVDITyTEGGEA	xxxDxxpYxxxxxx
NP_003948.2	116089335	595	Y	FQVDITyTEGGEA	xxxDxxpYxxxxxx
NP_068713.2	21536466	779	Y	DCLDGLyALMSRC	xxxDxxpYxxxxxx
NP_665696.1	21955172	162	Y	KSHDNVySLGGLE	xxxDxxpYxxxxxx
NP_002411.3	94538366	774	Y	TYDDFSyQTSKEN	xxxDxxpYxxxxxx
NP_000441.2	187960042	603	Y	LESDGSyQKPSYI	xxxDxxpYxxxxxx
NP_940861.3	121949817	185	Y	RVLDSSyGITKSL	xxxDxxpYxxxxxx
AAF23374.1	6683817	278	Y	APVDFGyVGIDSI	xxxDxxpYxxxxxx
NP_006631.2	116256489	260	Y	APVDFGyVGIDSI	xxxDxxpYxxxxxx
NP_002101.2	30795229	411	Y	VIEDNEyTAREGA	xxxDxxpYxxxxxx
NP_002341.1	4505055	397	Y	VIEDNEyTAREGA	xxxDxxpYxxxxxx
NP_004184.1	4758416	1316	Y	VSLDRGyTSDSEV	xxxDxxpYxxxxxx
NP_038470.1	7305503	124	Y	GVEDPEyAVTQLA	xxxDxxpYxxxxxx
NP_001118.3	260436862	897	Y	EGQDMLyQSLKLT	xxxDxxpYxxxxxx
NP_663782.2	260436860	890	Y	EGQDMLyQSLKLT	xxxDxxpYxxxxxx
NP_002813.2	40068475	343	Y	LTADFLyEEVHPK	xxxDxxpYxxxxxx
NP_945325.1	40068477	211	Y	LTADFLyEEVHPK	xxxDxxpYxxxxxx
NP_002871.1	4506401	340	Y	GQRDSSyYWEIEA	xxxDxxpYxxxxxx
NP_066124.1	10862703	1096	Y	YPNDSVyANWMLS	xxxDxxpYxxxxxx
NP_003142.1	4507255	693	Y	ERGDKGyVPSVFI	xxxDxxpYxxxxxx
NP_055531.1	7661880	712	Y	QAGDETyLDIFRD	xxxDxxpYxxxxxx
NP_000106.1	4557547	430	Y	KANDHGyDNFRSS	xxxDxxpYxxxxxx
NP_001070.2	31455611	493	Y	GADDSYyTARSAG	xxxDxxpYxxxxxx
NP_997402.1	46488944	186	Y	GADDSYyTARSAG	xxxDxxpYxxxxxx
NP_009035.3	15431288	11	Y	VSRDTLyEAVREV	xxxDxxpYxxxxxx
NP_066943.2	119943106	672	Y	NEVDGQyYHFVVS	xxxDxxpYxxxxxx
NP_065781.1	119943108	367	Y	NEVDGQyYHFVVS	xxxDxxpYxxxxxx
NP_005569.1	5031887	317	Y	NDSDPTyGQQGHP	xxxDxxpYxxxxxx
NP_065974.1	151301098	531	Y	GLVDKNyGSSSSE	xxxDxxpYxxxxxx
NP_006197.1	5453870	988	Y	VDSDNAyIGVTYK	xxxDxxpYxxxxxx
NP_037506.2	22027538	319	Y	KDNDFIyHDRVPD	xxxDxxpYxxxxxx
NP_115646.2	19923729	692	Y	RYLDLSyNDIRFI	xxxDxxpYxxxxxx
NP_036580.2	21618344	679	Y	RPKDEVySKYYTP	xxxDxxpYxxxxxx
NP_892113.4	194239662	427	Y	LFDDPSyVNVQNL	xxxDxxpYxxxxxx
NP_003020.2	32261324	318	Y	LFDDPSyVNVQNL	xxxDxxpYxxxxxx
NP_653252.3	126517478	882	Y	ATVDSVyAREQIN	xxxDxxpYxxxxxx
NP_060418.4	46048234	376	Y	MRNDREyDSGDTD	xxxDxxpYxxxxxx
NP_000290.2	53729346	214	Y	SKQDPVyIPPISC	xxxDxxpYxxxxxx
NP_001005337.1	53729344	214	Y	SKQDPVyIPPISC	xxxDxxpYxxxxxx
NP_689969.2	59891448	262	Y	PYTDFHyRHSPDT	xxxDxxpYxxxxxx
NP_002022.1	4503787	497	Y	FETDSSySDANNF	xxxDxxpYxxxxxx
NP_006284.2	27597078	828	Y	PGRDQPySGAGDG	xxxDxxpYxxxxxx
NP_004630.3	149158692	1116	Y	LQEDPNySPQRFP	xxxDxxpYxxxxxx
NP_542433.1	18375630	1110	Y	LQEDPNySPQRFP	xxxDxxpYxxxxxx
NP_542434.1	18375632	1110	Y	LQEDPNySPQRFP	xxxDxxpYxxxxxx
NP_001092004.1	149158696	1110	Y	LQEDPNySPQRFP	xxxDxxpYxxxxxx
NP_059145.2	111118978	601	Y	IYIDPFyYEDPNE	xxxDxxpYxxxxxx
NP_004433.2	21396504	602	Y	IYIDPFyYEDPNE	xxxDxxpYxxxxxx
NP_006485.2	156104872	16	Y	AFPDWAyKPESSP	xxxDxxpYxxxxxx
NP_004646.3	195927059	271	Y	ETVDSGyRSFKRS	xxxDxxpYxxxxxx
NP_006314.2	112382212	1100	Y	RLDDRVyAMCQIK	xxxDxxpYxxxxxx
NP_001036199.1	112382214	1065	Y	RLDDRVyAMCQIK	xxxDxxpYxxxxxx
NP_003464.1	4507249	381	Y	MNEDPMySMYAKL	xxxDxxpYxxxxxx
NP_002600.1	4505683	763	Y	MKGDVKyADIESS	xxxDxxpYxxxxxx
NP_002341.1	4505055	473	Y	NCPDELyDIMKMC	xxxDxxpYxxxxxx
NP_079012.3	83320070	158	Y	SRGDNVyVVTEVL	xxxDxxpYxxxxxx
NP_775873.2	55749758	98	Y	GARDERyRSDIHT	xxxDxxpYxxxxxx
NP_055765.2	182509178	516	Y	DFRDNHyQINSIQ	xxxDxxpYxxxxxx
NP_005772.3	56549666	827	Y	FASDPKyATPQVI	xxxDxxpYxxxxxx
NP_001010938.1	58331191	905	Y	FASDPKyATPQVI	xxxDxxpYxxxxxx
NP_005817.1	5031755	436	Y	AYEDYYyHPPPRM	xxxDxxpYxxxxxx
NP_054749.2	41393573	545	Y	LEDDAIySVHVPA	xxxDxxpYxxxxxx
NP_001078923.1	146231998	554	Y	LEDDAIySVHVPA	xxxDxxpYxxxxxx
NP_640337.3	189217897	234	Y	KKADYRyTYDEAI	xxxDxxpYxxxxxx
NP_005383.3	117190342	904	Y	GSDDAPySPTARV	xxxDxxpYxxxxxx
NP_078793.1	24797091	904	Y	GSDDAPySPTARV	xxxDxxpYxxxxxx
NP_690866.1	23097250	209	Y	HEADKTyMLREYT	xxxDxxpYxxxxxx
NP_055690.1	7661878	196	Y	MMADKKyKETFSA	xxxDxxpYxxxxxx
NP_001448.2	105990514	903	Y	DIIDNYyYSHTVK	xxxDxxpYxxxxxx
NP_003119.2	112382250	1137	Y	GQTDAQyMFLRQR	xxxDxxpYxxxxxx
NP_842565.2	112382252	1124	Y	GQTDAQyMFLRQR	xxxDxxpYxxxxxx
NP_001448.2	105990514	1020	Y	YAVDVTyDGHPVP	xxxDxxpYxxxxxx
NP_003970.1	4506403	317	Y	ETGDTLyAPYSTH	xxxDxxpYxxxxxx
NP_001447.2	116063573	1604	Y	DNHDGTyTVAYVP	xxxDxxpYxxxxxx
NP_064520.2	18426902	534	Y	GGEDPLyVARRLV	xxxDxxpYxxxxxx
NP_569079.1	18426904	509	Y	GGEDPLyVARRLV	xxxDxxpYxxxxxx
NP_001422.1	4503579	623	Y	VEGDNIyVRHSNL	xxxDxxpYxxxxxx
NP_065965.4	262231746	3207	Y	EEKDVVyKHFPIP	xxxDxxpYxxxxxx
NP_005104.2	30260188	54	Y	QNTDLIyQTGPKS	xxxDxxpYxxxxxx
NP_079021.3	190358504	48	Y	SCSDCSyRDKPGS	xxxDxxpYxxxxxx
NP_004394.1	4758154	254	Y	KRIDSVyLDPLVF	xxxDxxpYxxxxxx
NP_004094.3	27886584	881	Y	RTDDLVyLNVMEL	xxxDxxpYxxxxxx
NP_775267.1	27886588	839	Y	RTDDLVyLNVMEL	xxxDxxpYxxxxxx
NP_775266.1	27886586	881	Y	RTDDLVyLNVMEL	xxxDxxpYxxxxxx
NP_775268.1	27886590	881	Y	RTDDLVyLNVMEL	xxxDxxpYxxxxxx
NP_005498.1	5031635	89	Y	ALYDATyETKESK	xxxDxxpYxxxxxx
NP_068733.1	14719392	89	Y	ALYDATyETKESK	xxxDxxpYxxxxxx
NP_619579.1	33946278	89	Y	ALYDATyETKESK	xxxDxxpYxxxxxx
NP_054706.1	7669550	822	Y	SFLDSGyRILGAV	xxxDxxpYxxxxxx
NP_003364.1	4507877	822	Y	SFLDSGyRILGAV	xxxDxxpYxxxxxx
NP_006808.1	5803013	64	Y	VKFDTQyPYGEKQ	xxxDxxpYxxxxxx
NP_057404.2	21264365	831	Y	RLADINyEGRLEA	xxxDxxpYxxxxxx
NP_005378.4	56549643	848	Y	RLADINyEGRLEA	xxxDxxpYxxxxxx
NP_624357.1	21264369	831	Y	RLADINyEGRLEA	xxxDxxpYxxxxxx
NP_624358.2	56549645	831	Y	RLADINyEGRLEA	xxxDxxpYxxxxxx
NP_079422.1	13376735	110	Y	GTFDNIyLHVQIS	xxxDxxpYxxxxxx
Q92900	17380291	1112	Y	LSQDSTyQGERAY	xxxDxxpYxxxxxx
NP_002902.2	18375673	1101	Y	LSQDSTyQGERAY	xxxDxxpYxxxxxx
NP_005745.1	5031703	56	Y	KPADAVyGQKEIH	xxxDxxpYxxxxxx
NP_938405.1	38327552	56	Y	KPADAVyGQKEIH	xxxDxxpYxxxxxx
NP_056025.1	47271354	1108	Y	SPDDLKyIEEFNK	xxxDxxpYxxxxxx
NP_115551.2	50980309	84	Y	RFKDTAyCATFRQ	xxxDxxpYxxxxxx
AAQ89283.1	37182966	80	Y	FSVDKLyDLLFTN	xxxDxxpYxxxxxx
NP_065767.1	144227752	389	Y	FSVDKLyDLLFTN	xxxDxxpYxxxxxx
NP_071938.1	11968051	49	Y	IEDDGSyFQINQD	xxxDxxpYxxxxxx
NP_003119.2	112382250	1303	Y	TAQDMSyDEARNL	xxxDxxpYxxxxxx
NP_842565.2	112382252	1290	Y	TAQDMSyDEARNL	xxxDxxpYxxxxxx
NP_001001998.1	50301240	491	Y	IFTDESyLELYRK	xxxDxxpYxxxxxx
NP_002676.1	4505917	491	Y	IFTDESyLELYRK	xxxDxxpYxxxxxx
NP_000734.2	19923122	233	Y	IYPDITySLYIRR	xxxDxxpYxxxxxx
NP_060295.1	8923417	116	Y	KDPDRGyGAGVVT	xxxDxxpYxxxxxx
NP_005080.1	4827046	389	Y	PSPDHSyKRNGES	xxxDxxpYxxxxxx
NP_000112.1	4503591	485	Y	GLSDGPySNPYEN	xxxDxxpYxxxxxx
NP_003921.2	16753212	325	Y	KRGDVIyILSKEY	xxxDxxpYxxxxxx
NP_001448.2	105990514	2032	Y	DTRDAGyGGISLA	xxxDxxpYxxxxxx
NP_004291.1	4757714	133	Y	IIEDPYyGNDSDF	xxxDxxpYxxxxxx
NP_009030.1	6005988	133	Y	IIEDPYyGNDSDF	xxxDxxpYxxxxxx
NP_061943.2	31542656	223	Y	EQLDQRyLLVPEK	xxxDxxpYxxxxxx
NP_054828.2	24497618	1086	Y	ALRDTAyAIIKEE	xxxDxxpYxxxxxx
NP_065939.2	112734870	300	Y	RHIDRVyRDDTFV	xxxDxxpYxxxxxx
NP_000678.1	9951915	193	Y	SKFDNLyGCRESL	xxxDxxpYxxxxxx
NP_055908.1	14149669	532	Y	GSDDAAyTQALLV	xxxDxxpYxxxxxx
NP_055811.1	57863298	52	Y	ILIDSIyKVTEGR	xxxDxxpYxxxxxx
NP_002618.1	11321601	651	Y	YTTDFIyQLYSEE	xxxDxxpYxxxxxx
NP_055603.2	15208663	371	Y	KRYDLEyWAFHDG	xxxDxxpYxxxxxx
NP_150088.1	15208665	371	Y	KRYDLEyWAFHDG	xxxDxxpYxxxxxx
NP_150089.1	15208667	371	Y	KRYDLEyWAFHDG	xxxDxxpYxxxxxx
NP_443099.1	24119274	497	Y	ALEDFVyKIFGPG	xxxDxxpYxxxxxx
NP_005900.2	153945728	1870	Y	TPGDFSyAYQKPE	xxxDxxpYxxxxxx
NP_114399.1	14165456	1744	Y	TPGDFSyAYQKPE	xxxDxxpYxxxxxx
NP_003469.2	40254446	373	Y	TARDKAyKAVVND	xxxDxxpYxxxxxx
NP_005553.2	157419138	250	Y	QRLDPVyFVAPAK	xxxDxxpYxxxxxx
NP_061486.2	157419140	250	Y	QRLDPVyFVAPAK	xxxDxxpYxxxxxx
NP_056372.1	24308089	610	Y	KKGDVHyLIKWKD	xxxDxxpYxxxxxx
NP_005179.2	52426745	552	Y	PPPDRPySVGAES	xxxDxxpYxxxxxx
AAH33689.1	21707225	23	Y	VPSDLPyQDTTIR	xxxDxxpYxxxxxx
NP_653325.1	21687270	23	Y	VPSDLPyQDTTIR	xxxDxxpYxxxxxx
NP_001033692.1	84370252	23	Y	VPSDLPyQDTTIR	xxxDxxpYxxxxxx
NP_055988.2	50658061	113	Y	NSHDPSyFACLIK	xxxDxxpYxxxxxx
NP_006132.1	5453634	284	Y	KNLDLLyKYIVHK	xxxDxxpYxxxxxx
NP_005511.1	5031753	266	Y	FGRDLNyCFSGMS	xxxDxxpYxxxxxx
NP_002176.2	28610151	169	Y	LMHDVAyRQEKDE	xxxDxxpYxxxxxx
NP_003892.2	31982936	112	Y	LKVDKEyVKALPS	xxxDxxpYxxxxxx
NP_001250.1	4502741	13	Y	CRADQQyECVAEI	xxxDxxpYxxxxxx
NP_036270.1	7657013	305	Y	QYPDTRyLVDGTK	xxxDxxpYxxxxxx
NP_002037.2	7669492	42	Y	PFIDLNyMVYMFQ	xxxDxxpYxxxxxx
NP_036252.1	11321634	541	Y	LKKDTCySPKPSV	xxxDxxpYxxxxxx
NP_001017995.1	63055059	855	Y	GLKDSLyVAVADF	xxxDxxpYxxxxxx
NP_001155855.1	253735775	894	Y	PAGDALyLSFNPP	xxxDxxpYxxxxxx
NP_004714.2	15011974	866	Y	PAGDALyLSFNPP	xxxDxxpYxxxxxx
NP_001034806.1	89363030	10	Y	SKLDILyRRLLLT	xxxDxxpYxxxxxx
NP_004966.1	4826784	128	Y	WGIDEIyLESCCQ	xxxDxxpYxxxxxx
NP_003310.3	110349715	25663	Y	TRKDFRySTYHIP	xxxDxxpYxxxxxx
NP_596869.3	110349719	32160	Y	TRKDFRySTYHIP	xxxDxxpYxxxxxx
NP_597676.2	110349713	25788	Y	TRKDFRySTYHIP	xxxDxxpYxxxxxx
NP_597681.2	110349717	25855	Y	TRKDFRySTYHIP	xxxDxxpYxxxxxx
NP_064587.1	9910460	145	Y	STFDTPyCRVGLG	xxxDxxpYxxxxxx
NP_003572.2	52630423	110	Y	SGADRIyDLNIPA	xxxDxxpYxxxxxx
NP_001004720.1	52630425	110	Y	SGADRIyDLNIPA	xxxDxxpYxxxxxx
NP_003012.1	4506921	158	Y	ICIDPAySKAYGR	xxxDxxpYxxxxxx
NP_001778.1	10835055	513	Y	SNMDKIyIVMNYV	xxxDxxpYxxxxxx
NP_277021.1	16332358	500	Y	SNMDKIyIVMNYV	xxxDxxpYxxxxxx
NP_277027.1	16332370	498	Y	SNMDKIyIVMNYV	xxxDxxpYxxxxxx
NP_277028.1	16332372	489	Y	SNMDKIyIVMNYV	xxxDxxpYxxxxxx
NP_277024.1	16332364	466	Y	SNMDKIyIVMNYV	xxxDxxpYxxxxxx
NP_277023.1	16332362	455	Y	SNMDKIyIVMNYV	xxxDxxpYxxxxxx
NP_277025.1	16332366	283	Y	SNMDKIyIVMNYV	xxxDxxpYxxxxxx
NP_277022.1	16332360	244	Y	SNMDKIyIVMNYV	xxxDxxpYxxxxxx
NP_057538.1	7705997	43	Y	GQGDSLyPVGYLD	xxxDxxpYxxxxxx
NP_057136.2	126362983	57	Y	SEKDHFySDDDAI	xxxDxxpYxxxxxx
NP_001804.2	71061468	612	Y	IKMDLSySLESIE	xxxDxxpYxxxxxx
NP_005641.1	31652244	548	Y	TSSDTTyKGGASE	xxxDxxpYxxxxxx
NP_852469.1	31652242	548	Y	TSSDTTyKGGASE	xxxDxxpYxxxxxx
NP_006457.2	33598952	114	Y	WSRDIRyKSNLPL	xxxDxxpYxxxxxx
NP_150648.2	66346674	1630	Y	QPCDLFyQTTQKG	xxxDxxpYxxxxxx
NP_056001.1	15619008	1630	Y	QPCDLFyQTTQKG	xxxDxxpYxxxxxx
NP_001018047.1	66346672	1591	Y	QPCDLFyQTTQKG	xxxDxxpYxxxxxx
NP_001018048.1	66346676	1630	Y	QPCDLFyQTTQKG	xxxDxxpYxxxxxx
NP_000470.2	157266298	195	Y	PSRDTRyLVLAVD	xxxDxxpYxxxxxx
NP_991403.1	45545424	586	Y	RSGDLPyDGRLLE	xxxDxxpYxxxxxx
NP_057009.3	45505163	567	Y	RSGDLPyDGRLLE	xxxDxxpYxxxxxx
NP_991404.1	45593136	518	Y	RSGDLPyDGRLLE	xxxDxxpYxxxxxx
NP_036339.1	14141157	147	Y	DGYDGGyGGFDDY	xxxDxxpYxxxxxx
NP_005712.1	5031573	202	Y	AGRDITyFIQQLL	xxxDxxpYxxxxxx
NP_006257.1	24307909	586	Y	AMKDYLyGRLINF	xxxDxxpYxxxxxx
NP_001035827.1	108796058	531	Y	AMKDYLyGRLINF	xxxDxxpYxxxxxx
NP_001001936.1	50897850	413	Y	PSPDHLySFRILH	xxxDxxpYxxxxxx
NP_115939.1	24308338	413	Y	PSPDHLySFRILH	xxxDxxpYxxxxxx
NP_004534.2	115527120	5266	Y	NASDLRyKETFQK	xxxDxxpYxxxxxx
NP_067071.1	16753221	314	Y	ENTDMTyHLKDES	xxxDxxpYxxxxxx
NP_000389.1	4503327	43	Y	ESPDIKyPLRLID	xxxDxxpYxxxxxx
NP_015565.1	6552328	20	Y	ESPDIKyPLRLID	xxxDxxpYxxxxxx
NP_003890.1	4505573	595	Y	SLVDTVyALKDEV	xxxDxxpYxxxxxx
NP_001912.2	61742819	79	Y	NKLDTKyPYVCHA	xxxDxxpYxxxxxx
NP_001012750.1	61742821	90	Y	NKLDTKyPYVCHA	xxxDxxpYxxxxxx
NP_071756.2	21359947	244	Y	DIADKLyALNDRV	xxxDxxpYxxxxxx
NP_722550.1	24431933	191	Y	VVVDLLyWRDIKK	xxxDxxpYxxxxxx
NP_055202.1	7657293	45	Y	TSSDSLyPRGIQF	xxxDxxpYxxxxxx
NP_001014987.1	62739155	45	Y	TSSDSLyPRGIQF	xxxDxxpYxxxxxx
NP_001014988.1	62739157	45	Y	TSSDSLyPRGIQF	xxxDxxpYxxxxxx
NP_001014989.2	239049118	81	Y	TSSDSLyPRGIQF	xxxDxxpYxxxxxx
NP_003529.1	4504301	89	Y	TAMDVVyALKRQG	xxxDxxpYxxxxxx
NP_001934.2	116534898	1013	Y	HLQDVPyVMVRER	xxxDxxpYxxxxxx
NP_001203.1	4502491	188	Y	LVLDCHyPEDEVG	xxxDxxpYxxxxxx
NP_057211.4	42476193	105	Y	TDLDIAyKFGKTV	xxxDxxpYxxxxxx
NP_002957.1	4506761	25	Y	FAGDKGyLTKEDL	xxxDxxpYxxxxxx
NP_036442.3	116686122	1046	Y	DIEDLKyCSEHSV	xxxDxxpYxxxxxx
AAD41086.1	5231133	607	Y	NTEDKLyNLLLLR	xxxDxxpYxxxxxx
NP_006304.1	14149627	578	Y	NTEDKLyNLLLLR	xxxDxxpYxxxxxx
NP_000734.2	19923122	221	Y	YKHDIKyNCCEEI	xxxDxxpYxxxxxx
NP_996826.2	261337165	1688	Y	INTDGSyKCLCLP	xxxDxxpYxxxxxx
NP_000618.3	261337167	1362	Y	INTDGSyKCLCLP	xxxDxxpYxxxxxx
NP_071756.2	21359947	251	Y	ALNDRVyIGKRYH	xxxDxxpYxxxxxx
NP_004374.1	4758078	184	Y	AAQDEFyRSGWAL	xxxDxxpYxxxxxx
NP_002019.1	10835059	300	Y	KLVDGCySFWQAG	xxxDxxpYxxxxxx
NP_000013.2	47078295	348	Y	ELLDLLyKAYGMP	xxxDxxpYxxxxxx
NP_001009.1	4506687	30	Y	QLLDMSyEQLMQL	xxxDxxpYxxxxxx
NP_115631.1	14149979	605	Y	LLADYRyTGSDVW	xxxDxxpYxxxxxx
NP_065919.2	52426756	138	Y	VSPDLKyVLLAYD	xxxDxxpYxxxxxx
NP_001004360.2	85787627	131	Y	VSPDLKyVLLAYD	xxxDxxpYxxxxxx
NP_036462.2	100816397	878	Y	FLIDFSyLLSRRE	xxxDxxpYxxxxxx
NP_002282.2	167614504	950	Y	CVCDPGyIGSRCD	xxxDxxpYxxxxxx
NP_002631.3	38504673	179	Y	EQFDRKyTRGMLF	xxxDxxpYxxxxxx
NP_942130.1	38504669	179	Y	EQFDRKyTRGMLF	xxxDxxpYxxxxxx
NP_001027018.1	73623033	179	Y	EQFDRKyTRGMLF	xxxDxxpYxxxxxx
NP_001516.2	222080095	41	Y	LWRDYLyPKQYEW	xxxDxxpYxxxxxx
NP_067063.1	11056048	456	Y	IYTEDDyDERSDS	xxxEDxpYxxxxxx
NP_005556.1	5031855	113	Y	SFEEDDyESPNDD	xxxEDxpYxxxxxx
NP_005419.2	7108367	160	Y	EEDEDLyDCVENE	xxxEDxpYxxxxxx
NP_055315.2	21361437	634	Y	EEEEDTyEKVFDD	xxxEDxpYxxxxxx
NP_065816.2	82659109	370	Y	SSKEDDyESDAAT	xxxEDxpYxxxxxx
NP_852664.1	32455248	607	Y	ENTEDQySLVEDD	xxxEDxpYxxxxxx
NP_852556.2	32455252	337	Y	ENTEDQySLVEDD	xxxEDxpYxxxxxx
NP_852665.1	32455250	307	Y	ENTEDQySLVEDD	xxxEDxpYxxxxxx
NP_060628.2	155722990	464	Y	WEDEDFyDSDDDT	xxxEDxpYxxxxxx
NP_060844.2	40254893	18	Y	SSKEDAyDGVTSE	xxxEDxpYxxxxxx
NP_005598.3	27886593	429	Y	IDEEDTyTMPSTR	xxxEDxpYxxxxxx
NP_722560.1	24476013	407	Y	IDEEDTyTMPSTR	xxxEDxpYxxxxxx
NP_005179.2	52426745	699	Y	EGEEDTyYMTPSS	xxxEDxpYxxxxxx
NP_006288.2	190684675	515	Y	ENGEDPyAGSTDE	xxxEDxpYxxxxxx
NP_003362.2	40549448	159	Y	DLGEDIyDCVPCE	xxxEDxpYxxxxxx
NP_055243.1	10092691	944	Y	SSDEDGyDWGPAT	xxxEDxpYxxxxxx
NP_005769.1	5032031	76	Y	DRSEDGyHSDGDY	xxxEDxpYxxxxxx
NP_055828.2	58761546	135	Y	NLSEDEyYSEEER	xxxEDxpYxxxxxx
NP_001009999.1	58761544	135	Y	NLSEDEyYSEEER	xxxEDxpYxxxxxx
NP_060554.3	50897852	1737	Y	RKTEDTyFISSAG	xxxEDxpYxxxxxx
NP_001078935.1	146231977	120	Y	RHYEDGyPGGSDN	xxxEDxpYxxxxxx
NP_001078936.1	146231994	120	Y	RHYEDGyPGGSDN	xxxEDxpYxxxxxx
NP_001078937.1	146231948	120	Y	RHYEDGyPGGSDN	xxxEDxpYxxxxxx
NP_001078938.1	146231975	120	Y	RHYEDGyPGGSDN	xxxEDxpYxxxxxx
NP_001322.1	10835010	221	Y	RHYEDGyPGGSDN	xxxEDxpYxxxxxx
NP_001078927.1	146231940	221	Y	RHYEDGyPGGSDN	xxxEDxpYxxxxxx
NP_001078928.1	146231962	221	Y	RHYEDGyPGGSDN	xxxEDxpYxxxxxx
NP_001078929.1	146231938	221	Y	RHYEDGyPGGSDN	xxxEDxpYxxxxxx
NP_001078930.1	146231968	221	Y	RHYEDGyPGGSDN	xxxEDxpYxxxxxx
NP_001078931.1	146231942	221	Y	RHYEDGyPGGSDN	xxxEDxpYxxxxxx
NP_001078932.1	146231970	120	Y	RHYEDGyPGGSDN	xxxEDxpYxxxxxx
NP_001078933.1	146231991	120	Y	RHYEDGyPGGSDN	xxxEDxpYxxxxxx
NP_001078934.1	146231946	120	Y	RHYEDGyPGGSDN	xxxEDxpYxxxxxx
NP_060230.5	116812586	389	Y	SLLEDPyPMVRST	xxxEDxpYxxxxxx
NP_005817.1	5031755	435	Y	TAYEDYyYHPPPR	xxxEDxpYxxxxxx
NP_003984.2	47717134	51	Y	RRREDSyHVRSRS	xxxEDxpYxxxxxx
NP_001282.1	4557477	51	Y	RRREDSyHVRSRS	xxxEDxpYxxxxxx
NP_055750.2	37595548	492	Y	PRSEDIyADPAAY	xxxEDxpYxxxxxx
NP_055202.1	7657293	156	Y	DEDEDDyHNPGYL	xxxEDxpYxxxxxx
NP_001014987.1	62739155	127	Y	DEDEDDyHNPGYL	xxxEDxpYxxxxxx
NP_001014988.1	62739157	126	Y	DEDEDDyHNPGYL	xxxEDxpYxxxxxx
NP_001014989.2	239049118	163	Y	DEDEDDyHNPGYL	xxxEDxpYxxxxxx
AAH42753.1	27502907	443	Y	NIGEDTyDIVIPV	xxxEDxpYxxxxxx
NP_006768.1	5803229	442	Y	NIGEDTyDIVIPV	xxxEDxpYxxxxxx
NP_005018.1	4826908	605	Y	NETEDQyALMEDE	xxxEDxpYxxxxxx
NP_898868.1	34335262	601	Y	EISEDVyTAVEHS	xxxEDxpYxxxxxx
NP_036540.3	34335266	601	Y	EISEDVyTAVEHS	xxxEDxpYxxxxxx
NP_898869.1	34335264	576	Y	EISEDVyTAVEHS	xxxEDxpYxxxxxx
NP_065994.1	55749769	33	Y	SSPEDRyEEQERS	xxxEDxpYxxxxxx
NP_055382.2	44662836	362	Y	PPAEDVyDVPPPA	xxxEDxpYxxxxxx
NP_057211.4	42476193	124	Y	ESSEDQyVLRGSC	xxxEDxpYxxxxxx
NP_036581.1	9558759	27	Y	NLEEDDyLHKDTG	xxxEDxpYxxxxxx
NP_003248.3	116875767	132	Y	DNEEDSyDEEIHD	xxxEDxpYxxxxxx
NP_783297.2	116875765	132	Y	DNEEDSyDEEIHD	xxxEDxpYxxxxxx
NP_689543.1	22748721	404	Y	TGPEDSySSSAIH	xxxEDxpYxxxxxx
NP_001035946.1	109715866	404	Y	TGPEDSySSSAIH	xxxEDxpYxxxxxx
NP_057632.2	29550838	351	Y	LRGEDDyNMDENE	xxxEDxpYxxxxxx
NP_808800.1	29550850	351	Y	LRGEDDyNMDENE	xxxEDxpYxxxxxx
NP_003740.2	38683860	184	Y	AGAEDSyGLVAPA	xxxEDxpYxxxxxx
NP_066124.1	10862703	905	Y	VYEEDSyVKRSQG	xxxEDxpYxxxxxx
NP_065681.1	10862701	905	Y	VYEEDSyVKRSQG	xxxEDxpYxxxxxx
NP_003031.3	156071474	72	Y	YGEEDFyYHRQSS	xxxEDxpYxxxxxx
NP_874365.2	45827731	834	Y	LRPEDDySPRERR	xxxEDxpYxxxxxx
NP_056171.2	45827729	834	Y	LRPEDDySPRERR	xxxEDxpYxxxxxx
NP_002022.1	4503787	387	Y	VDNEDIyESRHEI	xxxEDxpYxxxxxx
NP_005419.2	7108367	142	Y	VGDEDIySGLSDQ	xxxEDxpYxxxxxx
NP_000121.2	105990535	693	Y	DDDEDSyEIFEPP	xxxEDxpYxxxxxx
NP_002604.1	4505695	373	Y	EDDEDCyGNYDNL	xxxEDxpYxxxxxx
NP_112558.2	47680169	246	Y	EDDEDCyGNYDNL	xxxEDxpYxxxxxx
NP_055995.4	118918403	1638	Y	EKTEDYyENLGRA	xxxEDxpYxxxxxx
NP_878918.2	118918407	1638	Y	EKTEDYyENLGRA	xxxEDxpYxxxxxx
NP_150092.2	110347416	27	Y	KVEEDEyEDSSSN	xxxEDxpYxxxxxx
NP_004094.3	27886584	580	Y	IEDEDYyKASVTR	xxxEDxpYxxxxxx
NP_775267.1	27886588	580	Y	IEDEDYyKASVTR	xxxEDxpYxxxxxx
NP_775266.1	27886586	580	Y	IEDEDYyKASVTR	xxxEDxpYxxxxxx
NP_775268.1	27886590	580	Y	IEDEDYyKASVTR	xxxEDxpYxxxxxx
NP_006133.1	5454052	213	Y	TLSEDSyKDSTLI	xxxEDxpYxxxxxx
NP_004291.1	4757714	132	Y	LIIEDPyYGNDSD	xxxEDxpYxxxxxx
NP_009030.1	6005988	132	Y	LIIEDPyYGNDSD	xxxEDxpYxxxxxx
NP_060072.1	33457350	181	Y	YNSEDEyEAAAAR	xxxEDxpYxxxxxx
NP_005226.1	4885215	1202	Y	PKAEDEyVNEPLY	xxxEDxpYxxxxxx
NP_003396.1	4507951	216	Y	TLNEDSyKDSTLI	xxxEDxpYxxxxxx
NP_006557.2	171460997	322	Y	DTREDIyVNYPTF	xxxEDxpYxxxxxx
NP_003748.1	4503513	308	Y	SGGEDGyVRIHYF	xxxEDxpYxxxxxx
P06753	136085	221	Y	SQKEDKyEEEIKI	xxxEDxpYxxxxxx
NP_689476.2	114155140	222	Y	SQKEDKyEEEIKI	xxxEDxpYxxxxxx
NP_705935.1	24119203	185	Y	SQKEDKyEEEIKI	xxxEDxpYxxxxxx
NP_001036816.1	114155144	185	Y	SQKEDKyEEEIKI	xxxEDxpYxxxxxx
NP_001036817.1	114155146	185	Y	SQKEDKyEEEIKI	xxxEDxpYxxxxxx
NP_001036818.1	114155148	185	Y	SQKEDKyEEEIKI	xxxEDxpYxxxxxx
NP_006347.1	5453559	86	Y	PVPEDKyTAQVDA	xxxEDxpYxxxxxx
NP_612451.1	19923969	38	Y	KELEDAyWKDDDK	xxxEDxpYxxxxxx
NP_055890.1	53832026	924	Y	SSLEDTyGAGDGL	xxxEDxpYxxxxxx
NP_002822.2	18104989	564	Y	KHKEDVyENLHTK	xxxEDxpYxxxxxx
NP_004422.2	32967311	575	Y	QSPEDVyFSKSEQ	xxxEDxpYxxxxxx
NP_002145.3	38327039	336	Y	LKKEDIyAVEIVG	xxxEDxpYxxxxxx
NP_127492.1	14670350	398	Y	SHVEDLyVEGLPE	xxxEDxpYxxxxxx
NP_127493.1	14670352	378	Y	SHVEDLyVEGLPE	xxxEDxpYxxxxxx
NP_127494.1	14670354	377	Y	SHVEDLyVEGLPE	xxxEDxpYxxxxxx
NP_001509.3	169881252	357	Y	SHVEDLyVEGLPE	xxxEDxpYxxxxxx
NP_005347.3	112789546	393	Y	RLIEDNyYTAREG	xxxEDxpYxxxxxx
NP_001036236.1	112789548	393	Y	RLIEDNyYTAREG	xxxEDxpYxxxxxx
NP_006796.1	5803036	180	Y	VPKEDIySGGGGG	xxxEDxpYxxxxxx
NP_005911.1	5174545	117	Y	PLLEDKyRRASEE	xxxEDxpYxxxxxx
NP_055706.1	7657441	70	Y	EDEEDDyQQKRKG	xxxEDxpYxxxxxx
NP_001952.1	4503483	443	Y	GKKEDLyLKPIQR	xxxEDxpYxxxxxx
NP_446464.1	16950633	87	Y	ALYEDRyLLGTSL	xxxEDxpYxxxxxx
NP_000041.2	53759107	87	Y	ALYEDRyLLGTSL	xxxEDxpYxxxxxx
NP_078893.2	58331272	599	Y	IAIEDPySVKRNV	xxxEDxpYxxxxxx
NP_001370.1	4503351	969	Y	PVDEDLyPEHYRK	xxxEDxpYxxxxxx
NP_006261.1	5454028	66	Y	PTIEDSyTKICSV	xxxEDxpYxxxxxx
NP_036529.1	8393956	294	Y	FEVEDGyDLEAVL	xxxEDxpYxxxxxx
NP_056510.2	148727368	720	Y	PKLEDFyRFSWED	xxxEDxpYxxxxxx
NP_002244.1	11321597	996	Y	EAPEDLyKDFLTL	xxxEDxpYxxxxxx
NP_006268.2	194294521	968	Y	EEPEALyAAVNKK	xxxExxpYxxxxxx
NP_062541.3	194294523	941	Y	EEPEALyAAVNKK	xxxExxpYxxxxxx
NP_671494.2	194294525	968	Y	EEPEALyAAVNKK	xxxExxpYxxxxxx
NP_004704.2	32130516	754	Y	SEDEGEyEEVRKD	xxxExxpYxxxxxx
NP_991403.1	45545424	615	Y	EEEEEAyYPPAPP	xxxExxpYxxxxxx
NP_057009.3	45505163	596	Y	EEEEEAyYPPAPP	xxxExxpYxxxxxx
NP_991404.1	45593136	547	Y	EEEEEAyYPPAPP	xxxExxpYxxxxxx
NP_003965.2	41406050	299	Y	RGQEGEyAVPFDA	xxxExxpYxxxxxx
NP_958728.1	41406052	145	Y	RGQEGEyAVPFDA	xxxExxpYxxxxxx
NP_001250.1	4502741	24	Y	EIGEGAyGKVFKA	xxxExxpYxxxxxx
NP_000433.3	110347451	713	Y	KDTETVySEVRKA	xxxExxpYxxxxxx
NP_004926.1	4826675	15	Y	KIGEGTyGTVFKA	xxxExxpYxxxxxx
NP_003874.2	13128862	404	Y	RGPEENySRPEAP	xxxExxpYxxxxxx
NP_036419.3	187608516	742	Y	RESEGLyGQPGDE	xxxExxpYxxxxxx
NP_004482.4	150417981	1105	Y	NEEENIySVPHDS	xxxExxpYxxxxxx
NP_077318.1	25121938	1105	Y	NEEENIySVPHDS	xxxExxpYxxxxxx
BAB14710.1	10435947	31	Y	LEDEGLyTGVRPE	xxxExxpYxxxxxx
NP_001073991.2	197209974	315	Y	LEDEGLyTGVRPE	xxxExxpYxxxxxx
AAH11772.1	15079974	1197	Y	ESEEELySSCRQL	xxxExxpYxxxxxx
NP_002652.2	117320537	1197	Y	ESEEELySSCRQL	xxxExxpYxxxxxx
NP_001789.2	16936528	15	Y	KIGEGTyGVVYKA	xxxExxpYxxxxxx
NP_439892.2	166362719	15	Y	KIGEGTyGVVYKA	xxxExxpYxxxxxx
NP_001249.1	4557439	15	Y	KIGEGTyGVVYKA	xxxExxpYxxxxxx
NP_722549.2	27436917	323	Y	EETEYEySGSEEE	xxxExxpYxxxxxx
NP_733763.1	24850117	323	Y	EETEYEySGSEEE	xxxExxpYxxxxxx
NP_056531.1	7657335	323	Y	EETEYEySGSEEE	xxxExxpYxxxxxx
NP_001020108.1	68161546	323	Y	EETEYEySGSEEE	xxxExxpYxxxxxx
NP_060204.1	8923243	262	Y	EYHEPVyANPFYR	xxxExxpYxxxxxx
NP_009176.2	27262647	349	Y	ASREGKyIPLPQR	xxxExxpYxxxxxx
NP_663760.1	27262645	349	Y	ASREGKyIPLPQR	xxxExxpYxxxxxx
NP_680781.1	27262651	349	Y	ASREGKyIPLPQR	xxxExxpYxxxxxx
NP_680782.1	27262653	349	Y	ASREGKyIPLPQR	xxxExxpYxxxxxx
NP_057627.2	118197279	344	Y	EEREIQyAPLSFH	xxxExxpYxxxxxx
NP_055200.1	7657570	437	Y	EEREIQyAPLSFH	xxxExxpYxxxxxx
NP_620637.1	20986523	357	Y	EWKELIyKEVMDL	xxxExxpYxxxxxx
NP_002741.1	4506095	357	Y	EWKELIyKEVMDL	xxxExxpYxxxxxx
NP_620634.1	20986519	357	Y	EWKELIyKEVMDL	xxxExxpYxxxxxx
NP_620635.1	20986521	357	Y	EWKELIyKEVMDL	xxxExxpYxxxxxx
NP_004936.2	56549119	559	Y	EEKEKKyMLPLDN	xxxExxpYxxxxxx
NP_001005362.1	56549125	559	Y	EEKEKKyMLPLDN	xxxExxpYxxxxxx
NP_001005360.1	56549121	563	Y	EEKEKKyMLPLDN	xxxExxpYxxxxxx
NP_001005361.1	56549123	563	Y	EEKEKKyMLPLDN	xxxExxpYxxxxxx
NP_689739.4	119120897	938	Y	DHLEGLyAKVNKP	xxxExxpYxxxxxx
NP_476518.4	119120903	931	Y	DHLEGLyAKVNKP	xxxExxpYxxxxxx
NP_001001330.1	47679089	209	Y	EEAEGPySDNEML	xxxExxpYxxxxxx
NP_055950.1	57634534	1986	Y	LDIEGLySKVRSR	xxxExxpYxxxxxx
NP_002304.3	51173711	357	Y	TSSESIySRPGSS	xxxExxpYxxxxxx
NP_006711.3	51173717	69	Y	TSSESIySRPGSS	xxxExxpYxxxxxx
NP_001003408.1	51173715	325	Y	TSSESIySRPGSS	xxxExxpYxxxxxx
NP_001003407.1	51173713	297	Y	TSSESIySRPGSS	xxxExxpYxxxxxx
CAA77669.1	35119	1774	Y	ESLESLyFTPIPA	xxxExxpYxxxxxx
NP_006176.2	71361682	1774	Y	ESLESLyFTPIPA	xxxExxpYxxxxxx
NP_001261.2	68299795	1068	Y	KELEEIyMLPRMR	xxxExxpYxxxxxx
NP_065821.1	16262452	105	Y	ELPENPySQVKGF	xxxExxpYxxxxxx
NP_065823.1	32698730	218	Y	SGSESGyTTPKKR	xxxExxpYxxxxxx
NP_004422.2	32967311	772	Y	DDPEATyTTSGGK	xxxExxpYxxxxxx
NP_004431.1	4758282	791	Y	DDPEAVyTTTGGK	xxxExxpYxxxxxx
NP_036412.1	7110661	262	Y	GGSEYKyTPPTQP	xxxExxpYxxxxxx
NP_803183.1	29029589	260	Y	GGSEYKyTPPTQP	xxxExxpYxxxxxx
NP_803188.1	29029591	260	Y	GGSEYKyTPPTQP	xxxExxpYxxxxxx
NP_663719.1	22035604	321	Y	EKDETEyEYSGSE	xxxExxpYxxxxxx
NP_004825.2	22035602	321	Y	EKDETEyEYSGSE	xxxExxpYxxxxxx
NP_663720.1	22035606	321	Y	EKDETEyEYSGSE	xxxExxpYxxxxxx
NP_055843.1	55741807	321	Y	EKDETEyEYSGSE	xxxExxpYxxxxxx
NP_055082.1	7657234	84	Y	EELESQyQQSMDS	xxxExxpYxxxxxx
NP_722549.2	27436917	321	Y	EKEETEyEYSGSE	xxxExxpYxxxxxx
NP_733763.1	24850117	321	Y	EKEETEyEYSGSE	xxxExxpYxxxxxx
NP_056531.1	7657335	321	Y	EKEETEyEYSGSE	xxxExxpYxxxxxx
NP_001020108.1	68161546	321	Y	EKEETEyEYSGSE	xxxExxpYxxxxxx
NP_005500.4	148528998	915	Y	WQPEEHySSSPEK	xxxExxpYxxxxxx
NP_002988.3	29568086	286	Y	KKDEGSySLEEPK	xxxExxpYxxxxxx
NP_001006947.1	55749480	286	Y	KKDEGSySLEEPK	xxxExxpYxxxxxx
NP_059867.2	27262643	349	Y	ASREGKyIPLPHR	xxxExxpYxxxxxx
NP_997667.1	47078231	155	Y	KLGEGTyATVFKG	xxxExxpYxxxxxx
NP_997668.1	47078233	185	Y	KLGEGTyATVFKG	xxxExxpYxxxxxx
NP_068751.4	27883866	441	Y	GRPEGQySEDEDT	xxxExxpYxxxxxx
NP_056121.2	260064009	205	Y	EIHEGIyNMLMLL	xxxExxpYxxxxxx
NP_001372.1	4503357	402	Y	EGYELPyNPATDD	xxxExxpYxxxxxx
NP_004482.4	150417981	1104	Y	RNEEENyYSVPHD	xxxExxpYxxxxxx
NP_077318.1	25121938	1104	Y	RNEEENyYSVPHD	xxxExxpYxxxxxx
BAA18998.1	1912057	117	Y	VGEEEHyYSFPNK	xxxExxpYxxxxxx
NP_002850.2	170932516	117	Y	VGEEEHyYSFPNK	xxxExxpYxxxxxx
NP_006192.1	5453860	176	Y	KLGEGTyATVYKG	xxxExxpYxxxxxx
NP_148978.2	197333744	182	Y	KLGEGTyATVYKG	xxxExxpYxxxxxx
NP_002586.2	37595545	203	Y	KLGEGTyATVYKG	xxxExxpYxxxxxx
NP_004808.2	42518070	506	Y	PEDEAIyGPNTKM	xxxExxpYxxxxxx
NP_963923.1	42518065	506	Y	PEDEAIyGPNTKM	xxxExxpYxxxxxx
NP_699205.1	23503313	208	Y	RDEESPyATSLYH	xxxExxpYxxxxxx
NP_005224.2	21361241	779	Y	DDPEAAyTTRGGK	xxxExxpYxxxxxx
NP_991403.1	45545424	616	Y	EEEEAYyPPAPPP	xxxExxpYxxxxxx
NP_057009.3	45505163	597	Y	EEEEAYyPPAPPP	xxxExxpYxxxxxx
NP_991404.1	45593136	548	Y	EEEEAYyPPAPPP	xxxExxpYxxxxxx
NP_001866.2	21361331	634	Y	GWKEIEyEVVRDA	xxxExxpYxxxxxx
NP_955356.1	40807496	373	Y	TSRESNyFGLSPE	xxxExxpYxxxxxx
NP_005900.2	153945728	1410	Y	IGSESAyESFLSA	xxxExxpYxxxxxx
NP_114399.1	14165456	1284	Y	IGSESAyESFLSA	xxxExxpYxxxxxx
NP_005222.2	20357552	446	Y	TEPEPVySMEAAD	xxxExxpYxxxxxx
NP_612632.1	20357556	409	Y	TEPEPVySMEAAD	xxxExxpYxxxxxx
NP_004831.1	22027525	470	Y	EEKEERyLMLFSN	xxxExxpYxxxxxx
NP_071350.2	20127607	11	Y	KGDEEEyWNSSKF	xxxExxpYxxxxxx
NP_002822.2	18104989	536	Y	KGQESEyGNITYP	xxxExxpYxxxxxx
NP_536858.1	18104991	538	Y	KGQESEyGNITYP	xxxExxpYxxxxxx
NP_536859.1	18104993	536	Y	KGQESEyGNITYP	xxxExxpYxxxxxx
NP_003969.2	20149528	345	Y	ERNEGVyTAIAVQ	xxxExxpYxxxxxx
NP_116262.2	24497612	19	Y	AAREELySKVTPR	xxxExxpYxxxxxx
NP_065819.1	55926200	112	Y	LKREAEyFQLPDL	xxxExxpYxxxxxx
NP_060377.1	8923579	40	Y	NGAEPNyHSLPSA	xxxExxpYxxxxxx
NP_006136.1	5453690	176	Y	VSLEEIySGCTKK	xxxExxpYxxxxxx
NP_002600.1	4505683	581	Y	DGHEYIyVDPMQL	xxxExxpYxxxxxx
NP_060207.2	41581463	448	Y	ESPEGSyTDDANQ	xxxExxpYxxxxxx
NP_001020119.1	68348709	448	Y	ESPEGSyTDDANQ	xxxExxpYxxxxxx
NP_001777.1	4502709	15	Y	KIGEGTyGVVYKG	xxxExxpYxxxxxx
NP_203698.1	16306492	15	Y	KIGEGTyGVVYKG	xxxExxpYxxxxxx
BAA18998.1	1912057	118	Y	GEEEHVySFPNKQ	xxxExxpYxxxxxx
NP_002850.2	170932516	118	Y	GEEEHVySFPNKQ	xxxExxpYxxxxxx
NP_055313.1	7657138	673	Y	KGREEHyEEEEEE	xxxExxpYxxxxxx
NP_001456.3	42476118	801	Y	RNEEGKyGYVLRS	xxxExxpYxxxxxx
NP_955367.1	40788007	755	Y	RNEEGKyGYVLRS	xxxExxpYxxxxxx
NP_004621.2	42544130	87	Y	PSPEPIyNSEGKR	xxxExxpYxxxxxx
NP_973724.1	42544125	87	Y	PSPEPIyNSEGKR	xxxExxpYxxxxxx
NP_973727.1	42544123	87	Y	PSPEPIyNSEGKR	xxxExxpYxxxxxx
NP_006550.1	5730027	103	Y	MEPENKyLPELMA	xxxExxpYxxxxxx
NP_000393.4	109389365	537	Y	FQYEGTyKWVNPH	xxxExxpYxxxxxx
NP_001035810.1	108773793	507	Y	FQYEGTyKWVNPH	xxxExxpYxxxxxx
NP_003168.2	21361553	352	Y	EVYESPyADPEEI	xxxExxpYxxxxxx
NP_057165.3	93102361	766	Y	SGDEVQyGDVPVE	xxxExxpYxxxxxx
NP_056057.2	206597513	492	Y	KPLEKHySVVLPT	xxxExxpYxxxxxx
NP_631920.1	21264597	492	Y	KPLEKHySVVLPT	xxxExxpYxxxxxx
NP_001035207.1	92091600	737	Y	KPLEKHySVVLPT	xxxExxpYxxxxxx
NP_061936.2	19923497	226	Y	INQEGEyIKMFMR	xxxExxpYxxxxxx
NP_073557.3	38488720	267	Y	RRTEEKyGGDSDH	xxxExxpYxxxxxx
NP_055843.1	55741807	323	Y	DETEYEySGSEEE	xxxExxpYxxxxxx
NP_071394.2	21735569	93	Y	ENKENLyAGKNTK	xxxExxpYxxxxxx
AAA60120.1	450277	536	Y	ETEESEyDSEHEN	xxxExxpYxxxxxx
NP_006188.3	134142826	535	Y	ETEESEyDSEHEN	xxxExxpYxxxxxx
NP_631897.1	21040235	63	Y	KLGEGSyATVYKG	xxxExxpYxxxxxx
NP_036275.1	8393259	51	Y	TKEEATyGVWAER	xxxExxpYxxxxxx
NP_001008697.1	56788356	51	Y	TKEEATyGVWAER	xxxExxpYxxxxxx
NP_057227.2	20149635	167	Y	PEEESAyVAGEKR	xxxExxpYxxxxxx
NP_872289.1	33286434	56	Y	PEEESAyVAGEKR	xxxExxpYxxxxxx
NP_068713.2	21536466	481	Y	RKKETRyGEVFEP	xxxExxpYxxxxxx
NP_001690.2	21536468	472	Y	RKKETRyGEVFEP	xxxExxpYxxxxxx
NP_056060.2	140161500	455	Y	EEDEHPyELLLTA	xxxExxpYxxxxxx
NP_056075.1	52138513	600	Y	EQYEKAyLKSLDH	xxxExxpYxxxxxx
NP_060910.3	63054864	163	Y	LGMEGPyEVLKDS	xxxExxpYxxxxxx
NP_001073940.1	122937343	925	Y	LSSENPyATIRDL	xxxExxpYxxxxxx
NP_006793.1	5803167	378	Y	EENEIIyNPKNLP	xxxExxpYxxxxxx
NP_079165.3	46391075	215	Y	VKEENHyLTPRSV	xxxExxpYxxxxxx
NP_073582.2	110349780	303	Y	RPNEFKyMSVIAE	xxxExxpYxxxxxx
NP_001036011.1	110349782	235	Y	RPNEFKyMSVIAE	xxxExxpYxxxxxx
NP_000393.4	109389365	431	Y	QPNEAVyTKMMTK	xxxExxpYxxxxxx
NP_001035810.1	108773793	401	Y	QPNEAVyTKMMTK	xxxExxpYxxxxxx
NP_116126.2	27436951	495	Y	EGEEIAyKFTPKY	xxxExxpYxxxxxx
NP_573566.2	31621305	623	Y	KIPENIyRGIRNL	xxxExxpYxxxxxx
NP_009193.2	31543380	67	Y	AKKEGPyDVVVLP	xxxExxpYxxxxxx
NP_079416.1	13376725	130	Y	KEREKKyLEELKA	xxxExxpYxxxxxx
NP_001973.2	54792100	1199	Y	EDEEYEyMNRRRR	xxxExxpYxxxxxx
NP_055462.2	85797660	699	Y	GVAEPVyKTSQKK	xxxExxpYxxxxxx
NP_060910.3	63054864	341	Y	TVPESTyTSIQGD	xxxExxpYxxxxxx
NP_004435.3	32528301	574	Y	NGREAEySDKHGQ	xxxExxpYxxxxxx
NP_005900.2	153945728	1062	Y	GGAEEQyGFLTTP	xxxExxpYxxxxxx
NP_114399.1	14165456	936	Y	GGAEEQyGFLTTP	xxxExxpYxxxxxx
NP_005834.4	188219625	291	Y	SEPEPVyIDEDKM	xxxExxpYxxxxxx
NP_001448.2	105990514	2502	Y	SSTETCySAIPKA	xxxExxpYxxxxxx
NP_000234.1	4557743	688	Y	LSPENGyWVVIMM	xxxExxpYxxxxxx
NP_001070.2	31455611	319	Y	SVYESPySDPEEL	xxxExxpYxxxxxx
NP_997402.1	46488944	12	Y	SVYESPySDPEEL	xxxExxpYxxxxxx
NP_000987.2	16117791	34	Y	LKIEGVyARDETE	xxxExxpYxxxxxx
NP_006611.1	5729864	513	Y	GKIEAGyIQTGDR	xxxExxpYxxxxxx
NP_001007158.1	55769550	433	Y	TLTEMNySKYGAK	xxxExxpYxxxxxx
NP_055475.2	55769548	433	Y	TLTEMNySKYGAK	xxxExxpYxxxxxx
NP_060190.2	62243734	310	Y	PNQEENyVTPIGD	xxxExxpYxxxxxx
NP_001013863.1	62243769	310	Y	PNQEENyVTPIGD	xxxExxpYxxxxxx
NP_006707.1	5729734	112	Y	PSPESAyTAETTS	xxxExxpYxxxxxx
NP_002004.1	4503727	198	Y	IEPEWAyGKKGQP	xxxExxpYxxxxxx
NP_775924.1	27734935	622	Y	PGKENIyEGDLGL	xxxExxpYxxxxxx
NP_000247.2	148596957	373	Y	KKLEPAyQVSKGH	xxxExxpYxxxxxx
NP_003019.2	106879210	267	Y	GKGESAyYMEPYE	xxxExxpYxxxxxx
NP_443090.2	65293358	176	Y	PGREEVyYYQSEA	xxxExxpYxxxxxx
NP_001017967.2	65301122	176	Y	PGREEVyYYQSEA	xxxExxpYxxxxxx
NP_001073996.1	122937512	280	Y	TPSEYHyLTMGNC	xxxExxpYxxxxxx
AAQ76039.1	34581767	95	Y	EYHEKNyAAALET	xxxExxpYxxxxxx
NP_006695.1	5730041	95	Y	EYHEKNyAAALET	xxxExxpYxxxxxx
NP_001763.3	130979981	340	Y	MDEELHyASLNFH	xxxExxpYxxxxxx
NP_002289.2	167614506	124	Y	YSEEEKyAFVNWI	xxxExxpYxxxxxx
NP_001393.1	4503471	162	Y	DSTEPPySQKRYE	xxxExxpYxxxxxx
NP_004055.1	4757962	74	Y	KPLEGKyEWQEVE	xxxExxpYxxxxxx
NP_001960.2	21361337	405	Y	ENIEVVySKAASV	xxxExxpYxxxxxx
NP_892116.2	37537716	405	Y	ENIEVVySKAASV	xxxExxpYxxxxxx
NP_060710.3	166295173	720	Y	SGLERTyYEAYDP	xxxExxpYxxxxxx
NP_055975.1	24308013	104	Y	SRYEAKyLSGIAH	xxxExxpYxxxxxx
NP_001774.1	4502685	188	Y	YEDENLyEGLNLD	xxxExxpYxxxxxx
NP_067612.1	11038672	150	Y	YEDENLyEGLNLD	xxxExxpYxxxxxx
NP_036212.3	197382691	26	Y	LDTERLySVVFQE	xxxExxpYxxxxxx
NP_055922.1	32698700	816	Y	KDAEYIyPSLESD	xxxExxpYxxxxxx
NP_861448.2	224809432	503	Y	KEAEESyMMAKSL	xxxExxpYxxxxxx
NP_000691.1	4502101	21	Y	ENEEQEyVQTVKS	xxxExxpYxxxxxx
NP_060238.3	21361633	249	Y	ESLELLyLRRNKL	xxxExxpYxxxxxx
NP_073619.2	37537696	576	Y	EAFENAyKLSDDK	xxxExxpYxxxxxx
NP_062536.2	50843820	393	Y	YRNEGFyADPYLY	xxxExxpYxxxxxx
NP_001091970.1	148612813	313	Y	YRNEGFyADPYLY	xxxExxpYxxxxxx
NP_001091971.1	148612857	393	Y	YRNEGFyADPYLY	xxxExxpYxxxxxx
NP_071319.2	40217831	432	Y	VPSEGAyDIILPR	xxxExxpYxxxxxx
NP_061123.3	40217833	399	Y	VPSEGAyDIILPR	xxxExxpYxxxxxx
NP_932170.1	37595565	111	Y	NPQEGLyNELQKD	xxxExxpYxxxxxx
NP_000725.1	4557431	110	Y	NPQEGLyNELQKD	xxxExxpYxxxxxx
NP_003558.1	4502371	266	Y	RCLEEHyGTSPGQ	xxxExxpYxxxxxx
NP_003325.2	23510338	55	Y	DIDEGLySRQLYV	xxxExxpYxxxxxx
NP_695012.1	23510340	55	Y	DIDEGLySRQLYV	xxxExxpYxxxxxx
NP_060232.2	124028527	708	Y	GPLEACyGELGQS	xxxExxpYxxxxxx
NP_945346.2	157671917	414	Y	KSHENQyLEAVND	xxxExxpYxxxxxx
NP_000415.2	119395754	361	Y	TEAESWyQTKYEE	xxxExxpYxxxxxx
NP_001449.3	116805322	2683	Y	TPCEEVyVKHMGN	xxxExxpYxxxxxx
NP_000029.2	53759122	316	Y	TKVEMVySLLSML	xxxExxpYxxxxxx
NP_036243.1	6912280	223	Y	TSPEELyRVFTTQ	xxxExxpYxxxxxx
BAA18998.1	1912057	31	Y	LSEETPySYPTGN	xxxExxpYxxxxxx
NP_002850.2	170932516	31	Y	LSEETPySYPTGN	xxxExxpYxxxxxx
NP_001934.2	116534898	968	Y	IVTERVyAPASTL	xxxExxpYxxxxxx
NP_005148.2	62362414	469	Y	GCPEKVyELMRAC	xxxExxpYxxxxxx
NP_004759.1	4759100	432	Y	DEEEQGyDSEKEK	xxxExxpYxxxxxx
NP_005569.1	5031887	301	Y	RYYEGYyAAGPGY	xxxExxpYxxxxxx
NP_004420.1	4758248	313	Y	RTTENNyCPHYEK	xxxExxpYxxxxxx
NP_005302.3	48762679	67	Y	ASLESLySACSMQ	xxxExxpYxxxxxx
NP_001001549.1	48762693	67	Y	ASLESLySACSMQ	xxxExxpYxxxxxx
NP_001001550.1	48762695	9	Y	ASLESLySACSMQ	xxxExxpYxxxxxx
NP_001001555.1	48762697	9	Y	ASLESLySACSMQ	xxxExxpYxxxxxx
NP_002616.2	118582286	438	Y	CKVESIyLNVEAV	xxxExxpYxxxxxx
NP_570115.1	18594498	14	Y	TDEENVyGLEENA	xxxExxpYxxxxxx
NP_001034229.1	85362737	188	Y	VGAELEyDSEHSD	xxxExxpYxxxxxx
NP_061330.2	32171238	163	Y	EHKEIEyVETVTS	xxxExxpYxxxxxx
NP_078820.2	171542821	156	Y	LGLETVyEKFHPS	xxxExxpYxxxxxx
NP_001743.1	4557014	231	Y	ANGEAVyCKFHYK	xxxExxpYxxxxxx
NP_998754.1	47132519	524	Y	KRTESAyDWTSLS	xxxExxpYxxxxxx
NP_079528.1	23943874	576	Y	KRTESAyDWTSLS	xxxExxpYxxxxxx
NP_976241.1	42740893	576	Y	KRTESAyDWTSLS	xxxExxpYxxxxxx
NP_991403.1	45545424	309	Y	CCPEALyAAGKAA	xxxExxpYxxxxxx
NP_057009.3	45505163	290	Y	CCPEALyAAGKAA	xxxExxpYxxxxxx
NP_002030.2	46370073	589	Y	HDSEENyVPMNPN	xxxExxpYxxxxxx
NP_997006.1	46370071	619	Y	HDSEENyVPMNPN	xxxExxpYxxxxxx
NP_004648.1	4759082	399	Y	VRYEGSyALTSEE	xxxExxpYxxxxxx
NP_861420.1	32455239	280	Y	KILEFLySTSYNM	xxxExxpYxxxxxx
NP_005516.1	5031765	280	Y	KILEFLySTSYNM	xxxExxpYxxxxxx
NP_000204.3	54607035	1207	Y	AQGEGPySSLVSC	xxxExxpYxxxxxx
NP_001005619.1	54607027	1207	Y	AQGEGPySSLVSC	xxxExxpYxxxxxx
NP_001005731.1	54607033	1207	Y	AQGEGPySSLVSC	xxxExxpYxxxxxx
NP_057373.1	7706481	207	Y	EFLEQHyDRFFSE	xxxExxpYxxxxxx
NP_003600.2	21396500	167	Y	EEEEKGyKGKTRK	xxxExxpYxxxxxx
NP_002176.2	28610151	449	Y	SNQEEAyVTMSSF	xxxExxpYxxxxxx
NP_065706.2	21704283	338	Y	TKEEGKyKQNILV	xxxExxpYxxxxxx
NP_004330.1	4757886	174	Y	FKEENPyARFENN	xxxExxpYxxxxxx
NP_056060.2	140161500	946	Y	CGYEANyLGSMLI	xxxExxpYxxxxxx
NP_009172.2	21361380	21	Y	KLAEAKyKERGTV	xxxExxpYxxxxxx
NP_006232.1	5453946	114	Y	EGLEPKyRIQEQE	xxxExxpYxxxxxx
NP_079050.2	40254967	1115	Y	SGGEGQyRERDEF	xxxExxpYxxxxxx
NP_001070254.1	115647981	1354	Y	SGGEGQyRERDEF	xxxExxpYxxxxxx
NP_077734.1	23943920	535	Y	DEFERIyEPLDVK	xxxExxpYxxxxxx
NP_000825.2	167003331	1109	Y	DEIELAyRRRPPR	xxxExxpYxxxxxx
NP_002030.2	46370073	472	Y	PIQEANyVPMTPG	xxxExxpYxxxxxx
NP_997006.1	46370071	472	Y	PIQEANyVPMTPG	xxxExxpYxxxxxx
NP_149115.2	224586875	113	Y	SEAEEQyAHALRS	xxxExxpYxxxxxx
NP_060758.2	194328734	276	Y	SPDELRyLPLNTA	xxxExxpYxxxxxx
NP_579866.2	194328736	274	Y	SPDELRyLPLNTA	xxxExxpYxxxxxx
NP_001447.2	116063573	1047	Y	YEVEVTyDGVPVP	xxxExxpYxxxxxx
NP_001035090.1	90819237	1666	Y	RRQEEGyYSRLEA	xxxExxpYxxxxxx
NP_005477.2	191252812	460	Y	VTTEAIyEEIDAH	xxxExxpYxxxxxx
NP_680780.1	27262649	264	Y	KFNEENyGVKTTY	xxxExxpYxxxxxx
NP_009176.2	27262647	264	Y	KFNEENyGVKTTY	xxxExxpYxxxxxx
NP_059867.2	27262643	264	Y	KFNEENyGVKTTY	xxxExxpYxxxxxx
NP_663760.1	27262645	264	Y	KFNEENyGVKTTY	xxxExxpYxxxxxx
NP_680781.1	27262651	264	Y	KFNEENyGVKTTY	xxxExxpYxxxxxx
NP_680782.1	27262653	264	Y	KFNEENyGVKTTY	xxxExxpYxxxxxx
NP_653249.1	21389483	322	Y	ELREIEyIKNLPI	xxxExxpYxxxxxx
NP_009215.1	6005846	309	Y	LTAEFLyDEVHPK	xxxExxpYxxxxxx
NP_001056.1	4507575	401	Y	CLREAQySMLATW	xxxExxpYxxxxxx
NP_003225.2	189458817	19	Y	FGGEPLyYTRFSL	xxxExxpYxxxxxx
NP_061322.2	21626466	171	Y	ATREPPyRVPRDD	xxxExxpYxxxxxx
NP_954659.1	62750354	171	Y	ATREPPyRVPRDD	xxxExxpYxxxxxx
NP_002030.2	46370073	658	Y	VADERVyYVVVDQ	xxxExxpYxxxxxx
NP_997006.1	46370071	688	Y	VADERVyYVVVDQ	xxxExxpYxxxxxx
NP_004461.2	17149842	112	Y	IPSELGyGERGAP	xxxExxpYxxxxxx
NP_476433.1	17149844	112	Y	IPSELGyGERGAP	xxxExxpYxxxxxx
NP_004604.2	39777597	369	Y	EKSEGTyCCGPVP	xxxExxpYxxxxxx
NP_945189.1	39777599	369	Y	EKSEGTyCCGPVP	xxxExxpYxxxxxx
NP_000700.1	11386135	353	Y	SVDEVNyWDKQDH	xxxExxpYxxxxxx
NP_002651.2	33598948	1253	Y	GSFESRyQQPFED	xxxExxpYxxxxxx
NP_877963.1	33598946	1253	Y	GSFESRyQQPFED	xxxExxpYxxxxxx
NP_002291.1	4557032	240	Y	MVVESAyEVIKLK	xxxExxpYxxxxxx
NP_004937.1	31377468	1220	Y	NNREEMyIRYLYK	xxxExxpYxxxxxx
NP_004703.1	4758528	216	Y	RVCEPCyEQLNRK	xxxExxpYxxxxxx
NP_001527.3	154759421	309	Y	TSPESPyTHWKQT	xxxExxpYxxxxxx
NP_938075.2	150456457	285	Y	TSPESPyTHWKQT	xxxExxpYxxxxxx
NP_938074.2	151301219	291	Y	TSPESPyTHWKQT	xxxExxpYxxxxxx
NP_005408.1	4885609	530	Y	TSTEPQyQPGENL	xxxExxpYxxxxxx
NP_938033.1	38202217	530	Y	TSTEPQyQPGENL	xxxExxpYxxxxxx
NP_073588.1	12232415	453	Y	GKSELPyEELWLE	xxxExxpYxxxxxx
NP_078993.4	205361109	762	Y	IPKEQKyIEEENR	xxxExxpYxxxxxx
NP_001002796.1	50582996	541	Y	IPKEQKyIEEENR	xxxExxpYxxxxxx
NP_001422.1	4503579	773	Y	IREEQEyEEEVEE	xxxExxpYxxxxxx
NP_079495.1	45504382	17	Y	TSGESLyHVLGLD	xxxExxpYxxxxxx
NP_003795.2	57242761	384	Y	LQDEANyHLYGSR	xxxExxpYxxxxxx
NP_001010866.1	58197554	146	Y	PREEGRyDEEVEV	xxxExxpYxxxxxx
NP_001124396.2	262399371	146	Y	PREEGRyDEEVEV	xxxExxpYxxxxxx
NP_006787.1	5802970	689	Y	MVLEKPySEATAR	xxxExxpYxxxxxx
NP_003194.3	44890065	376	Y	LKHESTyLQQLSR	xxxExxpYxxxxxx
NP_006461.3	48255913	531	Y	KFSEPVyAAFWLS	xxxExxpYxxxxxx
NP_003321.3	148277065	183	Y	VVYENAyGQFIGP	xxxExxpYxxxxxx
NP_877393.1	33519426	131	Y	VVYENAyGQFIGP	xxxExxpYxxxxxx
NP_877419.1	33519428	131	Y	VVYENAyGQFIGP	xxxExxpYxxxxxx
NP_877420.1	33519430	131	Y	VVYENAyGQFIGP	xxxExxpYxxxxxx
NP_001087240.1	148277071	281	Y	VVYENAyGQFIGP	xxxExxpYxxxxxx
NP_060719.4	58535451	461	Y	KAMENRyKSLLSE	xxxExxpYxxxxxx
NP_001011649.1	58535453	461	Y	KAMENRyKSLLSE	xxxExxpYxxxxxx
NP_002660.1	4505895	92	Y	QGQEVEyFVAGTH	xxxExxpYxxxxxx
NP_660288.1	21687020	413	Y	QEAEENyVIKREL	xxxExxpYxxxxxx
NP_004094.3	27886584	849	Y	PEKEVGyLEFTGP	xxxExxpYxxxxxx
NP_775267.1	27886588	807	Y	PEKEVGyLEFTGP	xxxExxpYxxxxxx
NP_775266.1	27886586	849	Y	PEKEVGyLEFTGP	xxxExxpYxxxxxx
NP_775268.1	27886590	849	Y	PEKEVGyLEFTGP	xxxExxpYxxxxxx
NP_000409.1	4557669	631	Y	SSGEEGyKPFQDL	xxxExxpYxxxxxx
NP_036252.1	11321634	361	Y	IAAEKKyFSLKPE	xxxExxpYxxxxxx
NP_001009555.3	193083141	452	Y	KQTENNyLECQKG	xxxExxpYxxxxxx
NP_068713.2	21536466	821	Y	EPDEILyVNMDEG	xxxExxpYxxxxxx
NP_066018.1	15147335	127	Y	YRREGSyDRYLRM	xxxExxpYxxxxxx
NP_005796.1	5031981	32	Y	DTAEQVyISSLAL	xxxExxpYxxxxxx
NP_005710.1	5031597	47	Y	IVDEAIyYFKANV	xxxExxpYxxxxxx
NP_001032242.1	82546824	465	Y	SVPEYRySQSAPG	xxxExxpYxxxxxx
NP_055210.2	158631203	138	Y	KVEEPSyYESVRV	xxxExxpYxxxxxx
NP_057396.1	7706501	114	Y	RKLEVEyEQKRAQ	xxxExxpYxxxxxx
NP_060896.1	55769589	93	Y	DRVEQEyVASAMH	xxxExxpYxxxxxx
NP_056069.2	46852172	702	Y	LVREANyIAEELD	xxxExxpYxxxxxx
NP_005557.1	5031857	239	Y	QVVESAyEVIKLK	xxxExxpYxxxxxx
NP_563615.3	54792129	750	Y	APDELVyQVPQST	xxxExxpYxxxxxx
NP_031368.1	6679074	79	Y	RDQEKPyFSSFDS	xxxExxpYxxxxxx
NP_055569.1	7662647	416	Y	GHREKTySECEDG	xxxExxpYxxxxxx
NP_005905.2	33469919	193	Y	DITEPLyMQRLGE	xxxExxpYxxxxxx
NP_877423.1	33469917	193	Y	DITEPLyMQRLGE	xxxExxpYxxxxxx
NP_004216.2	110825984	447	Y	GDKEKCyPPSPPP	xxxExxpYxxxxxx
NP_000336.1	4507109	133	Y	MPSEEGyQDYEPE	xxxExxpYxxxxxx
NP_076991.3	122114654	178	Y	EESEIIyDFCMCN	xxxExxpYxxxxxx
NP_003650.1	4501993	296	Y	QLKESGyCTGHEP	xxxExxpYxxxxxx
NP_115979.3	54112382	223	Y	AIAEMKyPKVKKY	xxxExxpYxxxxxx
NP_001005366.1	54112380	192	Y	AIAEMKyPKVKKY	xxxExxpYxxxxxx
NP_001146.2	71773329	30	Y	QDAEALyTAMKGF	xxxExxpYxxxxxx
NP_004024.2	71773415	30	Y	QDAEALyTAMKGF	xxxExxpYxxxxxx
NP_006576.2	48762932	30	Y	GLEEAVyRNIQAC	xxxExxpYxxxxxx
NP_000108.1	4557553	99	Y	DYYEESyFTTRTY	xxxExxpYxxxxxx
NP_000962.2	15431301	155	Y	SVNELIyKRGYGK	xxxExxpYxxxxxx
NP_004230.2	190194412	1479	Y	RGKETEyQALQET	xxxExxpYxxxxxx
NP_001059.2	19913408	1604	Y	ARKEVKyFAESDE	xxxExxpYxxxxxx
NP_057630.1	7706083	391	Y	LTTELKySRLPVA	xxxExxpYxxxxxx
NP_005556.1	5031855	423	Y	SLNEEWyVSYITR	xxxExxpYxxxxxx
AAD42222.1	5353738	660	Y	LDGENIyIRHSSL	xxxExxpYxxxxxx
NP_002341.1	4505055	316	Y	TREEPIyIITEYM	xxxExxpYxxxxxx
NP_005532.2	40254823	864	Y	KTREKLyDFVKTE	xxxExxpYxxxxxx
NP_001017915.1	64085167	865	Y	KTREKLyDFVKTE	xxxExxpYxxxxxx
NP_002304.3	51173711	410	Y	ITYEPFyTSGYDD	xxxExxpYxxxxxx
NP_006711.3	51173717	122	Y	ITYEPFyTSGYDD	xxxExxpYxxxxxx
NP_001003408.1	51173715	378	Y	ITYEPFyTSGYDD	xxxExxpYxxxxxx
NP_001003407.1	51173713	350	Y	ITYEPFyTSGYDD	xxxExxpYxxxxxx
NP_976217.1	42716291	437	Y	LDGENIyIRHSNL	xxxExxpYxxxxxx
NP_004428.1	4758274	418	Y	LDGENIyIRHSNL	xxxExxpYxxxxxx
NP_006740.1	5803173	377	Y	PAQESNyRLLRRN	xxxExxpYxxxxxx
NP_031370.2	33356179	476	Y	EDSEIRyLSADSG	xxxExxpYxxxxxx
AAC50911.1	1743873	346	Y	LSSETQySVDTRR	xxxExxpYxxxxxx
NP_003548.1	4505815	333	Y	LSSETQySVDTRR	xxxExxpYxxxxxx
NP_006563.2	24111250	44	Y	LSREKTyVKRLVK	xxxExxpYxxxxxx
NP_000409.1	4557669	603	Y	PPGEAGyKAFSSL	xxxExxpYxxxxxx
NP_057441.1	7705373	229	Y	KISENSySLDDLE	xxxExxpYxxxxxx
NP_006833.2	55749531	371	Y	ADVEIEyVTEEPE	xxxExxpYxxxxxx
NP_056456.1	7661666	288	Y	WKNEKLyCGRHYC	xxxExxpYxxxxxx
NP_690042.1	23238188	279	Y	WKNEKLyCGRHYC	xxxExxpYxxxxxx
NP_005909.2	21735621	287	Y	QETECTyFSTPLL	xxxExxpYxxxxxx
NP_067051.2	226509740	732	Y	PKREVLyDSEGLS	xxxExxpYxxxxxx
NP_005704.1	5031717	121	Y	HKTESGyGSESSL	xxxExxpYxxxxxx
NP_112729.1	14165452	121	Y	HKTESGyGSESSL	xxxExxpYxxxxxx
NP_892021.1	33946297	115	Y	GRFESSyRNSLDS	xxxExxpYxxxxxx
NP_444252.1	16753215	99	Y	QGGEPTyNVAVGR	xxxExxpYxxxxxx
NP_002619.1	4505751	99	Y	QGGEPTyNVAVGR	xxxExxpYxxxxxx
NP_002028.1	4503823	531	Y	TATEPQyQPGENL	xxxExxpYxxxxxx
NP_694592.1	23510362	528	Y	TATEPQyQPGENL	xxxExxpYxxxxxx
NP_694593.1	23510364	476	Y	TATEPQyQPGENL	xxxExxpYxxxxxx
NP_005424.1	4885661	537	Y	TATEPQyQPGENL	xxxExxpYxxxxxx
NP_005219.2	29725609	869	Y	GAEEKEyHAEGGK	xxxExxpYxxxxxx
NP_001438.1	13787217	1592	Y	VNAEVHySLLKGN	xxxExxpYxxxxxx
NP_065122.1	9966865	523	Y	LPPEVAyFTYARD	xxxExxpYxxxxxx
NP_061848.2	52627149	195	Y	RGQEHKyLLGDAP	xxxExxpYxxxxxx
NP_060473.2	59850762	723	Y	KEIEKVyLDNKLL	xxxExxpYxxxxxx
NP_001008225.1	56550047	710	Y	KEIEKVyLDNKLL	xxxExxpYxxxxxx
NP_002620.1	4505753	92	Y	RLNERHyGGLTGL	xxxExxpYxxxxxx
NP_000281.2	50593010	92	Y	RLNERHyGGLTGL	xxxExxpYxxxxxx
NP_892014.1	150378449	375	Y	PFPELRyLSLAYN	xxxExxpYxxxxxx
NP_079375.3	155029539	580	Y	PLPEASyLPSCQL	xxxExxpYxxxxxx
NP_000282.1	4505763	196	Y	MKKELNyFAKALE	xxxExxpYxxxxxx
NP_109591.1	13489087	282	Y	FKLEESyTLNSDL	xxxExxpYxxxxxx
NP_000552.2	23065544	33	Y	SYEEKKyTMGDAP	xxxExxpYxxxxxx
NP_666533.1	23065547	33	Y	SYEEKKyTMGDAP	xxxExxpYxxxxxx
NP_055894.6	194018476	542	Y	CQIESKyLILLQE	xxxExxpYxxxxxx
NP_005226.1	4885215	1208	Y	YVNEPLyLNTFAN	xxxExxpYxxxxxx
NP_079197.3	193794853	424	Y	RLKELEyCKRNLE	xxxExxpYxxxxxx
NP_071919.2	38570142	243	Y	ITDERVyESIGQY	xxxExxpYxxxxxx
NP_077719.2	24041035	2023	Y	AAREGSyEAAKIL	xxxExxpYxxxxxx
NP_008920.4	121114294	381	Y	VFEEKKyVELDPS	xxxExxpYxxxxxx
NP_001073346.1	121114292	381	Y	VFEEKKyVELDPS	xxxExxpYxxxxxx
NP_002286.2	9845502	139	Y	PLTEASyVNLPTI	xxxExxpYxxxxxx
NP_001012321.1	59859885	139	Y	PLTEASyVNLPTI	xxxExxpYxxxxxx
NP_058632.2	118572601	64	Y	RCPEFFyPELVKN	xxxExxpYxxxxxx
NP_001072982.1	118572603	64	Y	RCPEFFyPELVKN	xxxExxpYxxxxxx
NP_006786.2	30240932	453	Y	TYDEIFyTLSPVN	xxxExxpYxxxxxx
NP_005992.1	17921993	282	Y	ISAEKAyHEQLSV	xxxExxpYxxxxxx
NP_524575.1	17921991	282	Y	ISAEKAyHEQLSV	xxxExxpYxxxxxx
NP_000960.2	14591909	240	Y	DMMEEMyKKAHAA	xxxExxpYxxxxxx
NP_001407.1	4503529	391	Y	RDIETFyNTSIEE	xxxExxpYxxxxxx
NP_056262.3	186659512	1537	Y	PDTEEIyKLTGTG	xxxExxpYxxxxxx
NP_079148.2	221554537	453	Y	STLEAQyRRLLEL	xxxExxpYxxxxxx
NP_886553.2	38201621	594	Y	QPGEQKyEYKSDQ	xxxExxpYxxxxxx
NP_937887.1	38201627	507	Y	QPGEQKyEYKSDQ	xxxExxpYxxxxxx
NP_937885.1	38201625	430	Y	QPGEQKyEYKSDQ	xxxExxpYxxxxxx
NP_004944.2	38201619	398	Y	QPGEQKyEYKSDQ	xxxExxpYxxxxxx
NP_937884.1	38201623	594	Y	QPGEQKyEYKSDQ	xxxExxpYxxxxxx
NP_938011.1	38093637	704	Y	SDSEWNyLHHHHD	xxxExxpYxxxxxx
NP_112179.2	40254978	505	Y	NSDEERyRYREYA	xxxExxpYxxxxxx
NP_703147.2	227497754	538	Y	AALEKTyNTYRSN	xxxExxpYxxxxxx
NP_061027.2	93102379	3058	Y	YREEFIyWIDSSR	xxxExxpYxxxxxx
NP_003322.3	187608615	292	Y	AEGEPCyIRDSGV	xxxExxpYxxxxxx
NP_055140.1	7656991	301	Y	ITDESPyVHYLNT	xxxExxpYxxxxxx
NP_004439.2	54792096	1247	Y	PTAENPyYLGLDV	xxxExxpYxxxxxx
NP_001005862.1	54792098	1217	Y	PTAENPyYLGLDV	xxxExxpYxxxxxx
NP_004850.1	4758012	899	Y	FLRENPyYDSRVV	xxxExxpYxxxxxx
NP_004441.1	4758302	92	Y	WIKEKIyVLLRRQ	xxxExxpYxxxxxx
NP_003240.1	4507491	422	Y	YPREGKyGHAACF	xxxExxpYxxxxxx
NP_006274.2	170763517	730	Y	KQEEQRyQALKIH	xxxExxpYxxxxxx
NP_008855.1	5902076	189	Y	HEGETAyIRVKVD	xxxExxpYxxxxxx
NP_066124.1	10862703	981	Y	NCSEEMyRLMLQC	xxxExxpYxxxxxx
NP_065681.1	10862701	981	Y	NCSEEMyRLMLQC	xxxExxpYxxxxxx
NP_000734.2	19923122	228	Y	NCCEEIyPDITYS	xxxExxpYxxxxxx
NP_056013.2	31581524	896	Y	GYAEKGyAGKAPV	xxxExxpYxxxxxx
NP_001002912.3	83921609	52	Y	ILSEKEyKLNMMK	xxxExxpYxxxxxx
NP_443728.3	93277088	484	Y	NSMETLyHKIFWA	xxxExxpYxxxxxx
NP_005142.1	4827050	285	Y	INQEVKyLFTGLK	xxxExxpYxxxxxx
NP_001032411.1	82880645	250	Y	INQEVKyLFTGLK	xxxExxpYxxxxxx
NP_061819.2	12056473	71	Y	KALERPyTSKHSW	xxxExxpYxxxxxx
NP_001478.1	4503955	116	Y	TALEYVyKGQLQS	xxxExxpYxxxxxx
NP_001008.1	4506685	38	Y	DVKEQIyKLAKKG	xxxExxpYxxxxxx
NP_002898.2	14591904	208	Y	SRLEKAyEARRFT	xxxExxpYxxxxxx
NP_116559.1	14591902	208	Y	SRLEKAyEARRFT	xxxExxpYxxxxxx
NP_055313.1	7657138	641	Y	HNAEETyGENDEN	xxxExxpYxxxxxx
NP_006144.1	5453754	105	Y	DPGERLyDLNMPA	xxxExxpYxxxxxx
NP_909122.1	35493811	15	Y	AMLEAPyKKDENK	xxxExxpYxxxxxx
NP_004893.1	4757926	15	Y	AMLEAPyKKDENK	xxxExxpYxxxxxx
NP_009032.2	21361378	777	Y	LSIEKGyRHWHAD	xxxExxpYxxxxxx
NP_000134.2	19743875	491	Y	TAIELGyLTAEQF	xxxExxpYxxxxxx
NP_000971.1	11415026	63	Y	SSGEIVyCGQVFE	xxxExxpYxxxxxx
NP_004765.2	28559039	1476	Y	SIAEKSyQNSPSS	xxxExxpYxxxxxx
NP_001077007.1	134133226	676	Y	QLREKKyLEDIES	xxxExxpYxxxxxx
NP_031373.2	37675283	398	Y	ETLELLyRITNAQ	xxxExxpYxxxxxx
NP_003968.2	201860300	248	Y	LVVEEYyEVLDHC	xxxExxpYxxxxxx
NP_002454.1	11342664	697	Y	ILKERIyRLTQAR	xxxExxpYxxxxxx
NP_003744.1	4503523	318	Y	LAMEATyINHNFS	xxxExxpYxxxxxx
NP_003167.2	34878904	257	Y	QHLEQEyKKEIND	xxxExxpYxxxxxx
NP_005222.2	20357552	433	Y	FKAELSyRGPVSG	xxxExxpYxxxxxx
NP_612632.1	20357556	396	Y	FKAELSyRGPVSG	xxxExxpYxxxxxx
NP_006752.1	5803225	214	Y	TLSEESyKDSTLI	xxxExxpYxxxxxx
NP_644670.1	21264315	456	Y	VYDELFyTLSPIN	xxxExxpYxxxxxx
NP_002202.2	19743813	782	Y	DTGENPyYKSAVT	xxxExxpYxxxxxx
NP_596867.1	19743823	782	Y	DTGENPyYKSAVT	xxxExxpYxxxxxx
NP_003248.3	116875767	1419	Y	SFGEKRyEPIQAT	xxxExxpYxxxxxx
NP_783297.2	116875765	1339	Y	SFGEKRyEPIQAT	xxxExxpYxxxxxx
NP_004563.2	148664226	12	Y	APAEYGyIRTVLG	xxxExxpYxxxxxx
NP_001005242.2	148664186	12	Y	APAEYGyIRTVLG	xxxExxpYxxxxxx
NP_001558.3	222136583	886	Y	GTRERLyEWISID	xxxExxpYxxxxxx
NP_001973.2	54792100	1222	Y	SLEELGyEYMDVG	xxxExxpYxxxxxx
NP_002451.2	167555104	192	Y	PHPEIPyQCPMTF	xxxExxpYxxxxxx
NP_689759.2	103471995	270	Y	STEERFyKQSSMS	xxxExxpYxxxxxx
NP_001059.2	19913408	152	Y	HKVEKVyVPALIF	xxxExxpYxxxxxx
NP_001010866.1	58197554	161	Y	HHLEQMyKLCRPC	xxxExxpYxxxxxx
NP_001124396.2	262399371	161	Y	HHLEQMyKLCRPC	xxxExxpYxxxxxx
NP_057110.3	166795268	196	Y	LQGEKFyNAGLAY	xxxExxpYxxxxxx
NP_006556.1	5729790	407	Y	HSGEKPyECYICH	xxxExxpYxxxxxx
NP_008896.2	190610012	279	Y	HSGEKPyGCVECG	xxxExxpYxxxxxx
NP_003408.1	4585643	511	Y	HSGEKPyECVECG	xxxExxpYxxxxxx
NP_003408.1	4585643	343	Y	HSGENPyECLECG	xxxExxpYxxxxxx
NP_660303.1	21687100	203	Y	HTDERPyTCDICH	xxxExxpYxxxxxx
NP_443727.2	215598931	200	Y	HTDERPyTCDICH	xxxExxpYxxxxxx
NP_003408.1	4585643	483	Y	HTGEKPyECVECG	xxxExxpYxxxxxx
NP_060126.2	194097464	328	Y	HTGEKPyECVECG	xxxExxpYxxxxxx
NP_008896.2	190610012	335	Y	HTGEKPyECVQCG	xxxExxpYxxxxxx
NP_003405.3	190194429	520	Y	HTGENLyKCKVCA	xxxExxpYxxxxxx
NP_001002836.2	152963637	122	Y	HTGEKPyACLECG	xxxExxpYxxxxxx
NP_001002836.2	152963637	150	Y	HTGEKPyTCPDCG	xxxExxpYxxxxxx
NP_149990.1	15082252	281	Y	HTGEKPyECIKCG	xxxExxpYxxxxxx
NP_694963.2	40255151	250	Y	HTGEKPyKCLECG	xxxExxpYxxxxxx
NP_001034743.1	89001096	218	Y	HTGEKPyKCLECG	xxxExxpYxxxxxx
NP_870992.2	63176661	362	Y	HTGEKPyECKECG	xxxExxpYxxxxxx
NP_003441.1	4508007	382	Y	HTGEKPyQCGQCG	xxxExxpYxxxxxx
NP_115973.1	14211907	513	Y	HTGEKPyKCNECG	xxxExxpYxxxxxx
NP_009112.1	6005810	381	Y	ESSDDDyDDVDIP	xxxxxDpYxxxxxx
NP_001036065.1	110611908	381	Y	ESSDDDyDDVDIP	xxxxxDpYxxxxxx
NP_000383.1	4557481	885	Y	EEEDDDyGLISSV	xxxxxDpYxxxxxx
NP_001035207.1	92091600	231	Y	EFDDSDyDEVPEE	xxxxxDpYxxxxxx
NP_056065.1	21735417	424	Y	SHEDGDyYEVDIN	xxxxxDpYxxxxxx
NP_001003800.1	51479166	424	Y	SHEDGDyYEVDIN	xxxxxDpYxxxxxx
NP_060724.1	8922733	173	Y	DGNDSDyDPKKEA	xxxxxDpYxxxxxx
NP_006259.1	5454004	172	Y	DLDDEDyEEDTPK	xxxxxDpYxxxxxx
NP_073568.2	56118310	146	Y	DDDDSDyGSSKKK	xxxxxDpYxxxxxx
NP_003061.3	48255900	642	Y	EESDSDyEEEDEE	xxxxxDpYxxxxxx
NP_620614.2	48255898	642	Y	EESDSDyEEEDEE	xxxxxDpYxxxxxx
NP_005326.2	167234422	397	Y	DEPEGDyEEVLEP	xxxxxDpYxxxxxx
NP_056130.2	39725634	556	Y	SDEESDyEIDDRD	xxxxxDpYxxxxxx
NP_291029.2	61102725	633	Y	SDEESDyEIDDRD	xxxxxDpYxxxxxx
NP_112182.1	13569879	235	Y	EEDDDDyVEEGEE	xxxxxDpYxxxxxx
NP_073568.2	56118310	26	Y	DDADEDyGRDSGP	xxxxxDpYxxxxxx
NP_067038.1	11034845	161	Y	EEEDDDyPGSYSP	xxxxxDpYxxxxxx
NP_476510.1	17149830	392	Y	DNDQPDyDSVASD	xxxxxDpYxxxxxx
NP_055591.2	21237786	392	Y	DNDQPDyDSVASD	xxxxxDpYxxxxxx
NP_476511.1	17149832	392	Y	DNDQPDyDSVASD	xxxxxDpYxxxxxx
NP_631940.2	206725415	392	Y	DNDQPDyDSVASD	xxxxxDpYxxxxxx
NP_054749.2	41393573	598	Y	SGADSDyENTQSG	xxxxxDpYxxxxxx
NP_001078923.1	146231998	607	Y	SGADSDyENTQSG	xxxxxDpYxxxxxx
NP_115558.3	148529023	377	Y	DSDDSDyENLIDP	xxxxxDpYxxxxxx
NP_476510.1	17149830	592	Y	STPESDyDNTPND	xxxxxDpYxxxxxx
NP_055591.2	21237786	512	Y	STPESDyDNTPND	xxxxxDpYxxxxxx
NP_476511.1	17149832	464	Y	STPESDyDNTPND	xxxxxDpYxxxxxx
NP_006716.3	194018748	662	Y	STDNDDyDDISAA	xxxxxDpYxxxxxx
NP_002591.2	32171241	142	Y	YRSDSDyDLSPKA	xxxxxDpYxxxxxx
NP_001032417.1	82799484	127	Y	YRSDSDyDLSPKA	xxxxxDpYxxxxxx
NP_001032418.1	82799486	142	Y	YRSDSDyDLSPKA	xxxxxDpYxxxxxx
NP_006194.2	32306513	63	Y	YRSDSDyDLSPKS	xxxxxDpYxxxxxx
NP_001973.2	54792100	1260	Y	TTPDEDyEYMNRQ	xxxxxDpYxxxxxx
NP_001002909.1	50962882	916	Y	DSDDSDyASSKHR	xxxxxDpYxxxxxx
NP_127492.1	14670350	248	Y	ESEDPDyYQYNIQ	xxxxxDpYxxxxxx
NP_127493.1	14670352	248	Y	ESEDPDyYQYNIQ	xxxxxDpYxxxxxx
NP_127494.1	14670354	248	Y	ESEDPDyYQYNIQ	xxxxxDpYxxxxxx
NP_001509.3	169881252	248	Y	ESEDPDyYQYNIQ	xxxxxDpYxxxxxx
NP_001347.3	87196351	104	Y	DRGRSDyDGIGSR	xxxxxDpYxxxxxx
NP_076829.1	13514817	104	Y	DRGRSDyDGIGSR	xxxxxDpYxxxxxx
NP_005326.2	167234422	378	Y	PEPENDyEDVEEM	xxxxxDpYxxxxxx
NP_002030.2	46370073	405	Y	DASSQDyYDIPRA	xxxxxDpYxxxxxx
NP_997006.1	46370071	405	Y	DASSQDyYDIPRA	xxxxxDpYxxxxxx
NP_940933.3	41327760	69	Y	ENEESDyHTLPRA	xxxxxDpYxxxxxx
NP_006611.1	5729864	58	Y	PVEEYDyEDLKES	xxxxxDpYxxxxxx
NP_005768.1	5032033	914	Y	YGGDSDyEEEEEE	xxxxxDpYxxxxxx
NP_000866.1	4557665	1165	Y	DIYETDyYRKGGK	xxxxxDpYxxxxxx
NP_000199.2	119395736	1189	Y	DIYETDyYRKGGK	xxxxxDpYxxxxxx
NP_001073285.1	119395738	1177	Y	DIYETDyYRKGGK	xxxxxDpYxxxxxx
NP_001078935.1	146231977	195	Y	GYDDLDyGMMSDY	xxxxxDpYxxxxxx
NP_001078936.1	146231994	195	Y	GYDDLDyGMMSDY	xxxxxDpYxxxxxx
NP_001078937.1	146231948	195	Y	GYDDLDyGMMSDY	xxxxxDpYxxxxxx
NP_001078938.1	146231975	195	Y	GYDDLDyGMMSDY	xxxxxDpYxxxxxx
NP_001322.1	10835010	296	Y	GYDDLDyGMMSDY	xxxxxDpYxxxxxx
NP_001078927.1	146231940	296	Y	GYDDLDyGMMSDY	xxxxxDpYxxxxxx
NP_001078928.1	146231962	296	Y	GYDDLDyGMMSDY	xxxxxDpYxxxxxx
NP_001078929.1	146231938	296	Y	GYDDLDyGMMSDY	xxxxxDpYxxxxxx
NP_001078930.1	146231968	296	Y	GYDDLDyGMMSDY	xxxxxDpYxxxxxx
NP_001078931.1	146231942	296	Y	GYDDLDyGMMSDY	xxxxxDpYxxxxxx
NP_001078932.1	146231970	195	Y	GYDDLDyGMMSDY	xxxxxDpYxxxxxx
NP_001078933.1	146231991	195	Y	GYDDLDyGMMSDY	xxxxxDpYxxxxxx
NP_001078934.1	146231946	195	Y	GYDDLDyGMMSDY	xxxxxDpYxxxxxx
NP_004808.2	42518070	261	Y	RAYDPDyERAYSP	xxxxxDpYxxxxxx
NP_963923.1	42518065	261	Y	RAYDPDyERAYSP	xxxxxDpYxxxxxx
NP_060228.3	148539642	71	Y	DPERSDyEEQQLQ	xxxxxDpYxxxxxx
NP_000724.1	4502671	188	Y	PVPNPDyEPIRKG	xxxxxDpYxxxxxx
NP_680780.1	27262649	241	Y	DSNSDDyDLESDM	xxxxxDpYxxxxxx
NP_009176.2	27262647	241	Y	DSNSDDyDLESDM	xxxxxDpYxxxxxx
NP_059867.2	27262643	241	Y	DSNSDDyDLESDM	xxxxxDpYxxxxxx
NP_663760.1	27262645	241	Y	DSNSDDyDLESDM	xxxxxDpYxxxxxx
NP_680781.1	27262651	241	Y	DSNSDDyDLESDM	xxxxxDpYxxxxxx
NP_680782.1	27262653	241	Y	DSNSDDyDLESDM	xxxxxDpYxxxxxx
NP_057306.2	21071032	33	Y	DEDDEDyVPYVPL	xxxxxDpYxxxxxx
NP_004808.2	42518070	428	Y	QYSDYDyHSSSEK	xxxxxDpYxxxxxx
NP_963923.1	42518065	428	Y	QYSDYDyHSSSEK	xxxxxDpYxxxxxx
NP_004094.3	27886584	579	Y	YIEDEDyYKASVT	xxxxxDpYxxxxxx
NP_775267.1	27886588	579	Y	YIEDEDyYKASVT	xxxxxDpYxxxxxx
NP_775266.1	27886586	579	Y	YIEDEDyYKASVT	xxxxxDpYxxxxxx
NP_775268.1	27886590	579	Y	YIEDEDyYKASVT	xxxxxDpYxxxxxx
NP_000333.1	4507021	8	Y	EELQDDyEDMMEE	xxxxxDpYxxxxxx
NP_055862.1	22095331	962	Y	LKDDYDyVLISSV	xxxxxDpYxxxxxx
NP_002131.2	14165439	280	Y	PPSRRDyDDMSPR	xxxxxDpYxxxxxx
NP_112552.1	14165435	280	Y	PPSRRDyDDMSPR	xxxxxDpYxxxxxx
NP_112553.1	14165437	280	Y	PPSRRDyDDMSPR	xxxxxDpYxxxxxx
NP_062556.2	21361809	272	Y	YGRDRDySDHPSG	xxxxxDpYxxxxxx
NP_001783.2	14589889	785	Y	GEEDQDyDLSQLQ	xxxxxDpYxxxxxx
NP_005566.2	61742777	70	Y	EEDEEDyESSAKL	xxxxxDpYxxxxxx
NP_787116.2	61742775	56	Y	EEDEEDyESSAKL	xxxxxDpYxxxxxx
NP_001007793.1	56118210	644	Y	DIYSTDyYRVGGR	xxxxxDpYxxxxxx
NP_001012331.1	59889558	674	Y	DIYSTDyYRVGGR	xxxxxDpYxxxxxx
NP_071323.1	11995470	193	Y	DEESEDyQNSASI	xxxxxDpYxxxxxx
NP_115853.2	118640875	193	Y	DEESEDyQNSASI	xxxxxDpYxxxxxx
NP_054865.2	14702182	193	Y	DEESEDyQNSASI	xxxxxDpYxxxxxx
NP_115852.1	14702184	193	Y	DEESEDyQNSASI	xxxxxDpYxxxxxx
NP_036428.1	6912460	643	Y	SDEKVDyVQVDKE	xxxxxDpYxxxxxx
NP_536739.1	18105042	643	Y	SDEKVDyVQVDKE	xxxxxDpYxxxxxx
NP_008841.2	33620769	1641	Y	AAFEPDyNESDSE	xxxxxDpYxxxxxx
NP_061173.1	33620716	1607	Y	AAFEPDyNESDSE	xxxxxDpYxxxxxx
NP_054749.2	41393573	383	Y	LDDQHDyDSVASD	xxxxxDpYxxxxxx
NP_001078923.1	146231998	392	Y	LDDQHDyDSVASD	xxxxxDpYxxxxxx
NP_060910.3	63054864	417	Y	VPKENDyESISDL	xxxxxDpYxxxxxx
NP_055202.1	7657293	200	Y	MESIDDyVNVPES	xxxxxDpYxxxxxx
NP_001014987.1	62739155	171	Y	MESIDDyVNVPES	xxxxxDpYxxxxxx
NP_001014988.1	62739157	170	Y	MESIDDyVNVPES	xxxxxDpYxxxxxx
NP_001014989.2	239049118	207	Y	MESIDDyVNVPES	xxxxxDpYxxxxxx
NP_004086.1	4758258	34	Y	QLPPGDySTTPGG	xxxxxDpYxxxxxx
NP_003070.3	21264355	182	Y	AEDPDDyDDGFSM	xxxxxDpYxxxxxx
NP_057297.2	32189376	289	Y	IDDESDyFASDSN	xxxxxDpYxxxxxx
NP_002030.2	46370073	659	Y	ADERVDyVVVDQQ	xxxxxDpYxxxxxx
NP_997006.1	46370071	689	Y	ADERVDyVVVDQQ	xxxxxDpYxxxxxx
NP_848018.1	41281911	455	Y	DGEDADyTHFTNQ	xxxxxDpYxxxxxx
NP_777568.1	28372509	279	Y	DGEDADyTHFTNQ	xxxxxDpYxxxxxx
NP_005991.1	17921989	432	Y	AALEKDyEEVGID	xxxxxDpYxxxxxx
NP_003019.2	106879210	335	Y	DDRPADyYDQPWE	xxxxxDpYxxxxxx
NP_060190.2	62243734	322	Y	DGPAVDyENQDVA	xxxxxDpYxxxxxx
NP_001013863.1	62243769	322	Y	DGPAVDyENQDVA	xxxxxDpYxxxxxx
NP_067674.2	50511936	280	Y	EETNNDyETADGG	xxxxxDpYxxxxxx
NP_060919.2	22325364	839	Y	SRLPVDyYGIPFA	xxxxxDpYxxxxxx
NP_065918.1	22325366	786	Y	SRLPVDyYGIPFA	xxxxxDpYxxxxxx
NP_006171.2	21361306	722	Y	DVYSTDyYRVGGH	xxxxxDpYxxxxxx
NP_001018074.1	65506745	706	Y	DVYSTDyYRVGGH	xxxxxDpYxxxxxx
NP_003595.1	4504733	779	Y	NDSESDyMFMAPG	xxxxxDpYxxxxxx
NP_002244.1	11321597	1059	Y	IYKDPDyVRKGDA	xxxxxDpYxxxxxx
NP_000480.2	20336209	1063	Y	KDELSDyAEKSTG	xxxxxDpYxxxxxx
NP_612114.1	20336205	1025	Y	KDELSDyAEKSTG	xxxxxDpYxxxxxx
NP_612115.1	20336207	859	Y	KDELSDyAEKSTG	xxxxxDpYxxxxxx
NP_060209.3	210147552	78	Y	PEPEQDyDEALGR	xxxxxDpYxxxxxx
NP_057458.4	22035677	795	Y	LSEDTDyEEDEVT	xxxxxDpYxxxxxx
NP_112739.2	22035679	709	Y	LSEDTDyEEDEVT	xxxxxDpYxxxxxx
NP_003248.3	116875767	843	Y	SRHTSDyEDTDTE	xxxxxDpYxxxxxx
NP_783297.2	116875765	843	Y	SRHTSDyEDTDTE	xxxxxDpYxxxxxx
NP_004030.1	4757756	188	Y	DGSVIDyELIDQD	xxxxxDpYxxxxxx
NP_001002858.1	50845388	206	Y	DGSVIDyELIDQD	xxxxxDpYxxxxxx
NP_001002857.1	50845386	188	Y	DGSVIDyELIDQD	xxxxxDpYxxxxxx
NP_060365.7	224593278	175	Y	EASETDySSADEN	xxxxxDpYxxxxxx
NP_003740.2	38683860	675	Y	SCRSDDyMPMSPA	xxxxxDpYxxxxxx
NP_597677.2	47578105	1159	Y	DSDMEDySPPPSL	xxxxxDpYxxxxxx
NP_056199.2	47578107	1159	Y	DSDMEDySPPPSL	xxxxxDpYxxxxxx
NP_055382.2	44662836	666	Y	WMEDYDyVHLQGK	xxxxxDpYxxxxxx
NP_005917.2	50726968	47	Y	SGKRPDyAPMESS	xxxxxDpYxxxxxx
NP_001387.2	18765758	147	Y	DDDNYDyIVKNGE	xxxxxDpYxxxxxx
NP_569120.1	18765752	138	Y	DDDNYDyIVKNGE	xxxxxDpYxxxxxx
NP_567824.1	18765750	147	Y	DDDNYDyIVKNGE	xxxxxDpYxxxxxx
NP_569121.1	18765754	147	Y	DDDNYDyIVKNGE	xxxxxDpYxxxxxx
NP_569122.1	18765756	147	Y	DDDNYDyIVKNGE	xxxxxDpYxxxxxx
NP_116249.2	21361875	204	Y	GDSNDDyDSAGLL	xxxxxDpYxxxxxx
NP_065393.1	24431935	529	Y	QDSETDyVTTDNL	xxxxxDpYxxxxxx
NP_997404.1	47519562	323	Y	QDSETDyVTTDNL	xxxxxDpYxxxxxx
NP_776155.1	28603830	11	Y	NPPPQDyESDDDS	xxxxxDpYxxxxxx
NP_061322.2	21626466	773	Y	DENKDDyTIPDEY	xxxxxDpYxxxxxx
NP_954659.1	62750354	773	Y	DENKDDyTIPDEY	xxxxxDpYxxxxxx
NP_001007158.1	55769550	206	Y	LNDMDDyDSEDDN	xxxxxDpYxxxxxx
NP_055475.2	55769548	206	Y	LNDMDDyDSEDDN	xxxxxDpYxxxxxx
NP_835461.1	30039694	306	Y	VVGGEDyEEVDRY	xxxxxDpYxxxxxx
NP_000206.2	47157315	980	Y	LPLDKDyYVVREP	xxxxxDpYxxxxxx
NP_036529.1	8393956	316	Y	SEHKADySGMSSG	xxxxxDpYxxxxxx
NP_004318.3	82546843	246	Y	CGVDGDyEDAELN	xxxxxDpYxxxxxx
NP_067585.2	82546845	246	Y	CGVDGDyEDAELN	xxxxxDpYxxxxxx
AAA59925.1	292354	2577	Y	RVAETDyEMETQR	xxxxxDpYxxxxxx
NP_000258.1	4557793	2556	Y	RVAETDyEMETQR	xxxxxDpYxxxxxx
NP_001035957.1	109826564	2577	Y	RVAETDyEMETQR	xxxxxDpYxxxxxx
NP_005667.2	20127479	57	Y	QEGKHDyDDSSEE	xxxxxDpYxxxxxx
NP_116205.3	50083293	156	Y	GGHSDDyYAVPHR	xxxxxDpYxxxxxx
NP_005900.2	153945728	1938	Y	TPEDGDySYEIIE	xxxxxDpYxxxxxx
NP_114399.1	14165456	1812	Y	TPEDGDySYEIIE	xxxxxDpYxxxxxx
NP_149014.3	42475970	675	Y	FLSGPDyDHVTGS	xxxxxDpYxxxxxx
NP_005535.1	5031805	632	Y	RKGSGDyMPMSPK	xxxxxDpYxxxxxx
NP_055862.1	22095331	960	Y	DVLKDDyDYVLIS	xxxxxDpYxxxxxx
NP_060190.2	62243734	250	Y	FLLDEDyEKVLGY	xxxxxDpYxxxxxx
NP_001013863.1	62243769	250	Y	FLLDEDyEKVLGY	xxxxxDpYxxxxxx
NP_005925.2	21361272	158	Y	SRPSPDyPMLPTI	xxxxxDpYxxxxxx
NP_006173.2	62420884	740	Y	NLYSGDyYRIQGR	xxxxxDpYxxxxxx
NP_001014796.1	62420886	740	Y	NLYSGDyYRIQGR	xxxxxDpYxxxxxx
NP_002259.1	4504901	66	Y	SDIDGDyRVQNTS	xxxxxDpYxxxxxx
NP_001456.3	42476118	571	Y	TAVEIDyDSLKLK	xxxxxDpYxxxxxx
NP_955367.1	40788007	571	Y	TAVEIDyDSLKLK	xxxxxDpYxxxxxx
NP_055202.1	7657293	255	Y	EEGAPDyENLQEL	xxxxxDpYxxxxxx
NP_001014987.1	62739155	226	Y	EEGAPDyENLQEL	xxxxxDpYxxxxxx
NP_001014988.1	62739157	225	Y	EEGAPDyENLQEL	xxxxxDpYxxxxxx
NP_001014989.2	239049118	262	Y	EEGAPDyENLQEL	xxxxxDpYxxxxxx
NP_001062.1	4507751	153	Y	RDMESDySGQGVD	xxxxxDpYxxxxxx
NP_003009.2	149999608	16	Y	MESPPDySAAPRG	xxxxxDpYxxxxxx
NP_005096.1	4826972	54	Y	ARMREDyDSVEQD	xxxxxDpYxxxxxx
NP_775870.1	27734765	335	Y	EKFENDyQEKTPQ	xxxxxDpYxxxxxx
NP_001026918.2	87299626	412	Y	EKFENDyQEKTPQ	xxxxxDpYxxxxxx
NP_006319.1	5454064	645	Y	PDAHSDyARYSGS	xxxxxDpYxxxxxx
NP_006273.1	5454096	433	Y	IPQDGDyEFLKSW	xxxxxDpYxxxxxx
NP_005598.3	27886593	419	Y	VSETDDyAEIIDE	xxxxxDpYxxxxxx
NP_722560.1	24476013	397	Y	VSETDDyAEIIDE	xxxxxDpYxxxxxx
NP_005792.1	5032133	54	Y	QGIADDyDKKKLV	xxxxxDpYxxxxxx
NP_000108.1	4557553	94	Y	KGYNDDyYEESYF	xxxxxDpYxxxxxx
NP_001516.2	222080095	27	Y	SPVPPDyEDEFLR	xxxxxDpYxxxxxx
NP_055022.2	166197668	487	Y	NSSDSDyDLHGAQ	xxxxxDpYxxxxxx
NP_003268.2	195947372	297	Y	PTATGDyDKKNYV	xxxxxDpYxxxxxx
NP_062535.2	146134388	1728	Y	DRGVIDyDRDRFD	xxxxxDpYxxxxxx
NP_009017.1	5901892	323	Y	SRVEKDyNDLFDG	xxxxxDpYxxxxxx
NP_001008397.1	56550086	200	Y	SRVEKDyNDLFDG	xxxxxDpYxxxxxx
NP_002600.1	4505683	751	Y	KDESVDyVPMLDM	xxxxxDpYxxxxxx
NP_004631.1	4758112	13	Y	DNELLDyEDDEVE	xxxxxDpYxxxxxx
NP_542165.1	18375623	13	Y	DNELLDyEDDEVE	xxxxxDpYxxxxxx
NP_995310.2	262118326	57	Y	EDPRADyACIAEN	xxxxxDpYxxxxxx
NP_620305.1	21040326	1790	Y	SEEKDDyEIFVKV	xxxxxDpYxxxxxx
NP_620303.1	21040320	1471	Y	SEEKDDyEIFVKV	xxxxxDpYxxxxxx
NP_115571.1	21040314	1790	Y	SEEKDDyEIFVKV	xxxxxDpYxxxxxx
NP_620304.1	21040322	1790	Y	SEEKDDyEIFVKV	xxxxxDpYxxxxxx
NP_478063.2	21040318	1790	Y	SEEKDDyEIFVKV	xxxxxDpYxxxxxx
NP_003094.4	38146099	1750	Y	SEEKDDyEIFVKV	xxxxxDpYxxxxxx
AAH38596.1	24047226	107	Y	DSEGSDyTPGKKK	xxxxxDpYxxxxxx
NP_001264.2	51599156	110	Y	DSEGSDyTPGKKK	xxxxxDpYxxxxxx
NP_000958.1	4506649	307	Y	NNASTDyDLSDKS	xxxxxDpYxxxxxx
NP_001029025.1	76496472	258	Y	NNASTDyDLSDKS	xxxxxDpYxxxxxx
NP_002221.1	4504811	660	Y	EDKNPDyRKRVSV	xxxxxDpYxxxxxx
NP_068831.1	12056468	660	Y	EDKNPDyRKRVSV	xxxxxDpYxxxxxx
NP_054700.2	83977452	802	Y	NLYAGDyYRVQGR	xxxxxDpYxxxxxx
NP_054699.2	83977450	796	Y	NLYAGDyYRVQGR	xxxxxDpYxxxxxx
NP_001945.3	38327632	759	Y	NLYAGDyYRVQGR	xxxxxDpYxxxxxx
NP_002383.2	89993689	400	Y	SQESEDySQPSTS	xxxxxDpYxxxxxx
NP_001348.2	100913206	1234	Y	GNSGGDyRGPSGG	xxxxxDpYxxxxxx
NP_085077.1	13514822	199	Y	GNSGGDyRGPSGG	xxxxxDpYxxxxxx
NP_001007158.1	55769550	23	Y	LLEALDyDSSDDS	xxxxxDpYxxxxxx
NP_055475.2	55769548	23	Y	LLEALDyDSSDDS	xxxxxDpYxxxxxx
NP_003970.1	4506403	350	Y	PSPYKDyEVKKEG	xxxxxDpYxxxxxx
NP_003394.1	4507955	251	Y	ENSPPDySEYMTG	xxxxxDpYxxxxxx
NP_005222.2	20357552	178	Y	SAVGFDyQGKTEK	xxxxxDpYxxxxxx
NP_612632.1	20357556	178	Y	SAVGFDyQGKTEK	xxxxxDpYxxxxxx
NP_004937.1	31377468	209	Y	SKDQPDyAMYSRI	xxxxxDpYxxxxxx
NP_112226.2	23308574	75	Y	SHVENDyIDNPSL	xxxxxDpYxxxxxx
NP_006268.2	194294521	859	Y	PASVTDyQNVSFS	xxxxxDpYxxxxxx
NP_062541.3	194294523	832	Y	PASVTDyQNVSFS	xxxxxDpYxxxxxx
NP_671494.2	194294525	859	Y	PASVTDyQNVSFS	xxxxxDpYxxxxxx
NP_001284.1	4502891	214	Y	EDSIRDyEDGMEV	xxxxxDpYxxxxxx
NP_057280.2	226497574	169	Y	SKPASDyLNFDSD	xxxxxDpYxxxxxx
NP_000112.1	4503591	468	Y	SGISTDySSGDSQ	xxxxxDpYxxxxxx
NP_859071.2	71040096	816	Y	CTEGGDyCLIPRT	xxxxxDpYxxxxxx
NP_001020769.1	71040098	1027	Y	CTEGGDyCLIPRT	xxxxxDpYxxxxxx
NP_001210.1	4502551	47	Y	DAQSFDyDHDAFL	xxxxxDpYxxxxxx
NP_002936.1	4506583	599	Y	DVKPVDyREYGRR	xxxxxDpYxxxxxx
NP_059345.1	9257199	471	Y	AIPPPDyGAASRA	xxxxxDpYxxxxxx
NP_059344.1	9257197	471	Y	AIPPPDyGAASRA	xxxxxDpYxxxxxx
NP_006331.1	5453565	471	Y	AIPPPDyGAASRA	xxxxxDpYxxxxxx
NP_060894.2	110624794	493	Y	DDSHFDyVHDQNQ	xxxxxDpYxxxxxx
NP_006173.2	62420884	481	Y	FPLRPDyQEPSRL	xxxxxDpYxxxxxx
NP_001014796.1	62420886	481	Y	FPLRPDyQEPSRL	xxxxxDpYxxxxxx
NP_003740.2	38683860	978	Y	RSPLSDyMNLDFS	xxxxxDpYxxxxxx
NP_002825.3	33356177	62	Y	IQNTGDyYDLYGG	xxxxxDpYxxxxxx
NP_055847.1	7657269	1187	Y	HSENEDyTMSSPL	xxxxxDpYxxxxxx
NP_057012.1	7705288	1187	Y	HSENEDyTMSSPL	xxxxxDpYxxxxxx
NP_000133.1	4503711	647	Y	DVHNLDyYKKTTN	xxxxxDpYxxxxxx
NP_075254.1	13112048	535	Y	DVHNLDyYKKTTN	xxxxxDpYxxxxxx
NP_003984.2	47717134	95	Y	AYYDTDyRHSYEY	xxxxxDpYxxxxxx
NP_001282.1	4557477	95	Y	AYYDTDyRHSYEY	xxxxxDpYxxxxxx
NP_078946.1	13375930	310	Y	YLFDLDyESDEFT	xxxxxDpYxxxxxx
NP_036457.1	6912494	124	Y	NYDGKDyDPVAAR	xxxxxDpYxxxxxx
NP_002651.2	33598948	771	Y	GTAEPDyGALYEG	xxxxxDpYxxxxxx
NP_877963.1	33598946	771	Y	GTAEPDyGALYEG	xxxxxDpYxxxxxx
NP_005222.2	20357552	453	Y	SMEAADyREASSQ	xxxxxDpYxxxxxx
NP_612632.1	20357556	416	Y	SMEAADyREASSQ	xxxxxDpYxxxxxx
NP_036466.2	154354979	1428	Y	THNSLDyYKSSEK	xxxxxDpYxxxxxx
NP_006130.1	5453611	191	Y	RLLHSDyMNMTPR	xxxxxDpYxxxxxx
NP_004078.2	148539578	782	Y	EVDGRDyHFVTSR	xxxxxDpYxxxxxx
NP_001091894.1	148539628	760	Y	EVDGRDyHFVTSR	xxxxxDpYxxxxxx
NP_004963.1	4826776	813	Y	SLFTPDyELLTEN	xxxxxDpYxxxxxx
NP_003607.1	4506961	171	Y	ESPGIDyVQIGFP	xxxxxDpYxxxxxx
NP_001009183.1	57165352	171	Y	ESPGIDyVQIGFP	xxxxxDpYxxxxxx
NP_060018.1	8923710	95	Y	EQKEVDySGLRVQ	xxxxxDpYxxxxxx
NP_062543.1	9624998	246	Y	YGGYDDyGGYNDG	xxxxxDpYxxxxxx
NP_001027565.1	74099697	246	Y	YGGYDDyGGYNDG	xxxxxDpYxxxxxx
NP_002818.1	4506289	66	Y	HQEDNDyINASLI	xxxxxDpYxxxxxx
NP_009114.1	6005830	176	Y	VGSRADyDTLSLR	xxxxxDpYxxxxxx
NP_005219.2	29725609	1172	Y	SLDNPDyQQDFFP	xxxxxDpYxxxxxx
AAK69431.1	14582259	1104	Y	QIPEGDyLSYREF	xxxxxDpYxxxxxx
NP_061165.1	8923909	1104	Y	QIPEGDyLSYREF	xxxxxDpYxxxxxx
NP_001006600.1	55770895	1104	Y	QIPEGDyLSYREF	xxxxxDpYxxxxxx
NP_068774.1	11386179	43	Y	CEEVRDyVEERSG	xxxxxDpYxxxxxx
NP_005817.1	5031755	434	Y	STAYEDyYYHPPP	xxxxxDpYxxxxxx
NP_006074.2	125988409	325	Y	FEDIGDyVPSTTK	xxxxxDpYxxxxxx
NP_005966.1	5174647	114	Y	EKPSADyVLSVRD	xxxxxDpYxxxxxx
NP_005535.1	5031805	732	Y	LPCTGDyMNMSPV	xxxxxDpYxxxxxx
NP_001059.2	19913408	1553	Y	SENEGDyNPGRKT	xxxxxDpYxxxxxx
NP_003984.2	47717134	82	Y	SYRRNDySRDRGD	xxxxxDpYxxxxxx
NP_001282.1	4557477	82	Y	SYRRNDySRDRGD	xxxxxDpYxxxxxx
NP_055662.3	188497758	834	Y	TRFPLDyYSIPFP	xxxxxDpYxxxxxx
NP_000164.4	150417978	294	Y	DTDLYDyYPEEDT	xxxxxDpYxxxxxx
NP_005467.1	4885285	197	Y	SAKNKDyMSIIRM	xxxxxDpYxxxxxx
NP_000595.1	11276087	653	Y	DIHHIDyYKKTTN	xxxxxDpYxxxxxx
NP_056934.2	13186251	651	Y	DIHHIDyYKKTTN	xxxxxDpYxxxxxx
NP_075593.1	13186234	564	Y	DIHHIDyYKKTTN	xxxxxDpYxxxxxx
NP_075594.1	13186236	562	Y	DIHHIDyYKKTTN	xxxxxDpYxxxxxx
NP_075598.2	105990522	653	Y	DIHHIDyYKKTTN	xxxxxDpYxxxxxx
NP_075599.1	13186249	653	Y	DIHHIDyYKKTTN	xxxxxDpYxxxxxx
NP_005461.2	61743942	213	Y	PTVPNDyMTSPAR	xxxxxDpYxxxxxx
NP_001012768.1	61743944	213	Y	PTVPNDyMTSPAR	xxxxxDpYxxxxxx
NP_001012769.1	61743946	213	Y	PTVPNDyMTSPAR	xxxxxDpYxxxxxx
NP_001012770.1	61743948	208	Y	PTVPNDyMTSPAR	xxxxxDpYxxxxxx
NP_997195.1	46409270	161	Y	ERLSVDySKKSKL	xxxxxDpYxxxxxx
NP_003600.2	21396500	111	Y	EASSPDyFGPPAK	xxxxxDpYxxxxxx
NP_002131.2	14165439	236	Y	YDETYDyGGFTMM	xxxxxDpYxxxxxx
NP_112552.1	14165435	236	Y	YDETYDyGGFTMM	xxxxxDpYxxxxxx
NP_112553.1	14165437	236	Y	YDETYDyGGFTMM	xxxxxDpYxxxxxx
NP_005511.1	5031753	246	Y	YGGYDDyNGYNDG	xxxxxDpYxxxxxx
NP_062565.2	21361831	1080	Y	QARERDyAEIQDF	xxxxxDpYxxxxxx
NP_003740.2	38683860	632	Y	HPYPEDyGDIEIG	xxxxxDpYxxxxxx
NP_004857.4	116256358	36	Y	VPPGLDyYNPFSD	xxxxxDpYxxxxxx
NP_438173.1	16445414	36	Y	VPPGLDyYNPFSD	xxxxxDpYxxxxxx
NP_005991.1	17921989	161	Y	ERLSVDyGKKSKL	xxxxxDpYxxxxxx
NP_003709.3	145309302	1277	Y	TEEDLDyRTENQH	xxxxxDpYxxxxxx
NP_112557.2	145309300	1217	Y	TEEDLDyRTENQH	xxxxxDpYxxxxxx
NP_005229.1	4885219	223	Y	DTLQNDyFAIKQE	xxxxxDpYxxxxxx
NP_848537.1	41281905	11	Y	KTASGDyIDSSWE	xxxxxDpYxxxxxx
NP_113659.3	28626504	11	Y	KTASGDyIDSSWE	xxxxxDpYxxxxxx
NP_055554.1	7661958	383	Y	DQEALDyFSDKES	xxxxxDpYxxxxxx
NP_001070908.1	117938251	381	Y	DQEALDyFSDKES	xxxxxDpYxxxxxx
NP_006258.3	150418007	2666	Y	YKNRPDyVSEEEE	xxxxxDpYxxxxxx
NP_003879.2	25777724	168	Y	IPVDGDyFTFTRH	xxxxxDpYxxxxxx
NP_733797.1	25777726	168	Y	IPVDGDyFTFTRH	xxxxxDpYxxxxxx
NP_733798.1	25777728	72	Y	IPVDGDyFTFTRH	xxxxxDpYxxxxxx
NP_005772.3	56549666	283	Y	LPQNDDyYVMQEH	xxxxxDpYxxxxxx
NP_001010938.1	58331191	346	Y	LPQNDDyYVMQEH	xxxxxDpYxxxxxx
NP_612403.2	20149709	34	Y	EEGEIDySAEEGE	xxxxxDpYxxxxxx
NP_001372.1	4503357	409	Y	NPATDDyAVPPPR	xxxxxDpYxxxxxx
NP_002148.1	4504523	88	Y	VLDDKDyFLFRDG	xxxxxDpYxxxxxx
NP_005480.2	216547763	26	Y	PEAGSDyVKFSKE	xxxxxDpYxxxxxx
NP_057507.2	156415996	533	Y	KCPHCDyAGTQSG	xxxxxDpYxxxxxx
NP_003321.3	148277065	65	Y	LPKSYDyDLIIIG	xxxxxDpYxxxxxx
NP_877393.1	33519426	13	Y	LPKSYDyDLIIIG	xxxxxDpYxxxxxx
NP_877419.1	33519428	13	Y	LPKSYDyDLIIIG	xxxxxDpYxxxxxx
NP_877420.1	33519430	13	Y	LPKSYDyDLIIIG	xxxxxDpYxxxxxx
NP_001087240.1	148277071	163	Y	LPKSYDyDLIIIG	xxxxxDpYxxxxxx
NP_001433.1	4557579	20	Y	SENFDDyMKEVGV	xxxxxDpYxxxxxx
NP_079031.2	63176611	297	Y	EKESKDyEMNANH	xxxxxDpYxxxxxx
NP_001013865.1	62244004	279	Y	EKESKDyEMNANH	xxxxxDpYxxxxxx
NP_002010.2	156104876	1242	Y	TSMFDDyQGDSST	xxxxxDpYxxxxxx
NP_002010.2	156104876	1327	Y	CSPPPDyNSVVLY	xxxxxDpYxxxxxx
NP_071908.2	33149331	385	Y	TDSLRDyTNLPEA	xxxxxDpYxxxxxx
NP_919279.1	34916036	222	Y	LDEELDyRKQALD	xxxxxDpYxxxxxx
NP_116210.2	119703749	1072	Y	SILKPDyQPLAIK	xxxxxDpYxxxxxx
NP_004406.2	58530840	55	Y	TDQNSDyYCQTGT	xxxxxDpYxxxxxx
NP_001008844.1	58530842	55	Y	TDQNSDyYCQTGT	xxxxxDpYxxxxxx
NP_002010.2	156104876	1053	Y	IYKNPDyVRKGDT	xxxxxDpYxxxxxx
NP_000236.2	42741655	1003	Y	SNESVDyRATFPE	xxxxxDpYxxxxxx
NP_072174.3	66529407	327	Y	PSVSVDyNTSDPL	xxxxxDpYxxxxxx
NP_079094.1	13376212	68	Y	MGIVSDyEKIRTF	xxxxxDpYxxxxxx
NP_938143.1	38327032	12	Y	MGIVSDyEKIRTF	xxxxxDpYxxxxxx
NP_072174.3	66529407	1149	Y	SYSSPDySLQHFS	xxxxxDpYxxxxxx
NP_004439.2	54792096	1126	Y	LPSETDyYVAPLT	xxxxxDpYxxxxxx
NP_001005862.1	54792098	1096	Y	LPSETDyYVAPLT	xxxxxDpYxxxxxx
NP_002222.1	4504813	261	Y	HVHSEDySKVPKY	xxxxxDpYxxxxxx
NP_001020015.1	67782354	236	Y	HVHSEDySKVPKY	xxxxxDpYxxxxxx
NP_004206.1	4758230	94	Y	EQLEPDyFKDMTP	xxxxxDpYxxxxxx
NP_936056.1	37694065	94	Y	EQLEPDyFKDMTP	xxxxxDpYxxxxxx
NP_066943.2	119943106	673	Y	EVDGQDyHFVVSR	xxxxxDpYxxxxxx
NP_065781.1	119943108	368	Y	EVDGQDyHFVVSR	xxxxxDpYxxxxxx
NP_004121.2	20127457	332	Y	EQGQADyMGADSF	xxxxxDpYxxxxxx
NP_001334.2	148491082	342	Y	LNGDVDyFGQQFD	xxxxxDpYxxxxxx
NP_003812.1	4506537	474	Y	LIMKEDyELVSTK	xxxxxDpYxxxxxx
NP_055530.2	29469071	1680	Y	YDNLEDyHSLPQH	xxxxxDpYxxxxxx
[truncated: 1,688 more rows]

## Sheet: Sheet 2
The occurrence of each of the 13 pTyr site motifs and the number of proteins containing these motifs
Motif	Unique number for the occurrence of the motif	Unique number of proteins
RxxSxxpYxxxxxx	52	84
xxSxxxpYxxxxxx	305	413
xxxDxxpYxxxxxx	338	434
xxxEDxpYxxxxxx	70	113
xxxExxpYxxxxxx	342	447
xxxxxDpYxxxxxx	416	568
xxxxxxpYDxPxxx	41	36
xxxxxxpYExPxxx	48	62
xxxxxxpYSPxxxx	69	92
xxxxxxpYxDxxxx	262	372
xxxxxxpYxSPxxx	58	91
xxxxxxpYxxxDxx	209	304
xxxxxxpYxxxxKx	217	293
